# Supplementary material for: GO/APTES-mediated bifunctional CuFe2O4@GO-NH2-facilitated synthesis of pyrazolo-triazepine scaffolds as a potent post-prandial antidiabetic agent against dual α-amylase and α-glucosidase enzymes
Source: Royal Society of Chemistry journal article supplement (doi:10.1039/d6ra00293e), 2026-05-18
Supplement: d6ra00293e1.pdf [file d6ra00293e1.pdf]

## Supporting information

**GO/APTES mediated bifunctional CuFe<sub>2</sub>O<sub>4</sub>@GO-NH<sub>2</sub> facilitated synthesis of pyrazolo-triazepine scaffolds as potent post prandial antidiabetic agent against dual  $\alpha$ -amylase and  $\alpha$ -glucosidase enzymes**

Romica Jain, Ashok Kumar, Pratibha Sharma\*

*School of Chemical Science, Devi Ahilya University, Indore 452001 (M.P.), India*

*Corresponding author email- [drpratibhasharma@yahoo.com](mailto:drpratibhasharma@yahoo.com)*

## Table Contents

- Figure S1-S28. The spectra of pyrazole fused [1,2,4]triazepine scaffolds (4a-n)
- Figure S29-S42. The spectra of dibenzalacetone (1a-g)
- Figure S43-44. The spectra of [4,5]dihydropyrazole (IIIab)
- Figure S45-46. The spectra of hydrazone i.e. 4,4'-(3-(2-(2,4-dinitrophenyl)hydrazono)penta-1,4-diene-1,5-diyl)diphenol (IIab)
- Figure S47. 2D (left) and 3D (right) representations of closest binding interaction between synthesized ligands (4a-4n) and receptor protein 2QV4
- Figure S48. 2D (left) and 3D (right) representations of closest binding interaction between synthesized ligands (4a-4n) and receptor protein 3W37
- Figure S49. Molecular orbitals diagram (HOMO; bottom and LUMO; top) with HOMO-LUMO energy gap.
- Table S1. Absorbance and corresponding % Inhibition of the tested compounds (4a-4n) against  $\alpha$ -amylase at different concentrations.
- Table S2. Absorbance and corresponding % Inhibition of the tested compounds (4a-4n) against  $\alpha$ -amylase at different concentrations.

**Figure S1.**  $^1\text{H}$  NMR of 1-(2,4-dinitrophenyl)-2,5-diphenyl-8-(pyridin-4-yl)-2,3,5,6,7,8-hexahydro-1H-pyrazolo[1,5-d][1,2,4]triazepin-8-ol (4a)

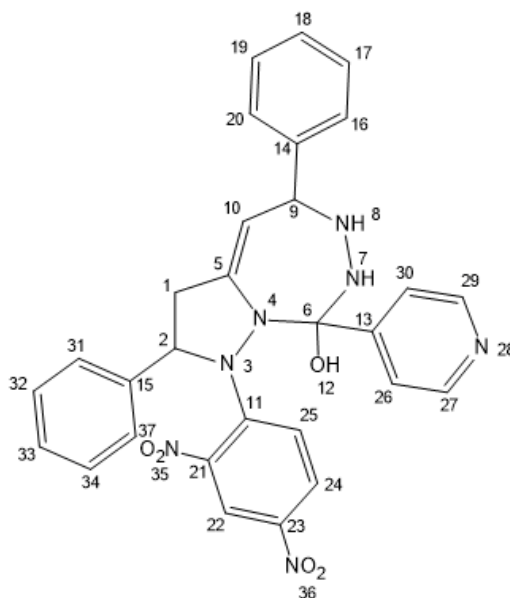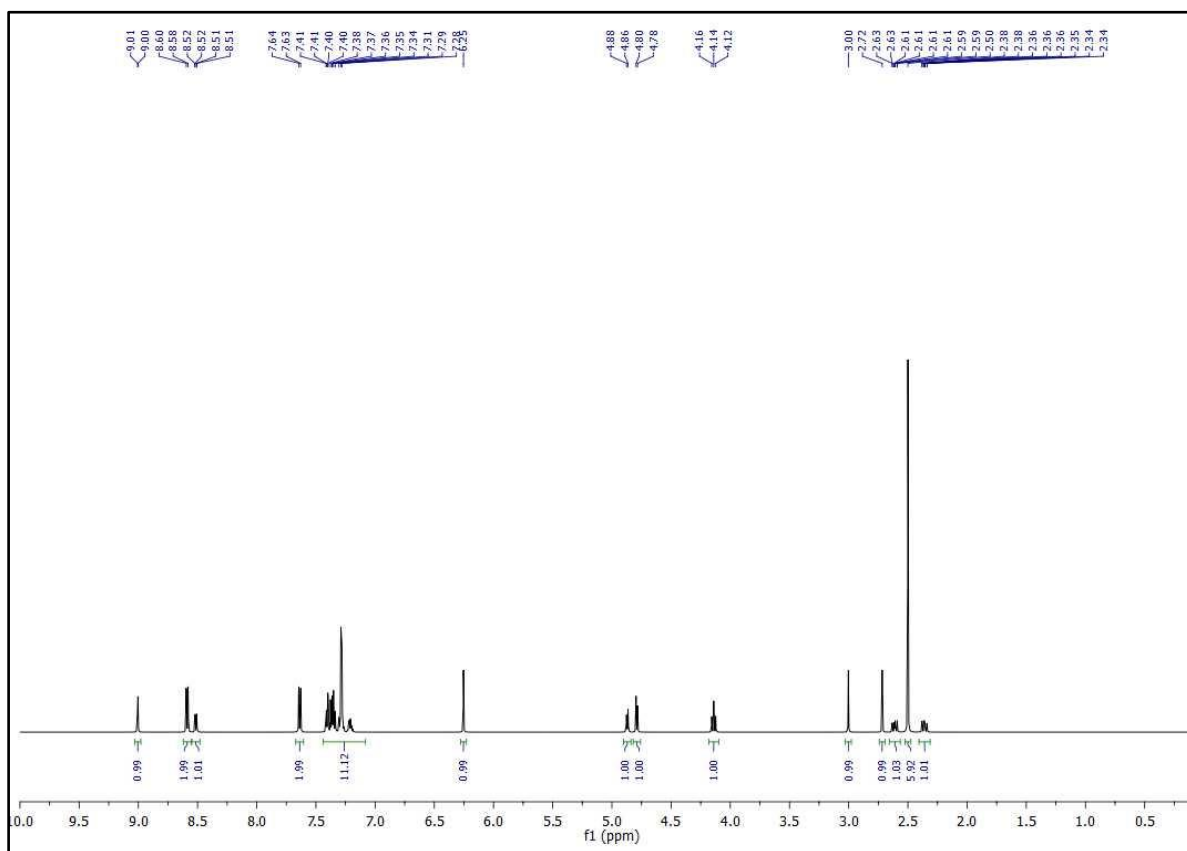

**Figure S2.**  $^{13}\text{C}$  NMR of 1-(2,4-dinitrophenyl)-2,5-diphenyl-8-(pyridin-4-yl)-2,3,5,6,7,8-hexahydro-1H-pyrazolo[1,5-d][1,2,4]triazepin-8-ol (4a)

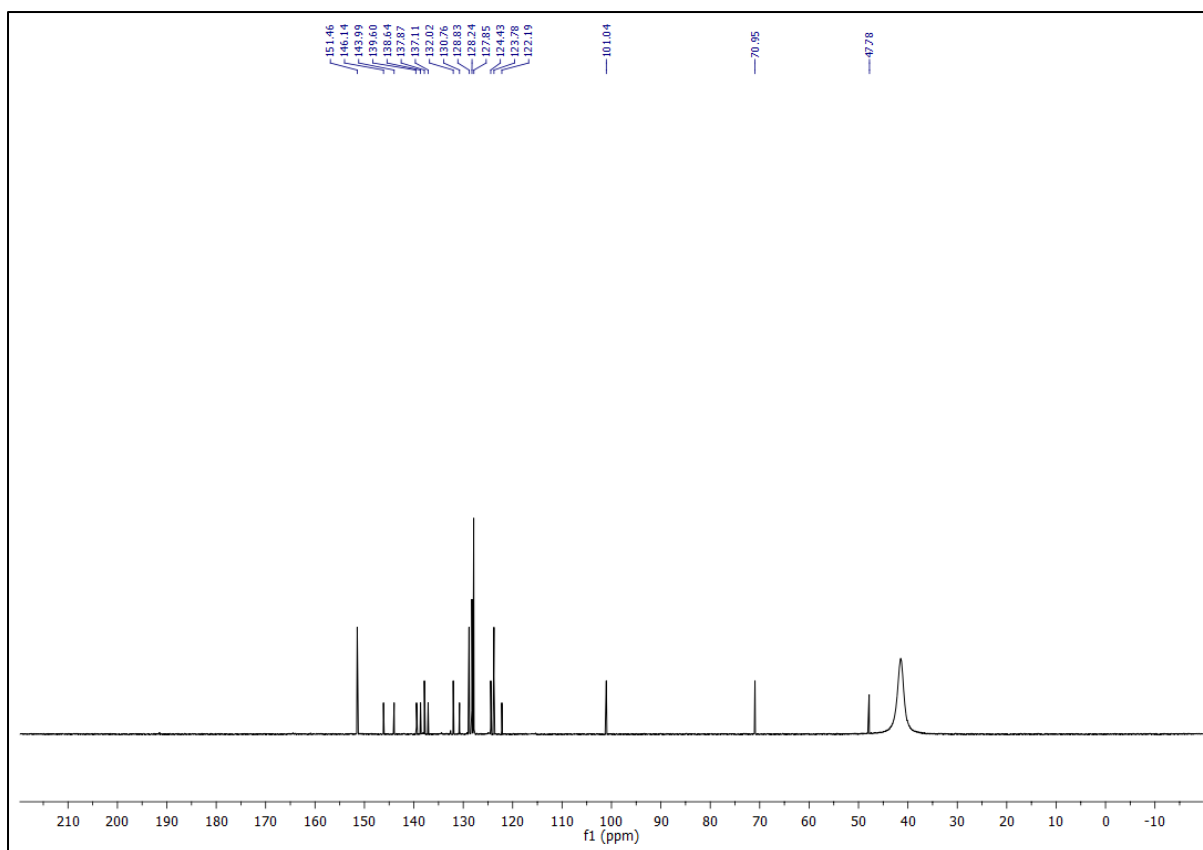

**Figure S3.**  $^1\text{H}$  NMR of 4,4'-(1-(2,4-dinitrophenyl)-8-hydroxy-8-(pyridin-4-yl)-2,3,5,6,7,8-hexahydro-1H-pyrazolo[1, 5-d][1,2,4]triazepine-2,5-diyl)diphenol (4b)

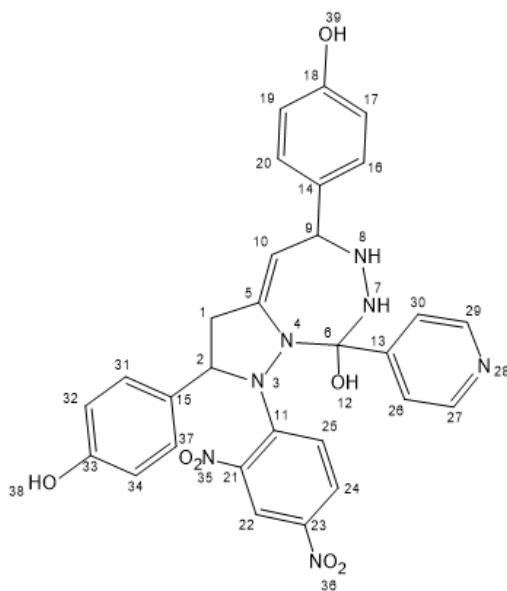

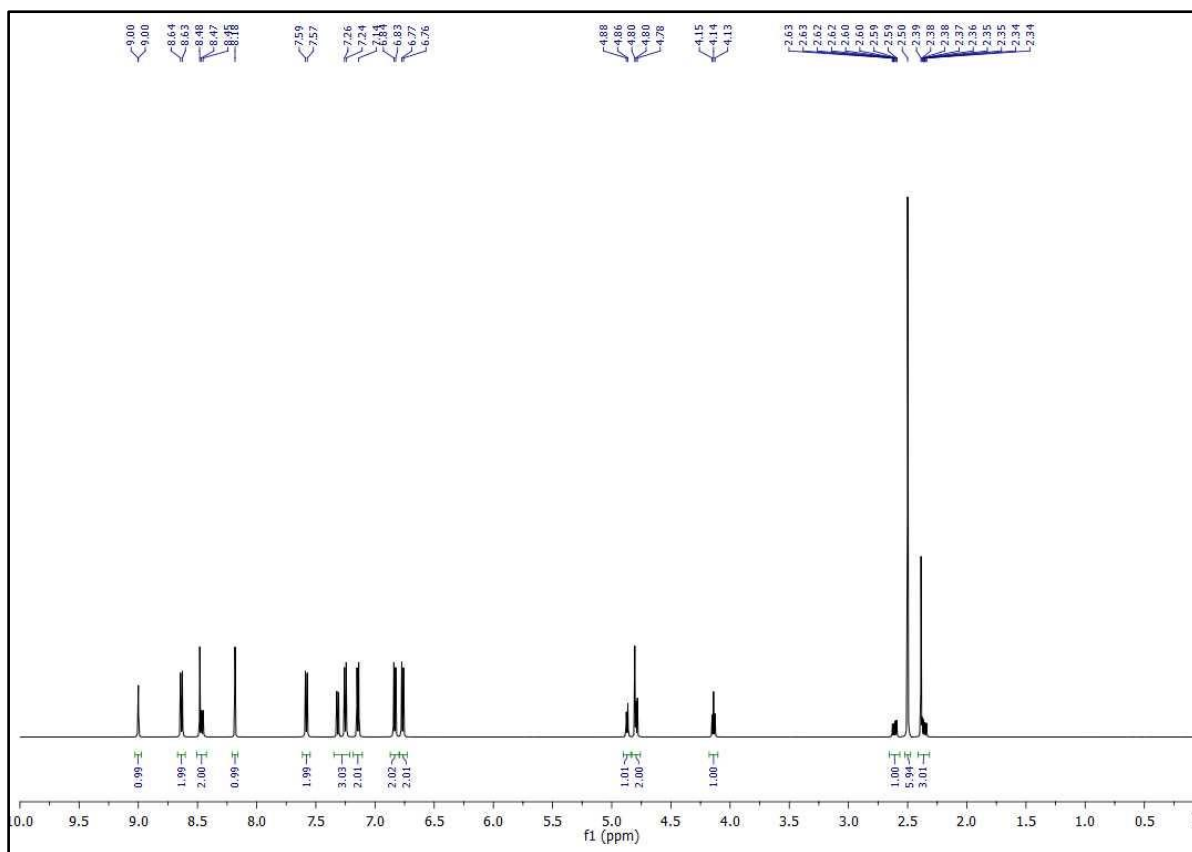

**Figure S4.**  $^{13}\text{C}$  NMR of 4,4'-(1-(2,4-dinitrophenyl)-8-hydroxy-8-(pyridin-4-yl)-2,3,5,6,7,8-hexahydro-1H-pyrazolo[1, 5-d][1,2,4]triazepine-2,5-diyl)diphenol (4b)

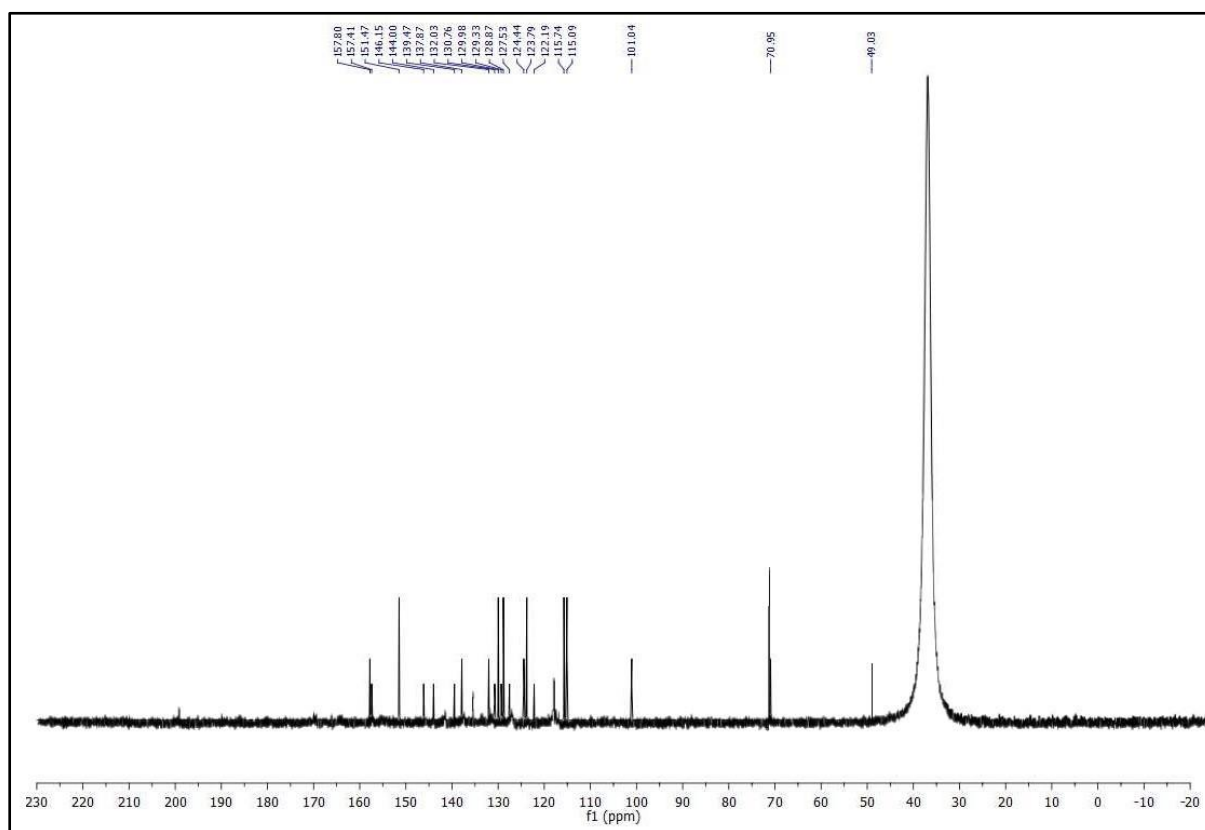

**Figure S5.**  $^1\text{H}$  NMR of 1-(2,4-dinitrophenyl)-2,5-bis(4-nitrophenyl)-8-(pyridin-4-yl)-2,3,5,6,7,8-hexahydro-1H-pyrazolo[1,5-d][1,2,4]triazepin-8-ol (4c)

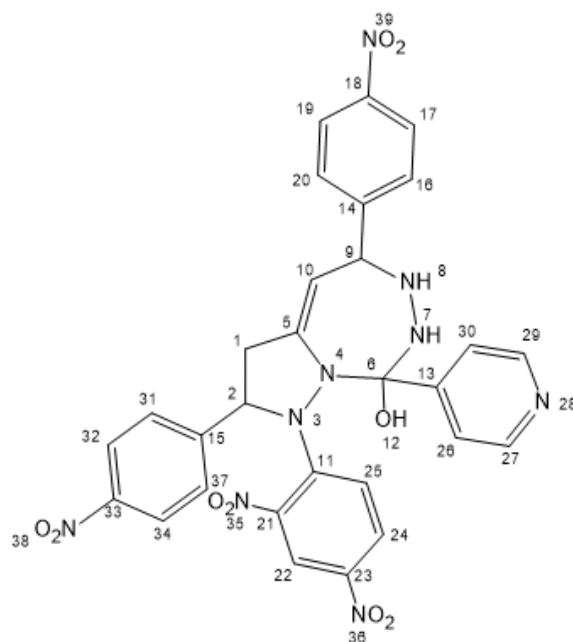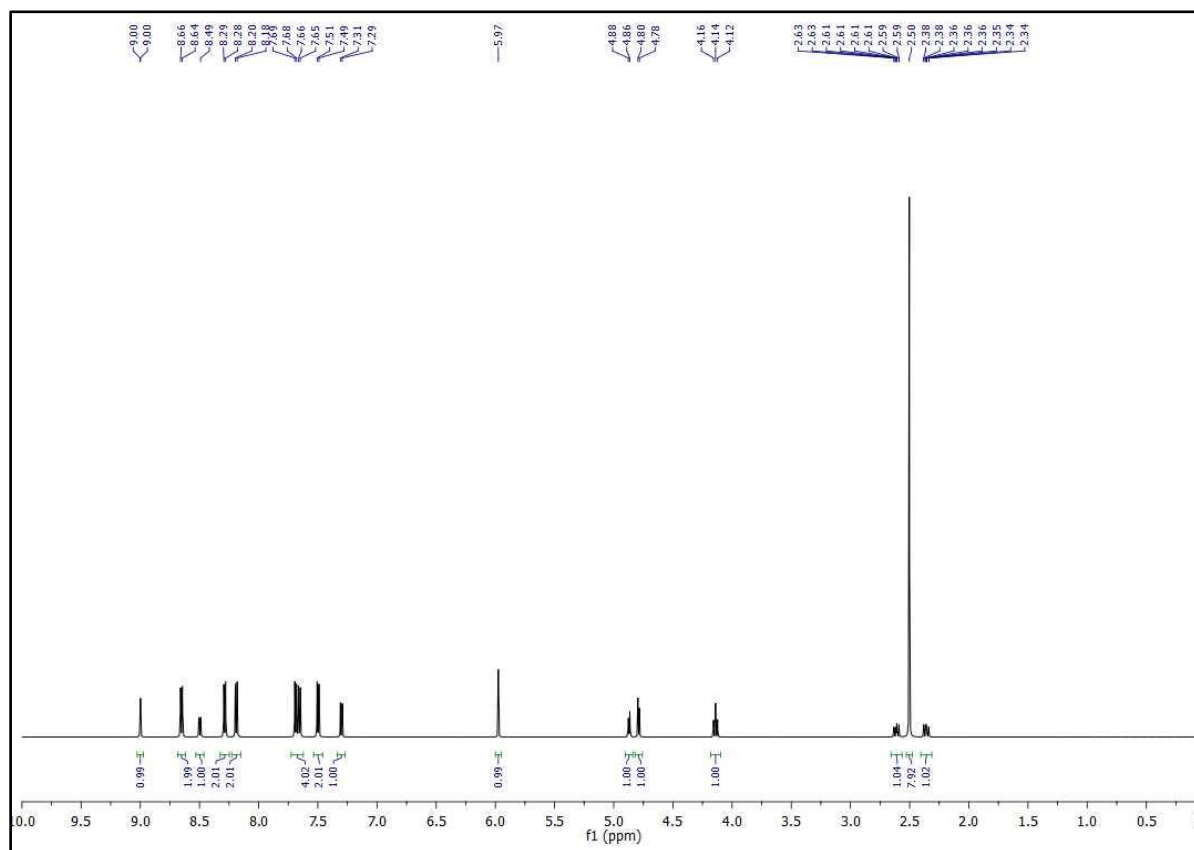

**Figure S6.**  $^{13}\text{C}$  NMR of 1-(2,4-dinitrophenyl)-2,5-bis(4-nitrophenyl)-8-(pyridin-4-yl)-2,3,5,6,7,8-hexahydro-1H-pyrazolo[1,5-d][1,2,4]triazepin-8-ol (4c)

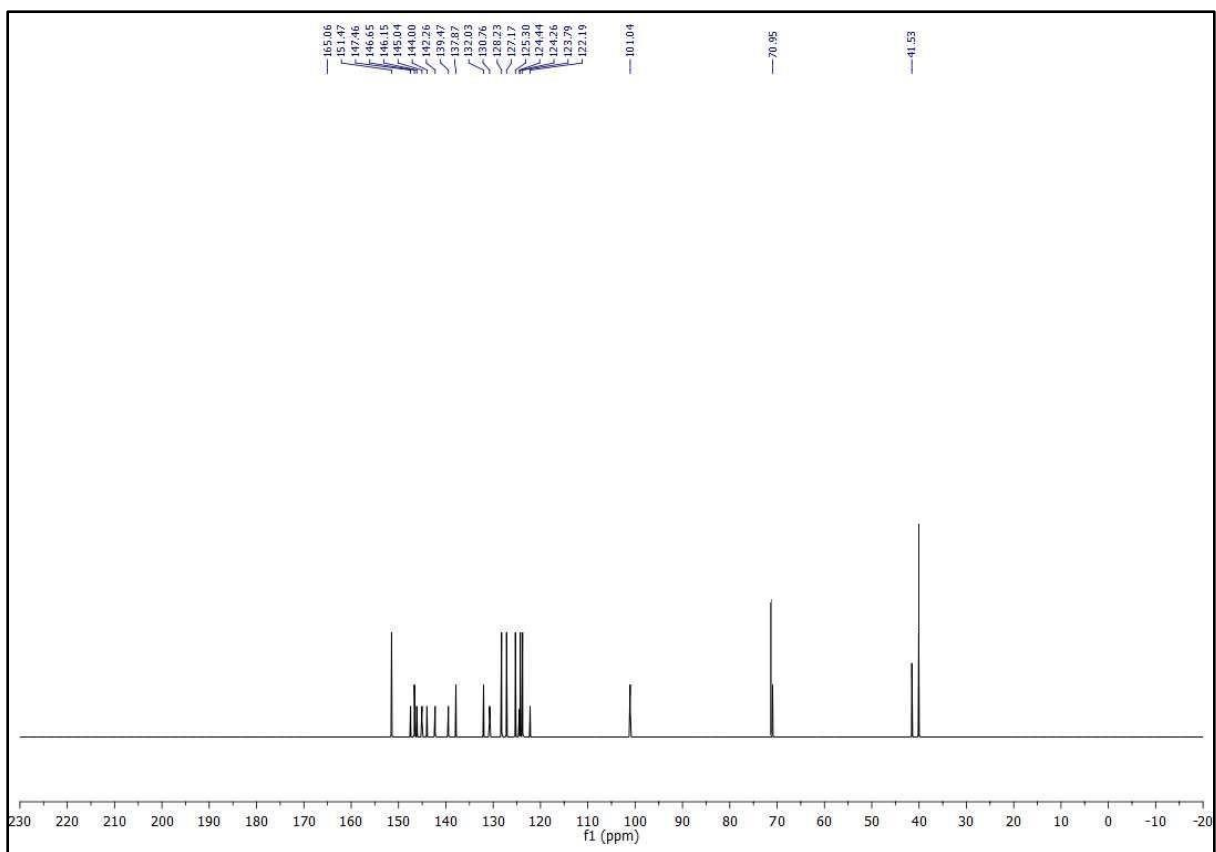

**Figure S7.**  $^1\text{H}$  NMR of 4,4'-(1-(2,4-dinitrophenyl)-8-hydroxy-8-(pyridin-4-yl)-2,3,5,6,7,8-hexahydro-1H-pyrazolo[1, 5-d][1,2,4]triazepine-2,5-diyl)bis(2-methoxyphenol) (4d)

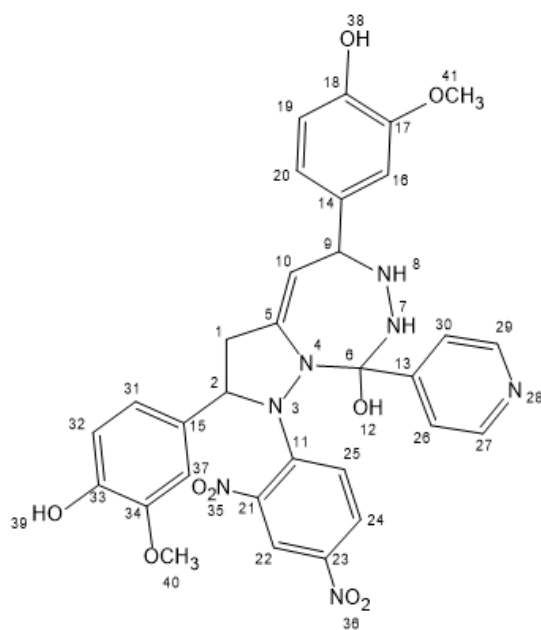

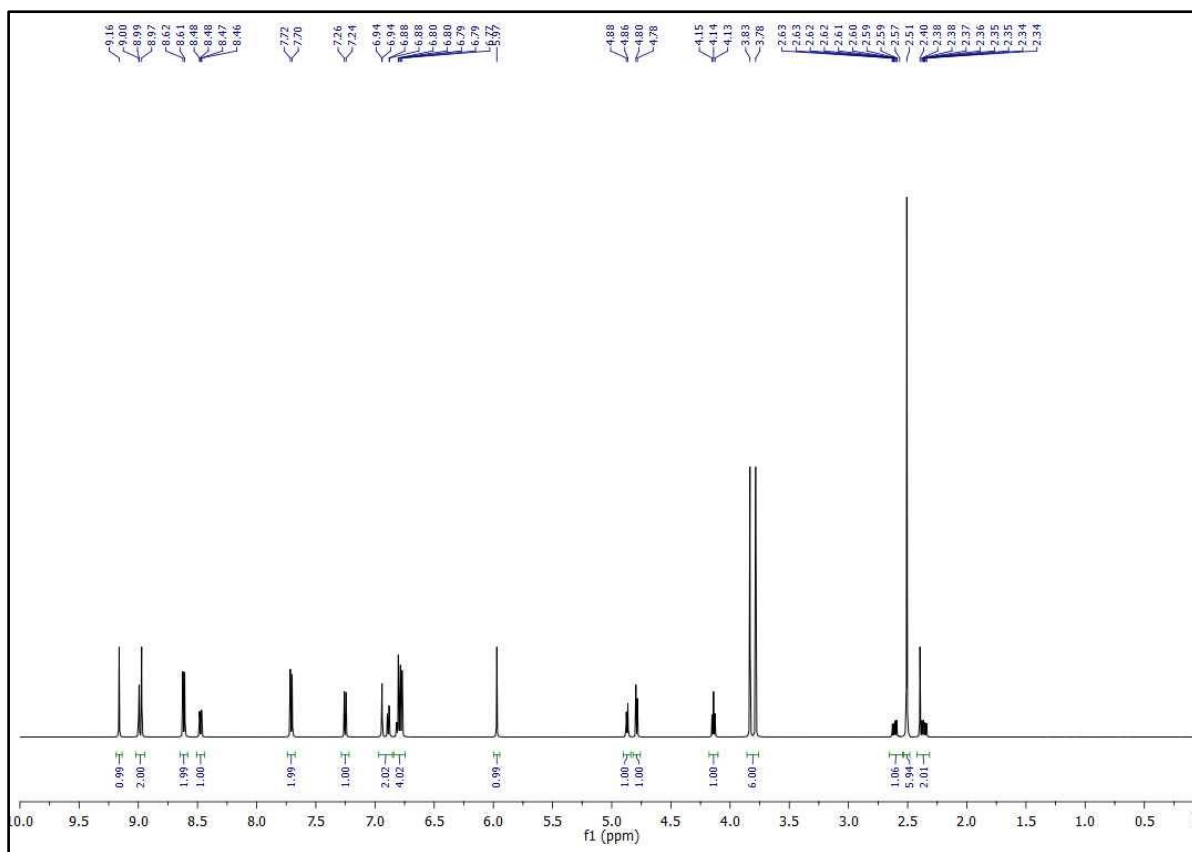

**Figure S8.**  $^{13}\text{C}$  NMR of 4,4'-(1-(2,4-dinitrophenyl)-8-hydroxy-8-(pyridin-4-yl)-2,3,5,6,7,8-hexahydro-1H-pyrazolo[1, 5-d][1,2,4]triazepine-2,5-diyl)bis(2-methoxyphenol) (4d)

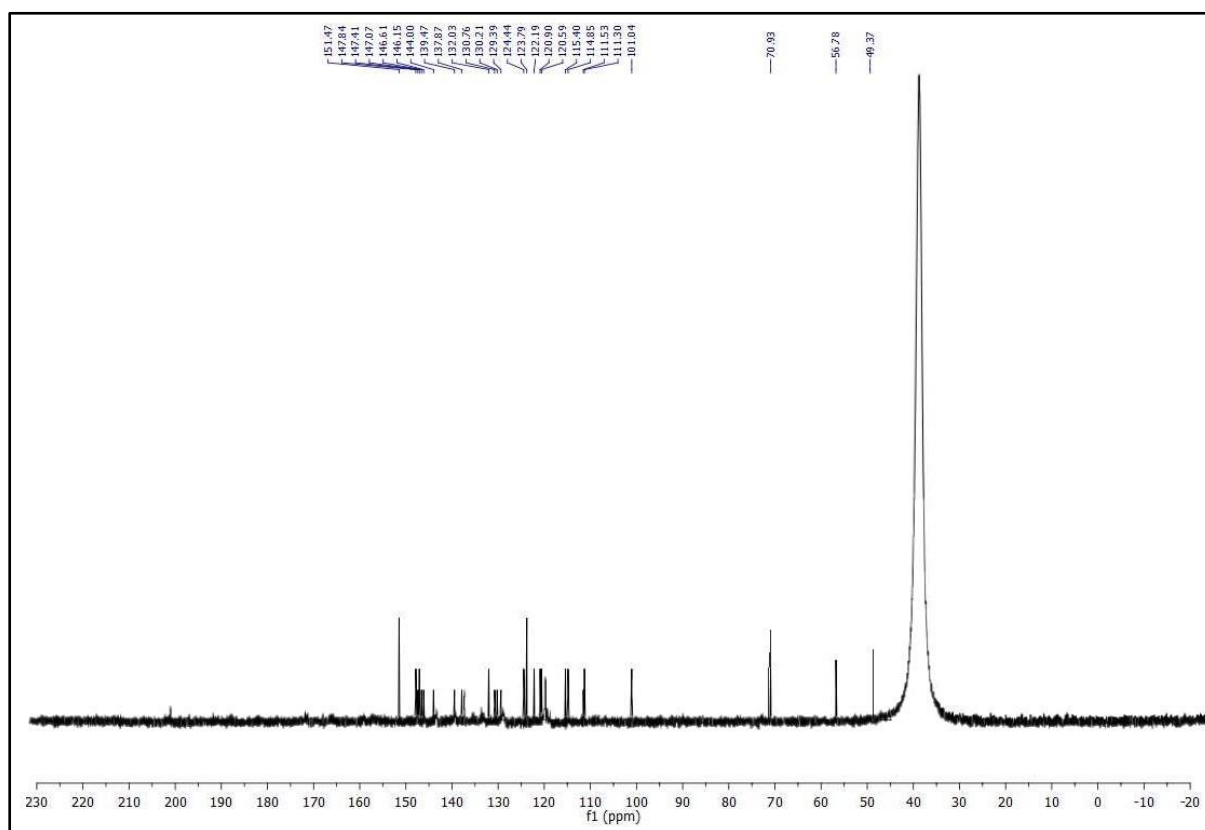

**Figure S9.**  $^1\text{H}$  NMR of 2,2'-(1-(2,4-dinitrophenyl)-8-hydroxy-8-(pyridin-4-yl)-2,3,5,6,7,8-hexahydro-1H-pyrazolo[1,5-d][1,2,4]triazepine-2,5-diyl)diphenol (4e)

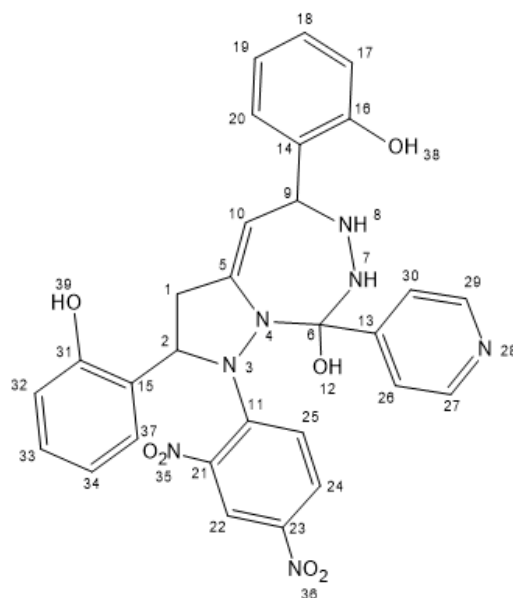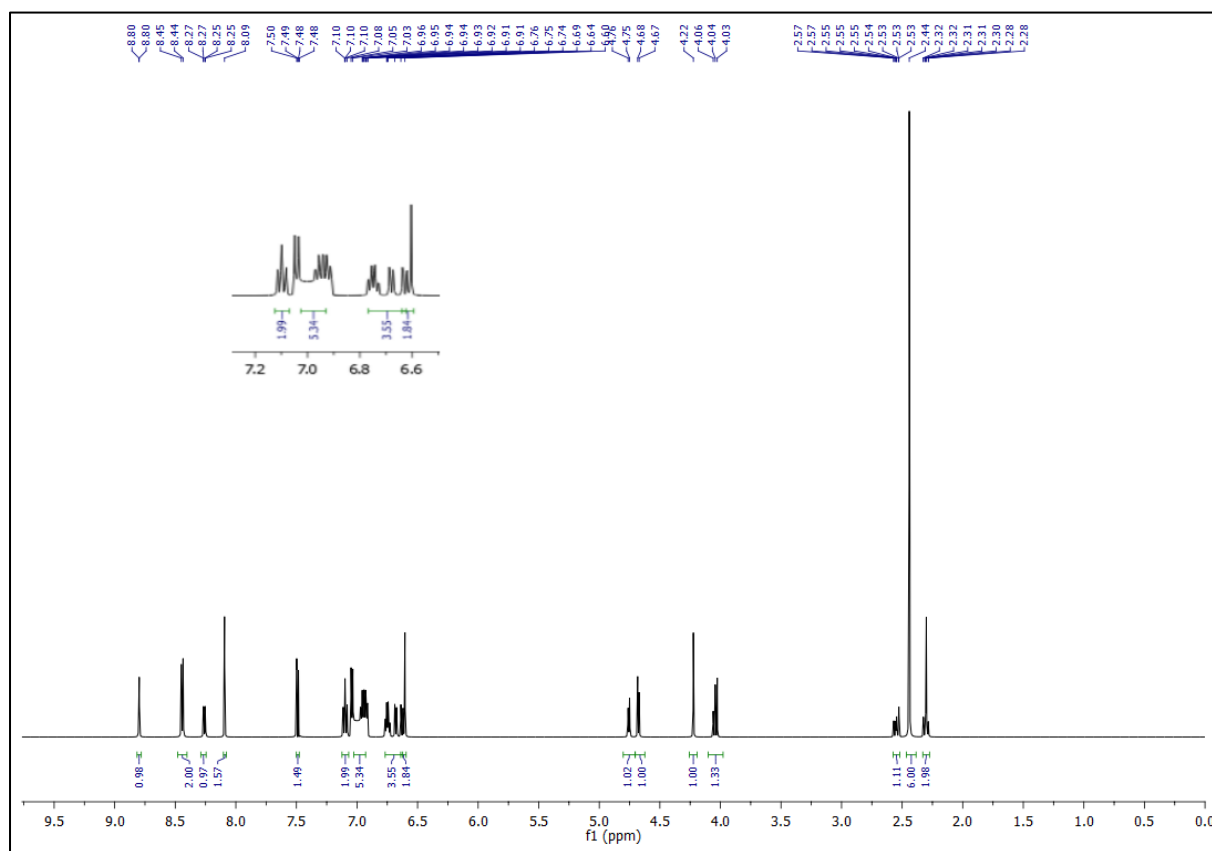

**Figure S10.**  $^{13}\text{C}$  NMR of 2,2'-(1-(2,4-dinitrophenyl)-8-hydroxy-8-(pyridin-4-yl)-2,3,5,6,7,8-hexahydro-1H-pyrazolo[1,5-d][1,2,4]triazepine-2,5-diyl)diphenol (4e)

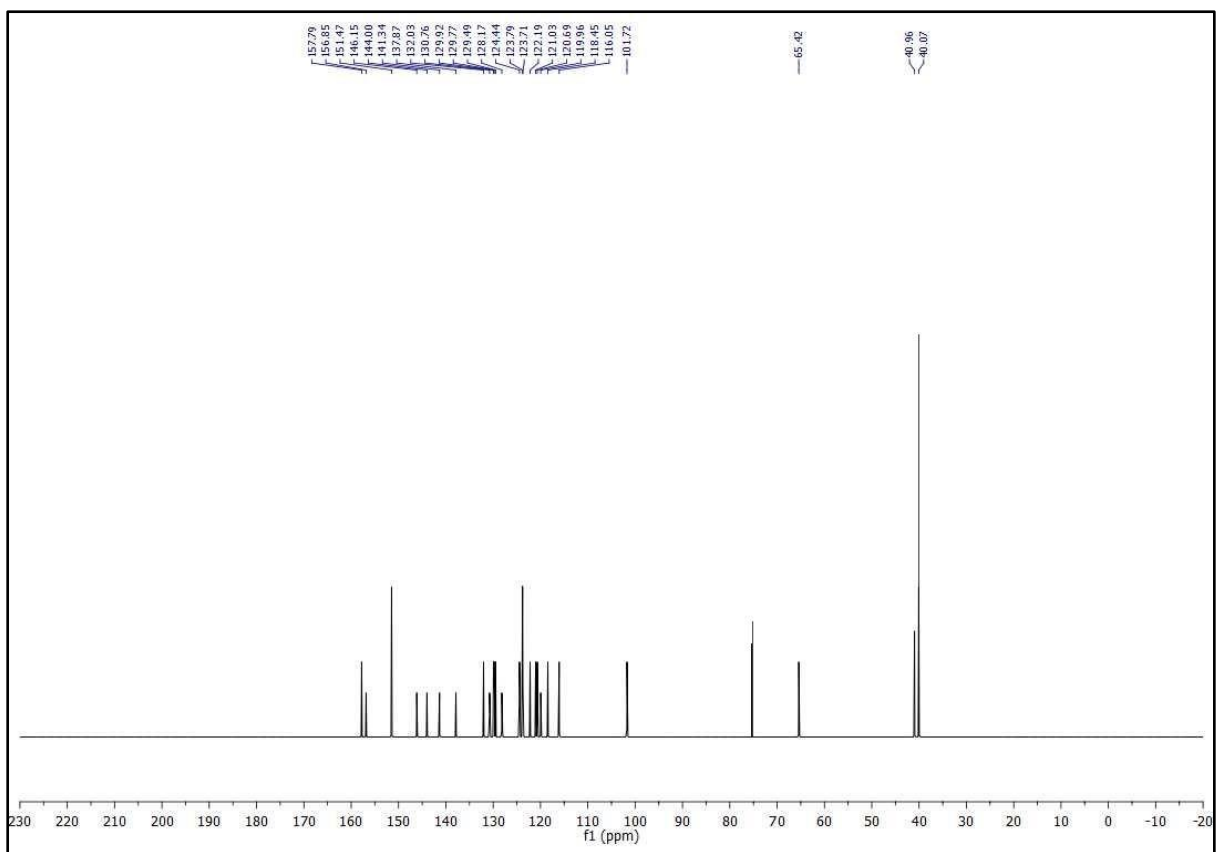

**Figure S11.**  $^1\text{H}$  NMR of 2,5-bis(4-(dimethylamino)phenyl)-1-(2,4-dinitrophenyl)-8-(pyridin-4-yl)-2,3,5,6,7,8-hexahydro-1H-pyrazolo[1,5-d][1,2,4]triazepin-8-ol (4f)

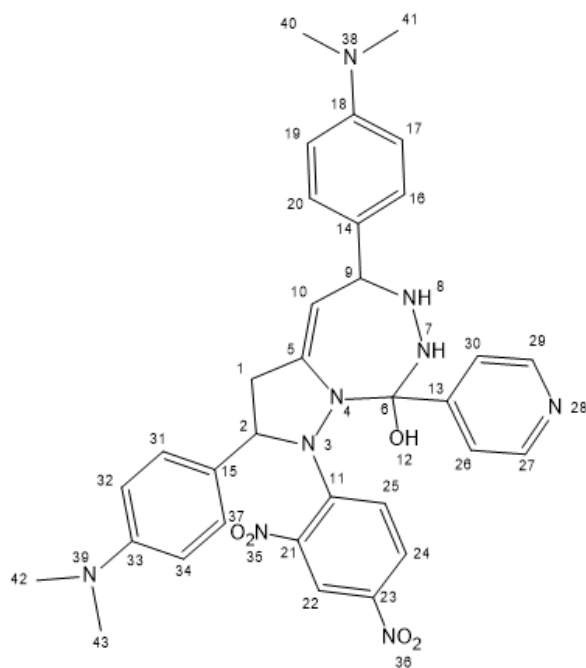

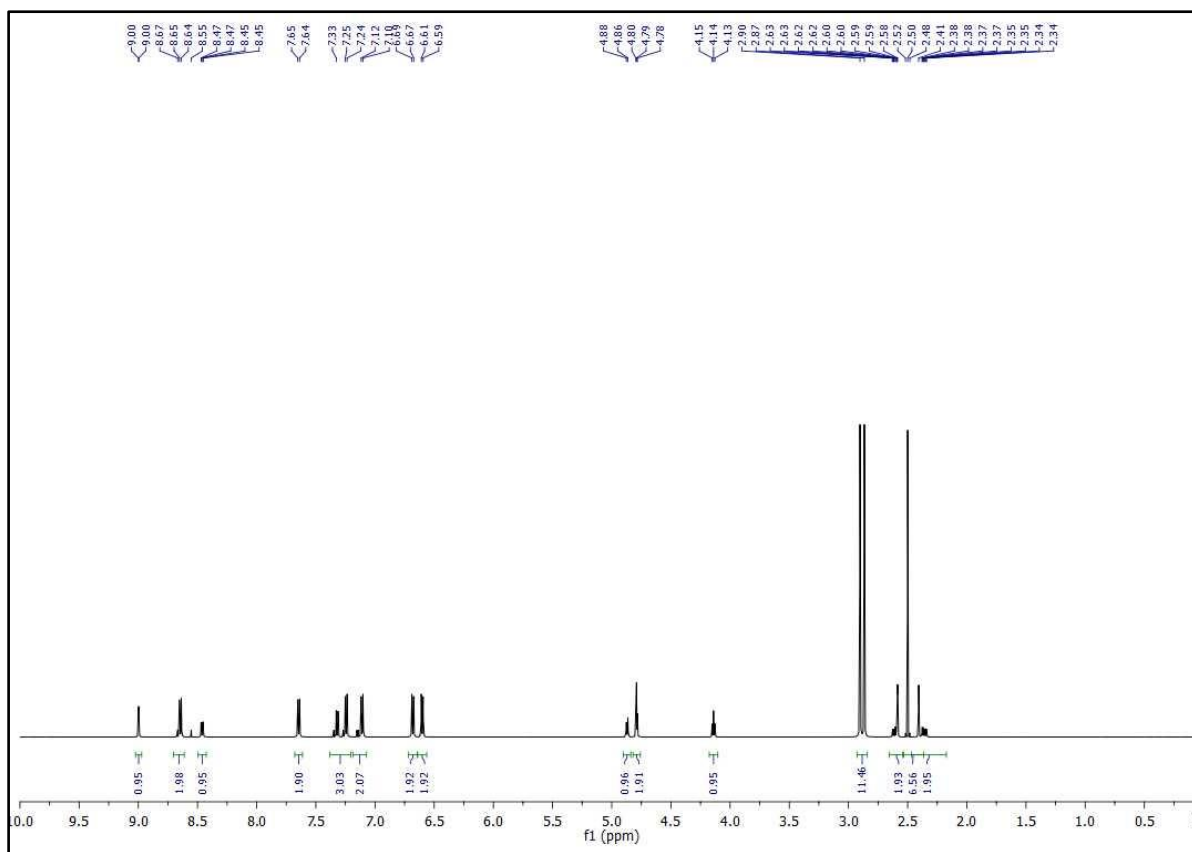

**Figure S12.**  $^{13}\text{C}$  NMR of 2,5-bis(4-(dimethylamino)phenyl)-1-(2,4-dinitrophenyl)-8-(pyridin-4-yl)-2,3,5,6,7,8-hexahydro-1H-pyrazolo[1,5-d][1,2,4]triazepin-8-ol (4f)

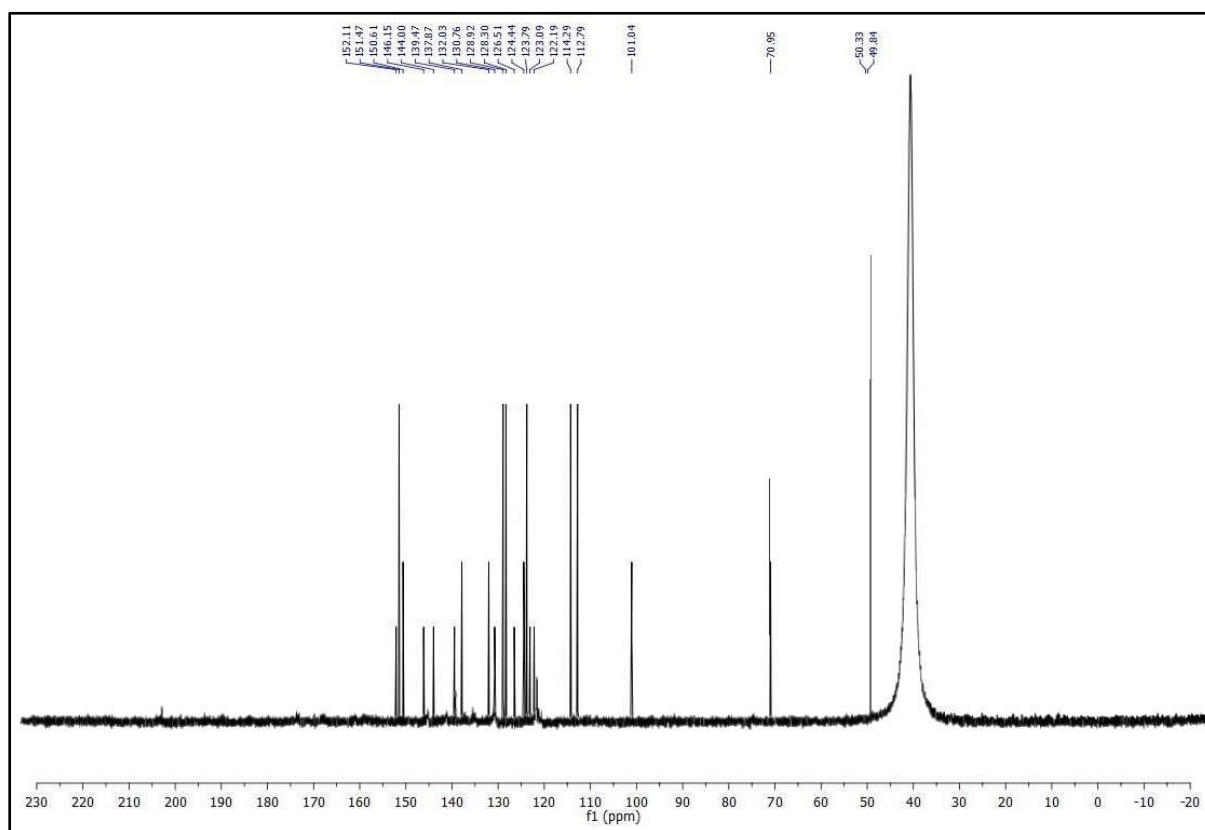

**Figure S13.**  $^1\text{H}$  NMR of 2,5-bis(4-chlorophenyl)-1-(2,4-dinitrophenyl)-8-(pyridin-4-yl)-2,3,5,6,7,8-hexahydro-1H-pyrazolo[1,5-d][1,2,4]triazepin-8-ol (4g)

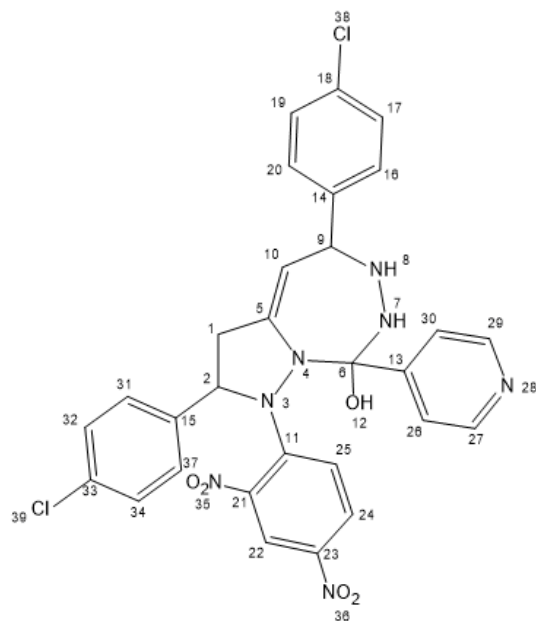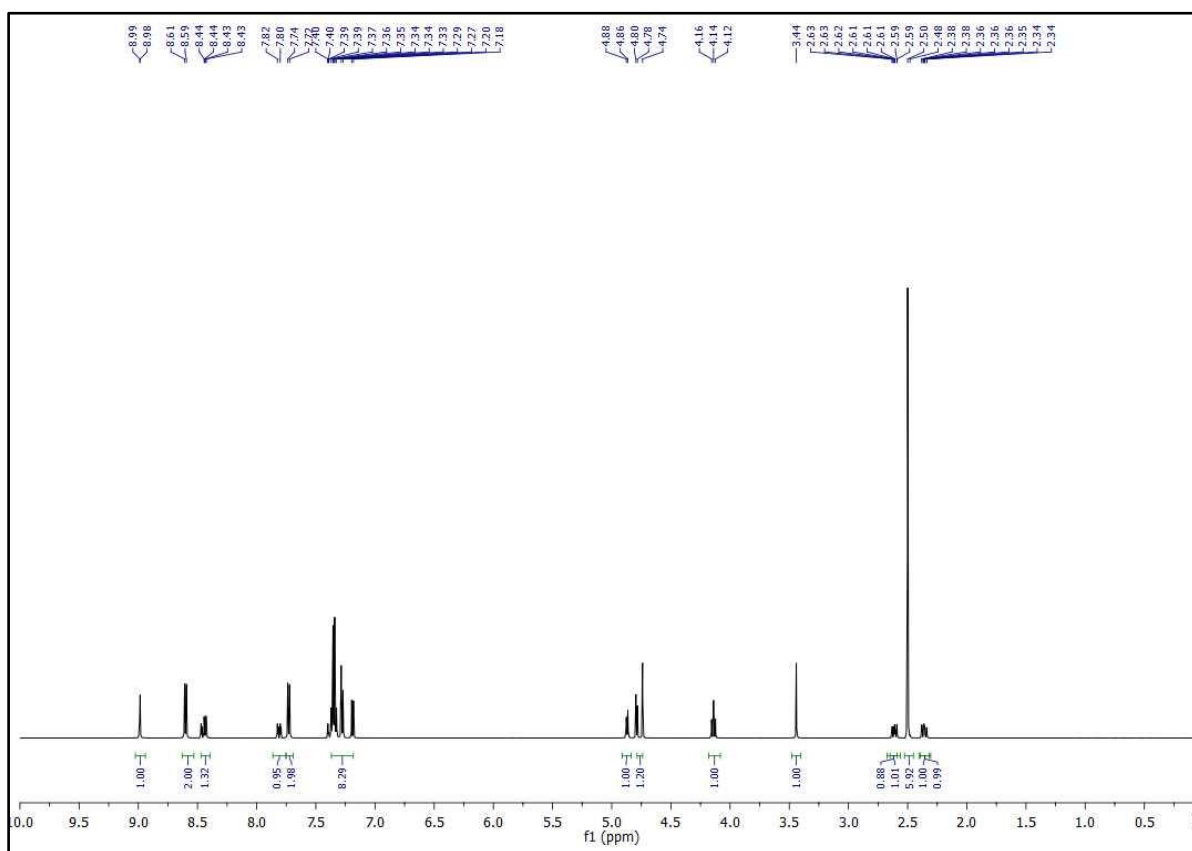

**Figure S14.**  $^{13}\text{C}$  NMR of 2,5-bis(4-chlorophenyl)-1-(2,4-dinitrophenyl)-8-(pyridin-4-yl)-2,3,5,6,7,8-hexahydro-1H-pyrazolo[1,5-d][1,2,4]triazepin-8-ol (4g)

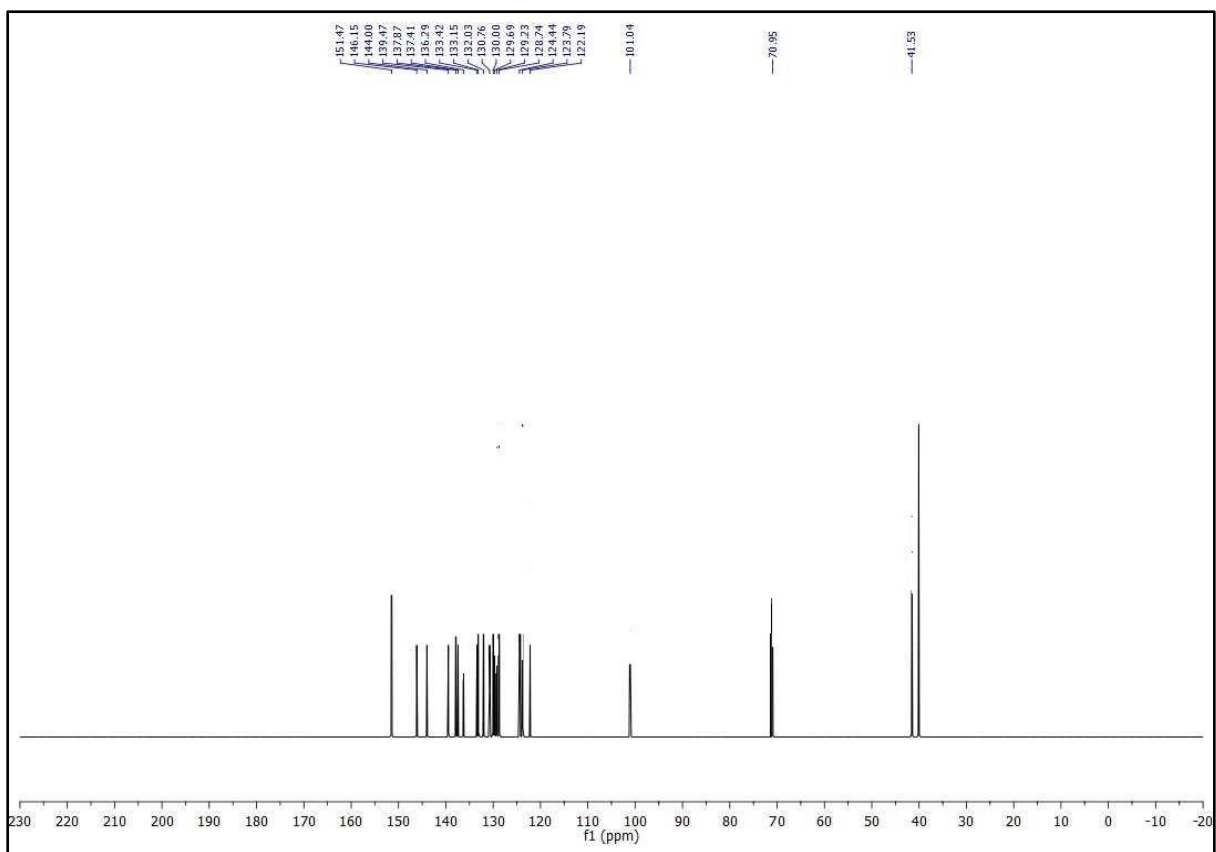

**Figure S15.**  $^1\text{H}$  NMR of 8-hydroxy-2,5-diphenyl-8-(pyridin-4-yl)-2,3,5,6,7,8-hexahydro-1H-pyrazolo[1,5-d][1,2,4] triazepine-1-carboxamide (4h)

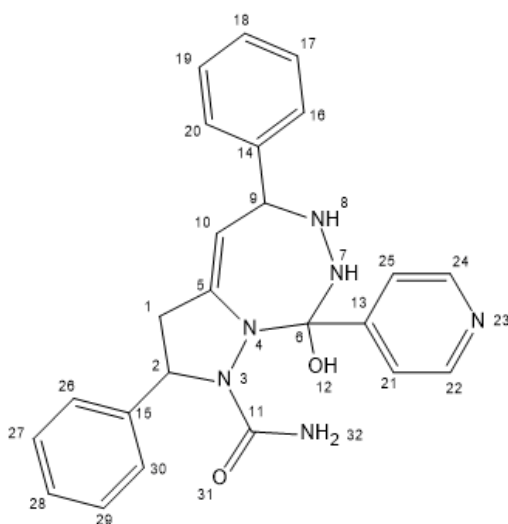

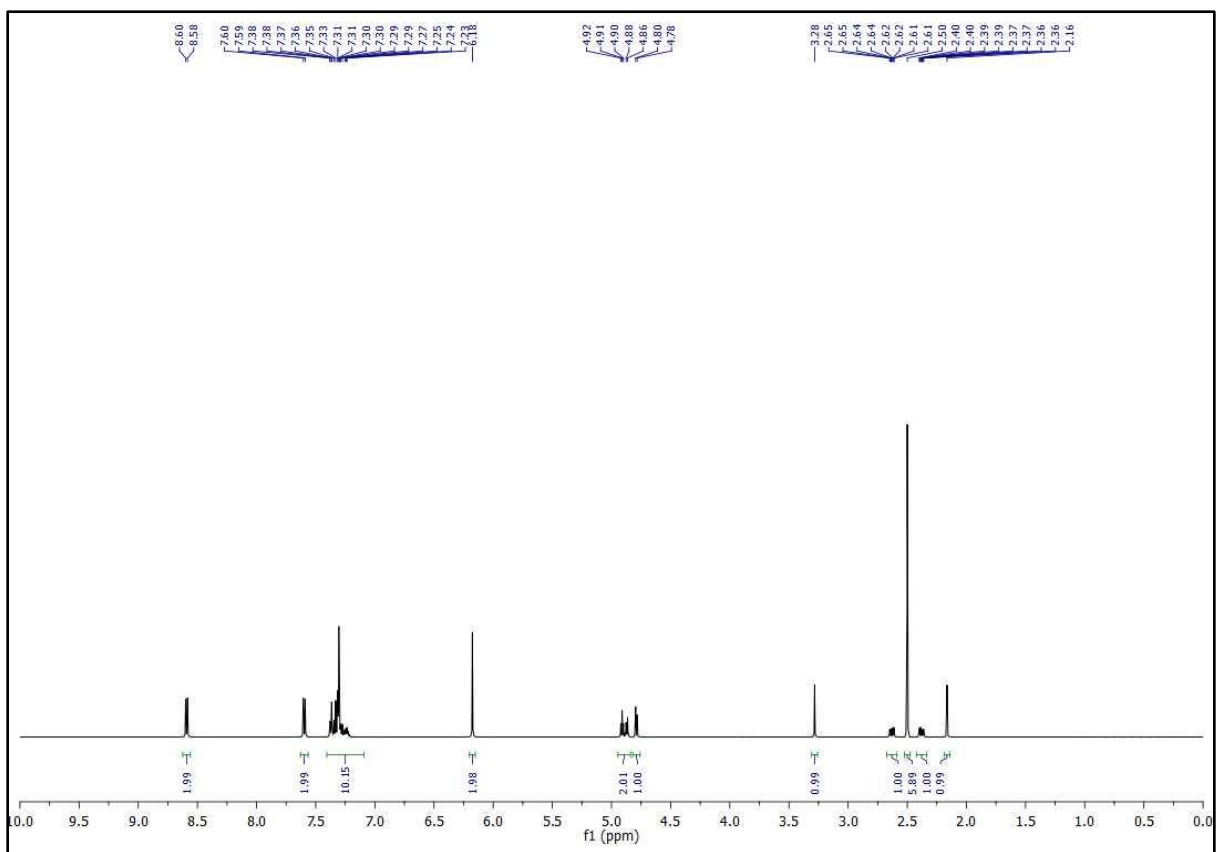

**Figure S16.**  $^{13}\text{C}$  NMR of 8-hydroxy-2,5-diphenyl-8-(pyridin-4-yl)-2,3,5,6,7,8-hexahydro-1H-pyrazolo[1,5-d][1,2,4] triazepine-1-carboxamide (4h)

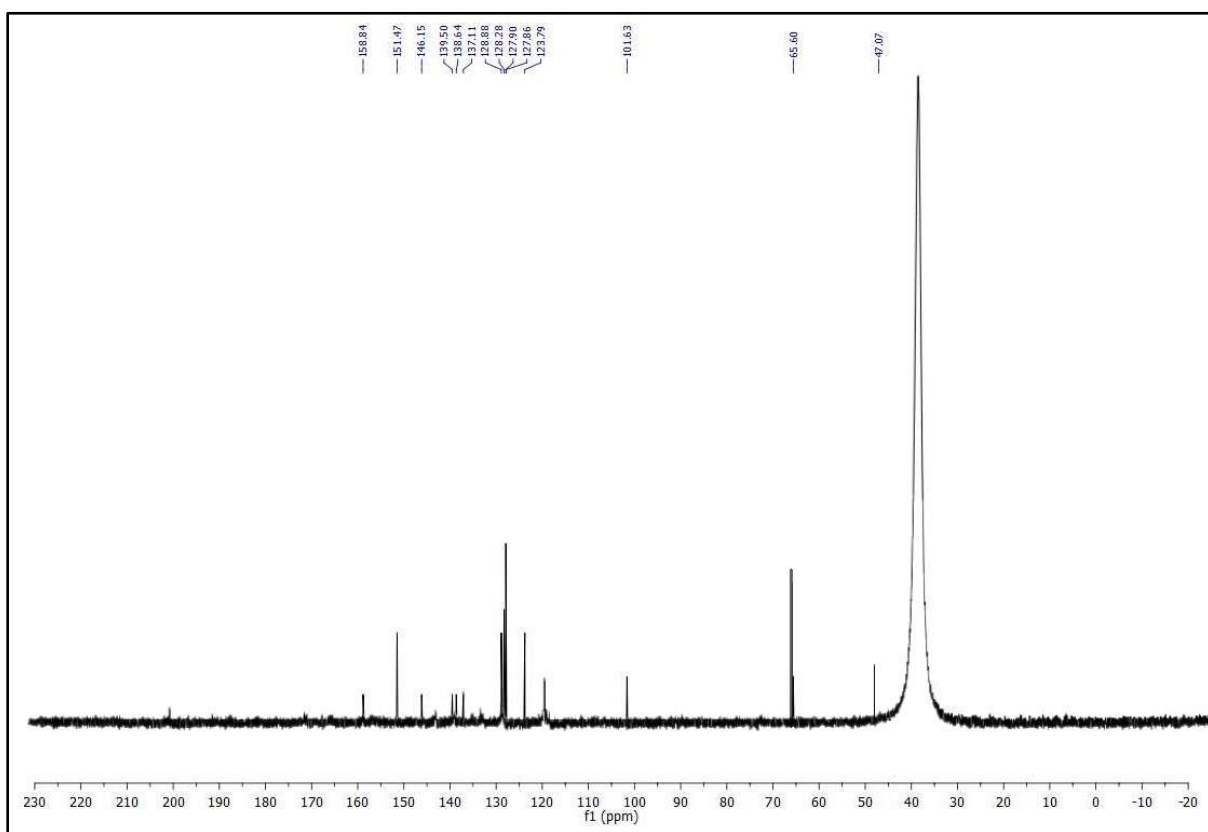

**Figure S17.**  $^1\text{H}$  NMR of 8-hydroxy-2,5-bis(4-hydroxyphenyl)-8-(pyridin-4-yl)-2,3,5,6,7,8-hexahydro-1H-pyrazolo[1,5-d][1,2,4]triazepine-1-carboxamide (4i)

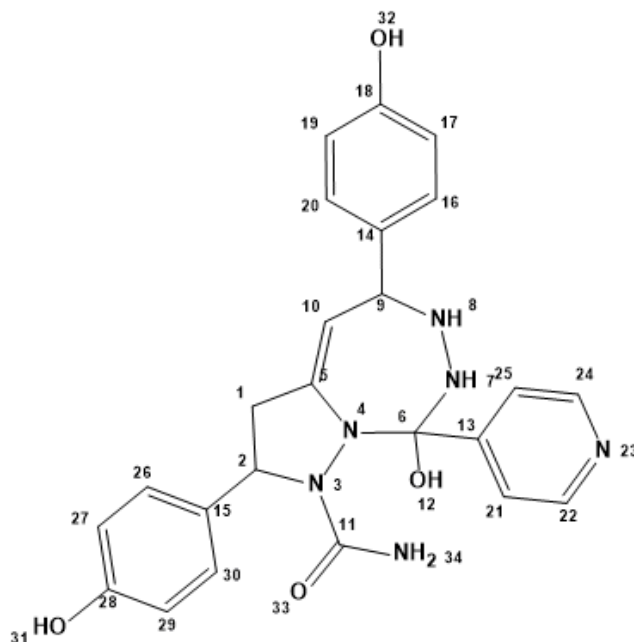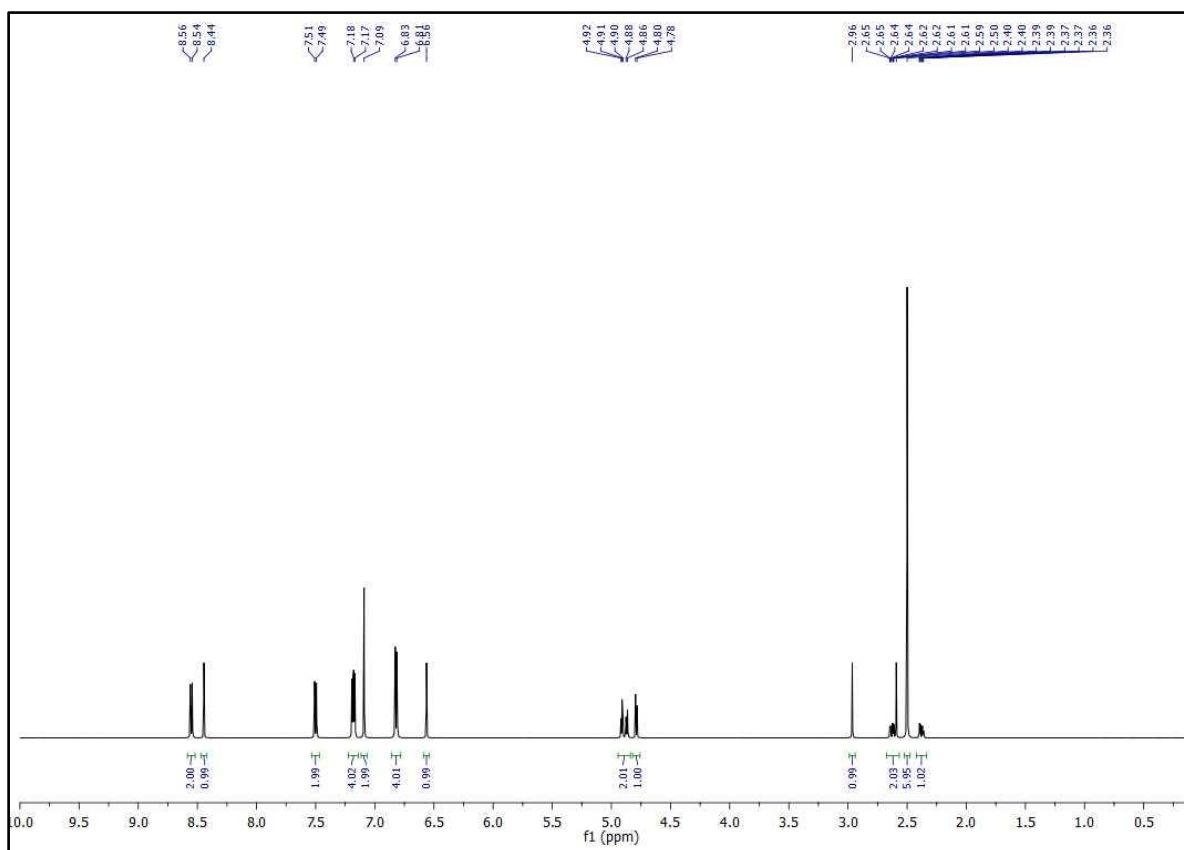

**Figure S18.**  $^{13}\text{C}$  NMR of 8-hydroxy-2,5-bis(4-hydroxyphenyl)-8-(pyridin-4-yl)-2,3,5,6,7,8-hexahydro-1H-pyrazolo[1,5-d][1,2,4]triazepine-1-carboxamide (4i)

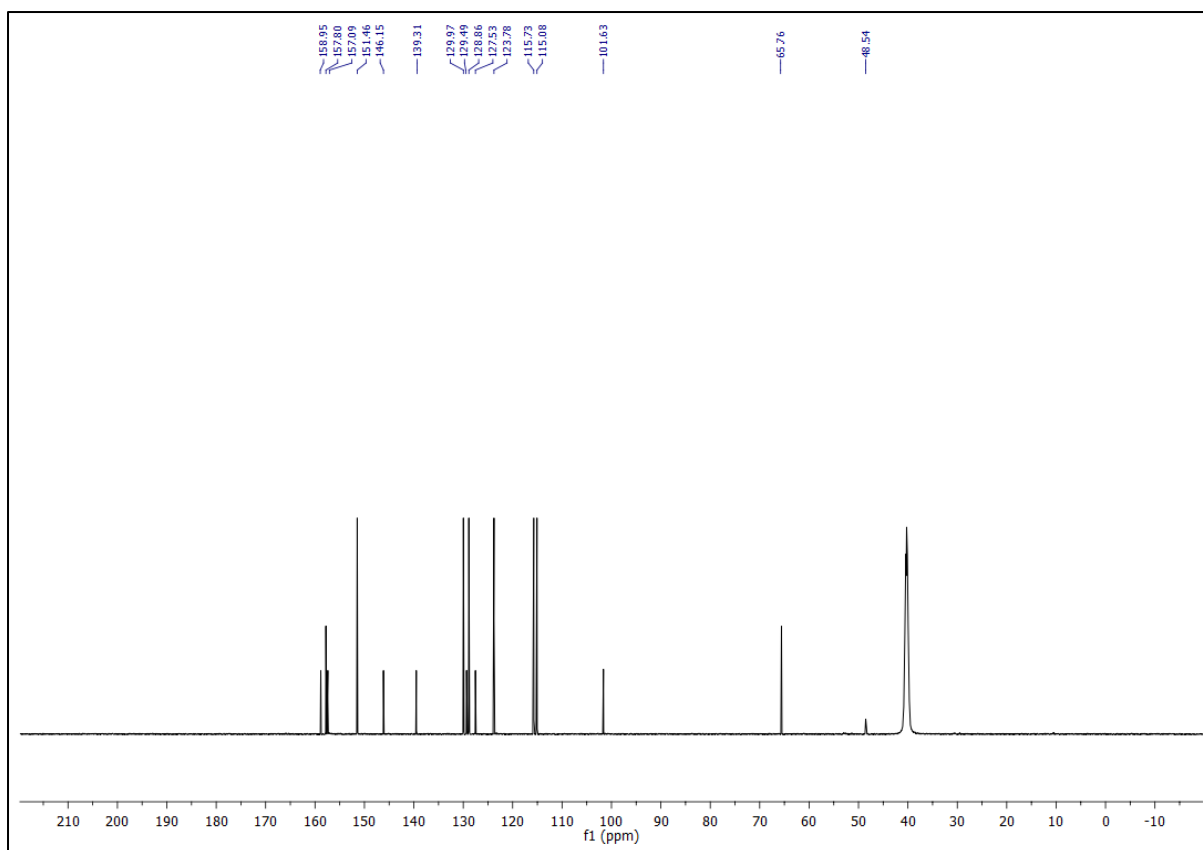

**Figure S19.**  $^1\text{H}$  NMR of 8-hydroxy-2,5-bis(4-nitrophenyl)-8-(pyridin-4-yl)-2,3,5,6,7,8-hexahydro-1H-pyrazolo[1,5-d][1,2,4]triazepine-1-carboxamide (4j)

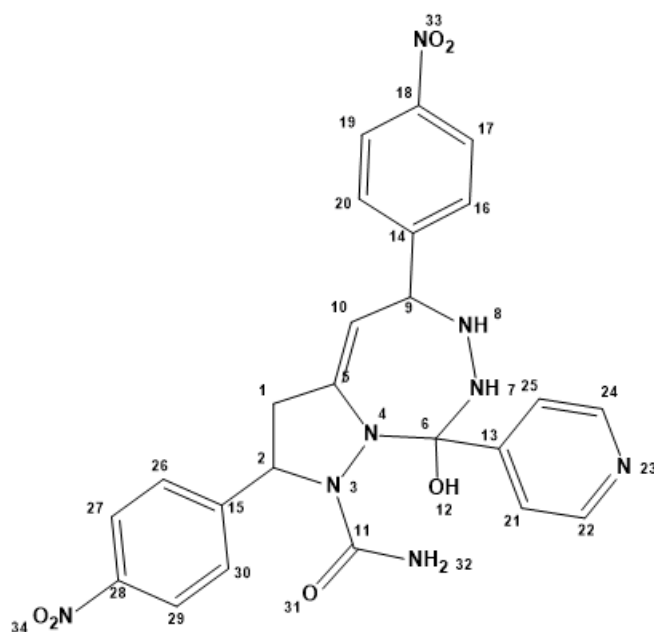

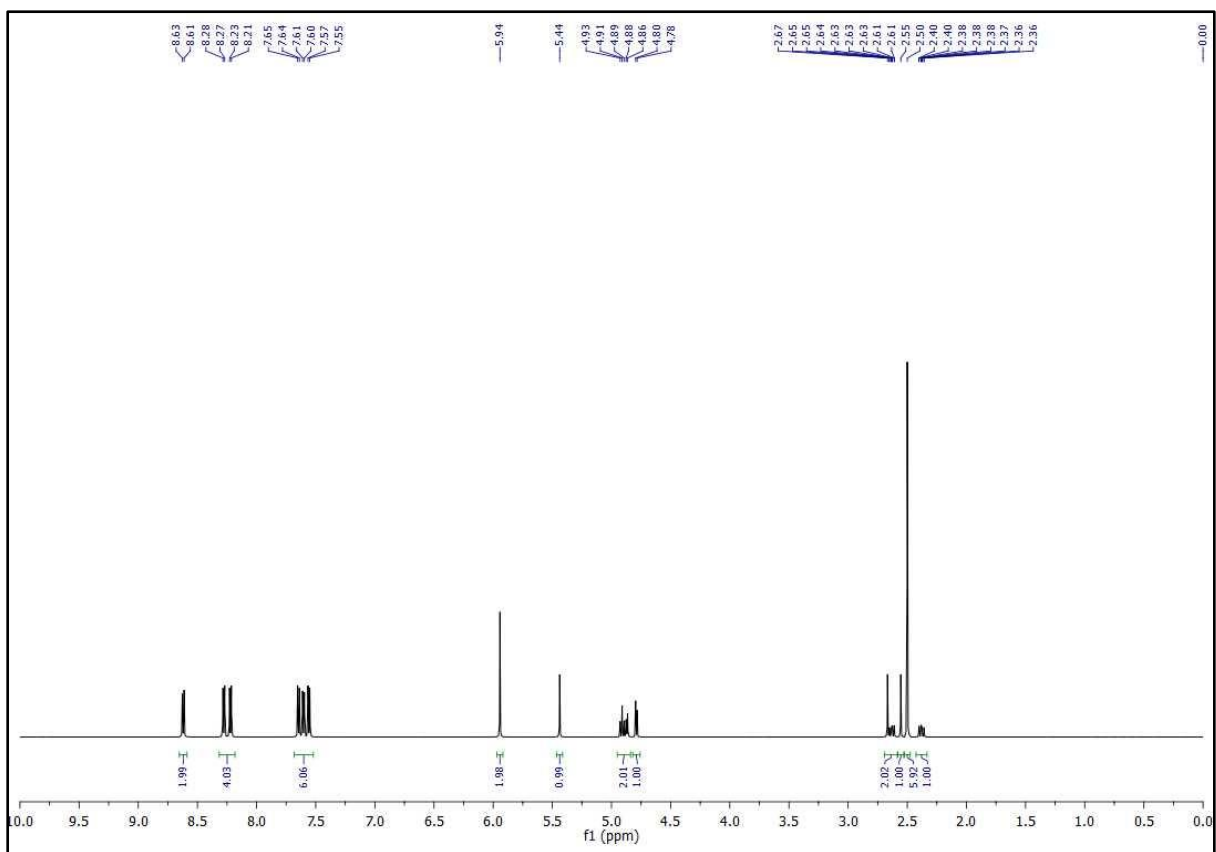

**Figure S20.**  $^1\text{H}$  NMR of 8-hydroxy-2,5-bis(4-nitrophenyl)-8-(pyridin-4-yl)-2,3,5,6,7,8-hexahydro-1H-pyrazolo[1,5-d][1,2,4]triazepine-1-carboxamide (4j)

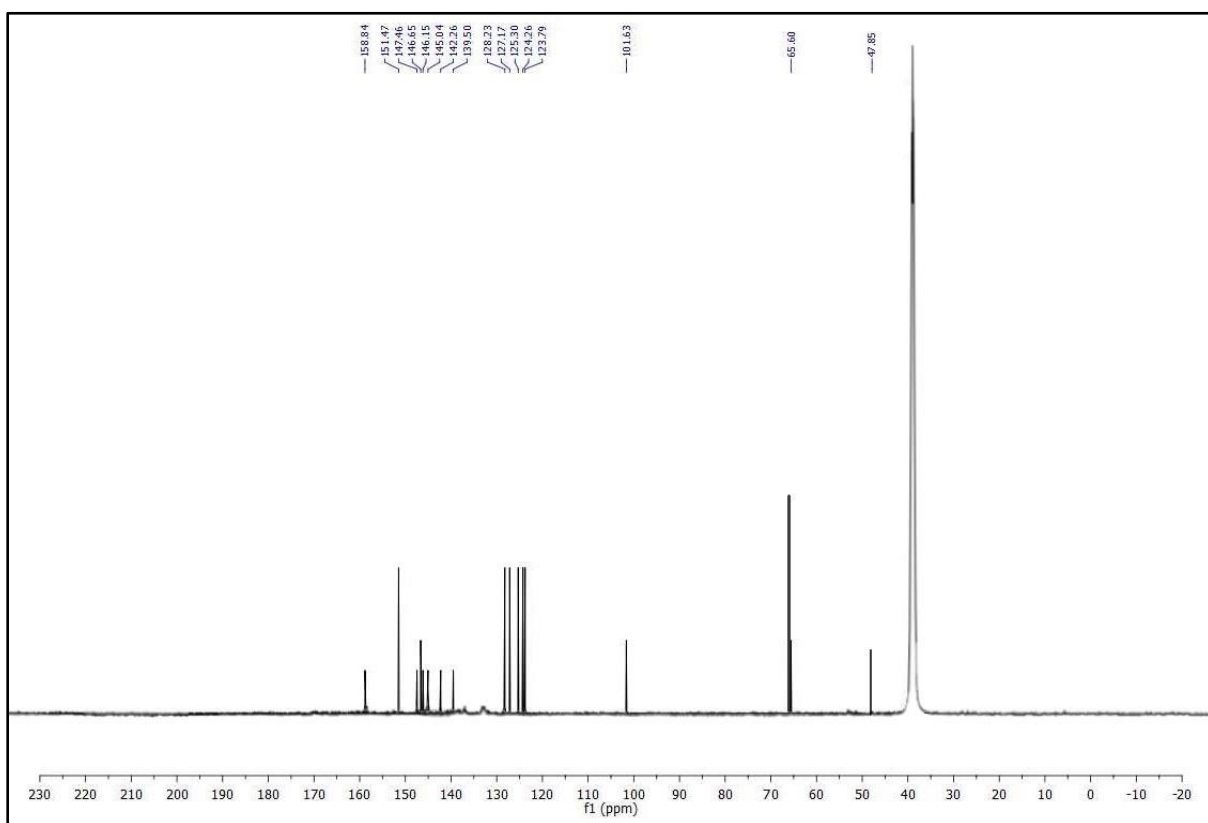

**Figure S21.**  $^1\text{H}$  NMR of 8-hydroxy-2,5-bis(4-hydroxy-3-methoxyphenyl)-8-(pyridin-4-yl)-2,3,5,6,7,8-hexahydro-1H-pyrazolo[1,5-d][1,2,4]triazepine-1-carboxamide (4k)

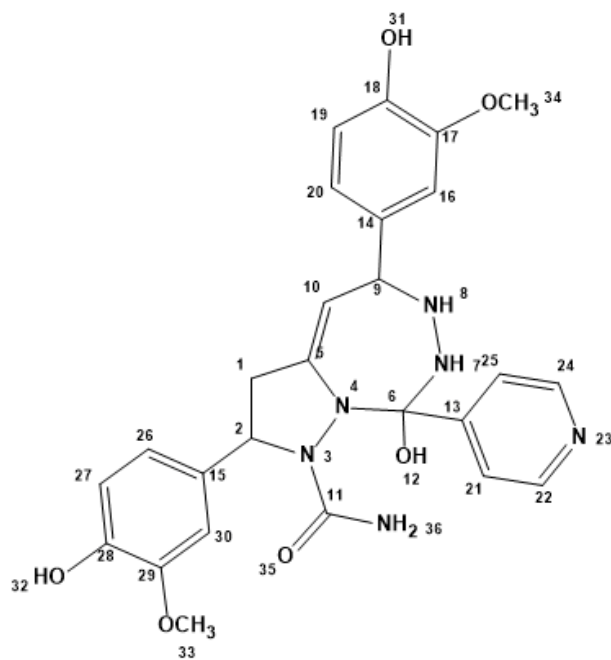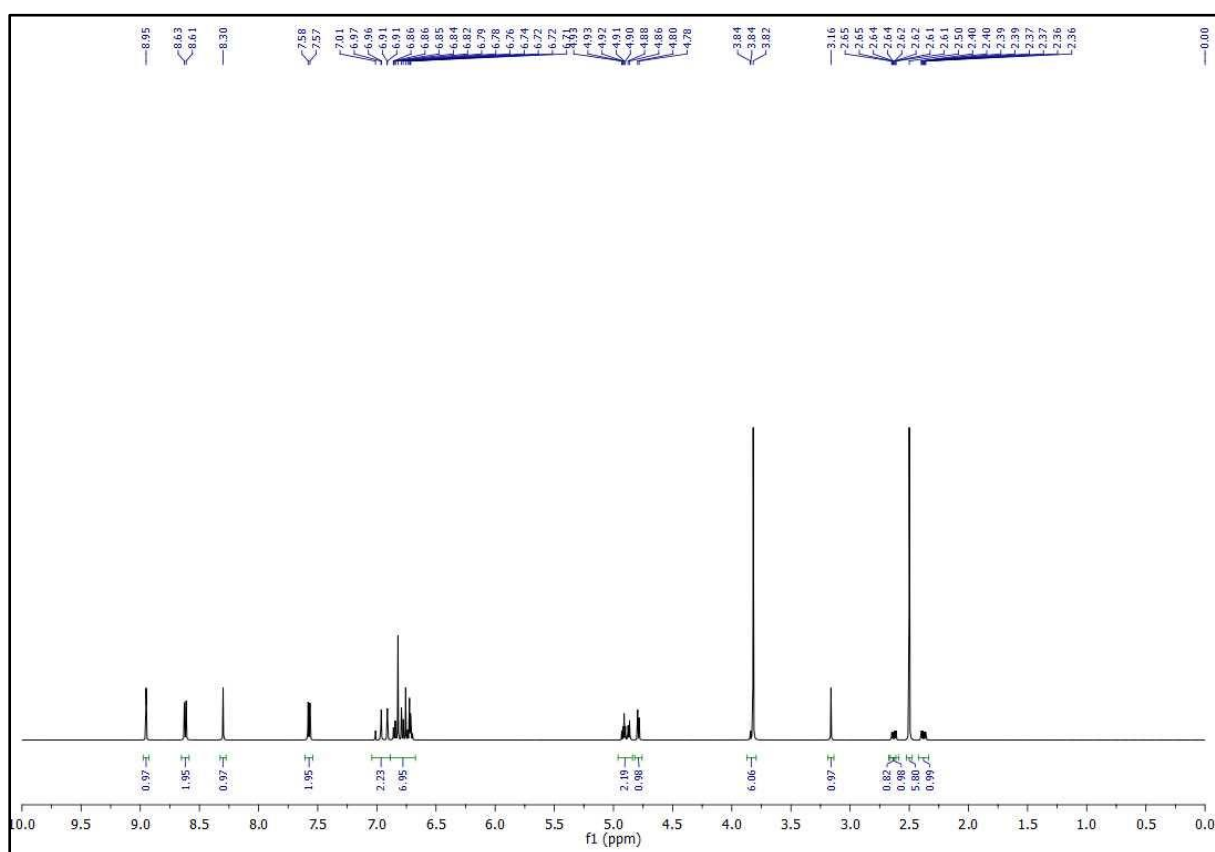

**Figure S22.**  $^{13}\text{C}$  NMR of 8-hydroxy-2,5-bis(4-hydroxy-3-methoxyphenyl)-8-(pyridin-4-yl)-2,3,5,6,7,8-hexahydro-1H-pyrazolo[1,5-d][1,2,4]triazepine-1-carboxamide (4k)

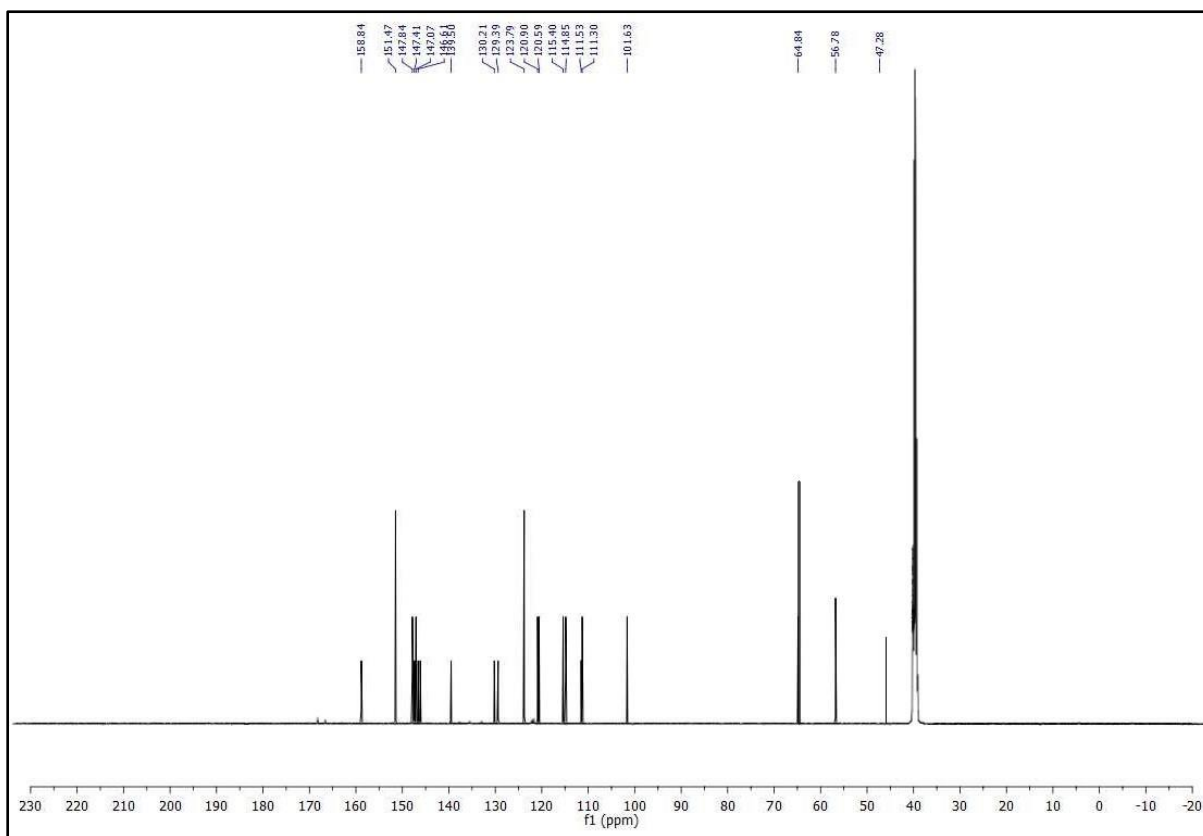

**Figure S23.**  $^1\text{H}$  NMR of 8-hydroxy-2,5-bis(2-hydroxyphenyl)-8-(pyridin-4-yl)-2,3,5,6,7,8-hexahydro-1H-pyrazolo[1,5-d][1,2,4]triazepine-1-carboxamide (4l)

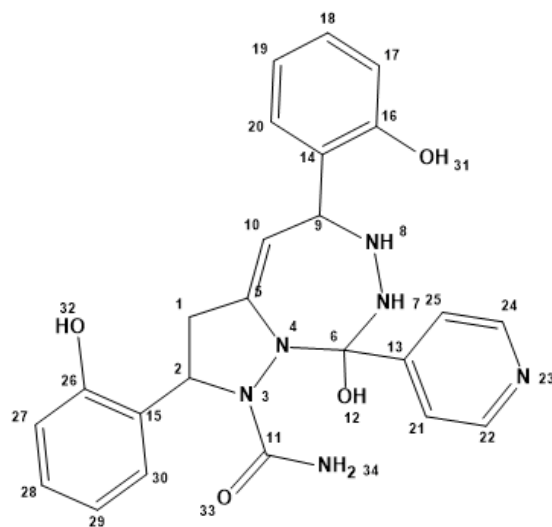

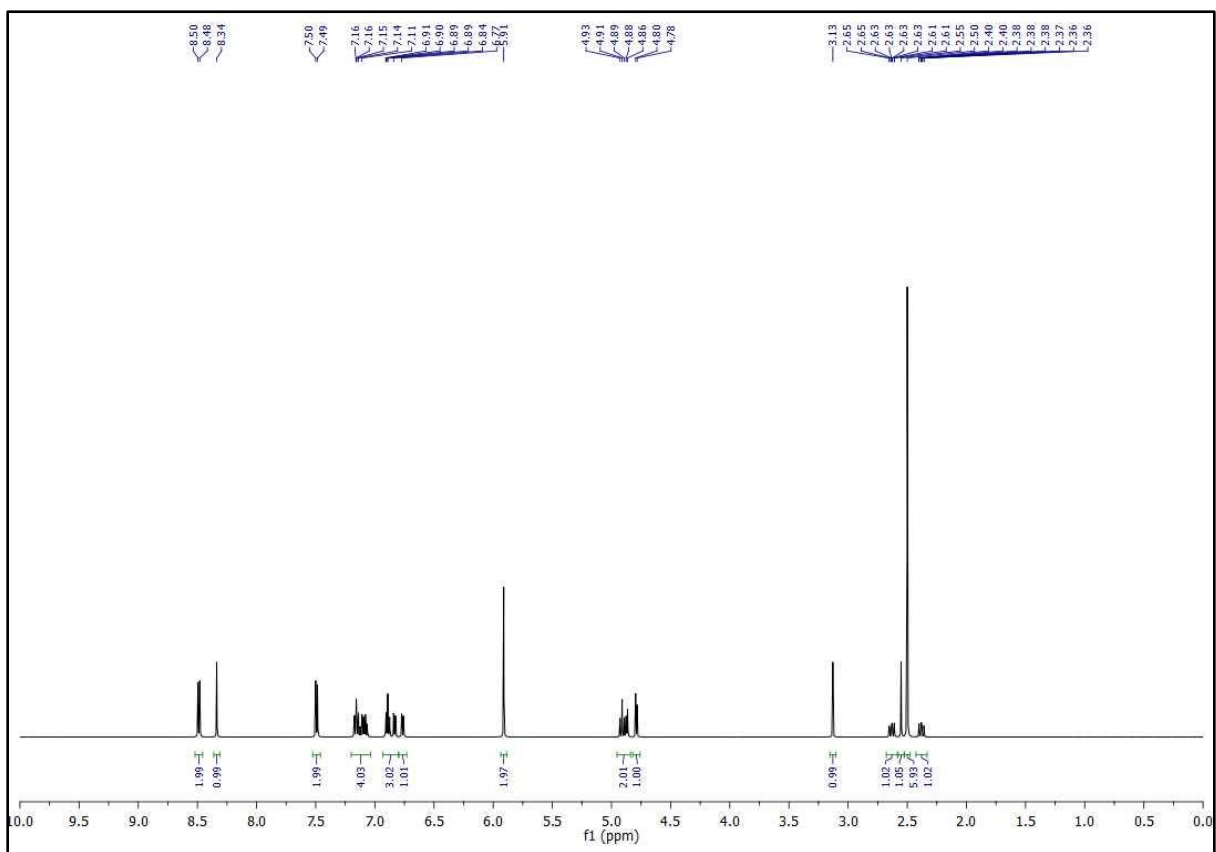

**Figure S24.**  $^1\text{H}$  NMR of 8-hydroxy-2,5-bis(2-hydroxyphenyl)-8-(pyridin-4-yl)-2,3,5,6,7,8-hexahydro-1H-pyrazolo[1,5-d][1,2,4]triazepine-1-carboxamide (4l)

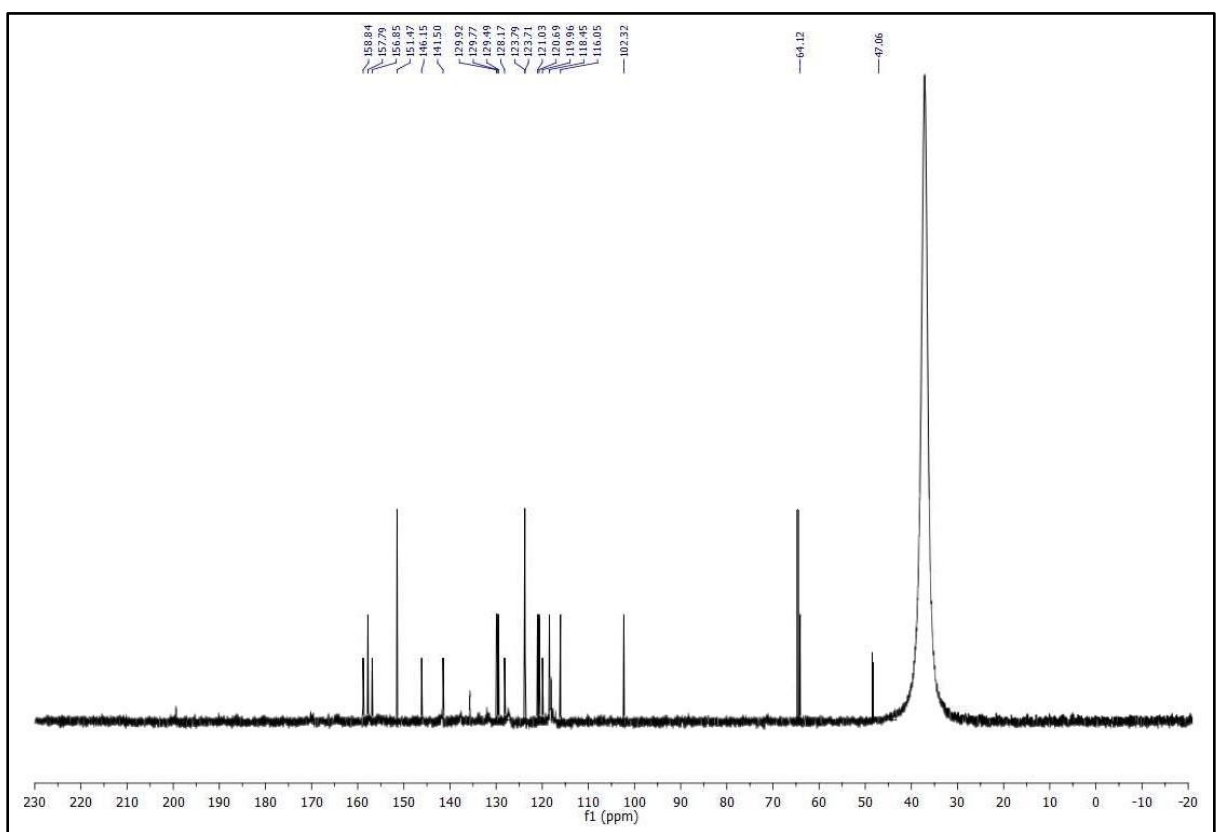



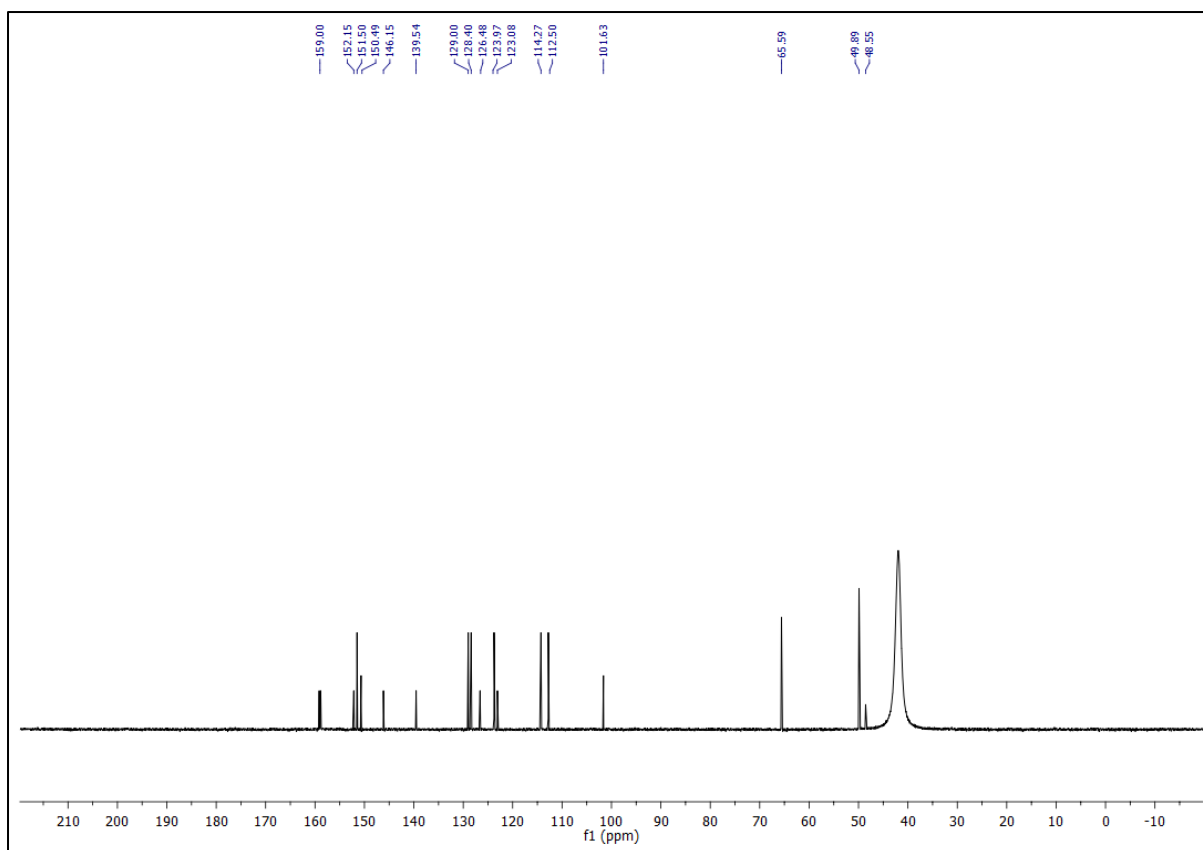

**Figure S27.**  $^1\text{H}$  NMR of 2,5-bis(4-chlorophenyl)-8-hydroxy-8-(pyridin-4-yl)-2,3,5,6,7,8-hexahydro-1H-pyrazolo[1,5-d][1,2,4]triazepine-1-carboxamide (4n)

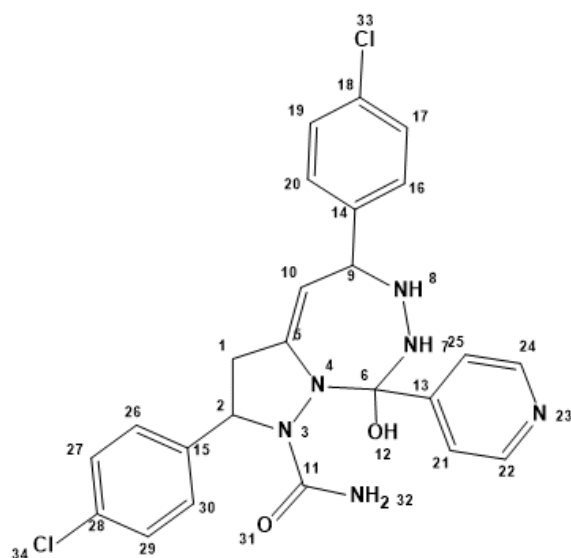

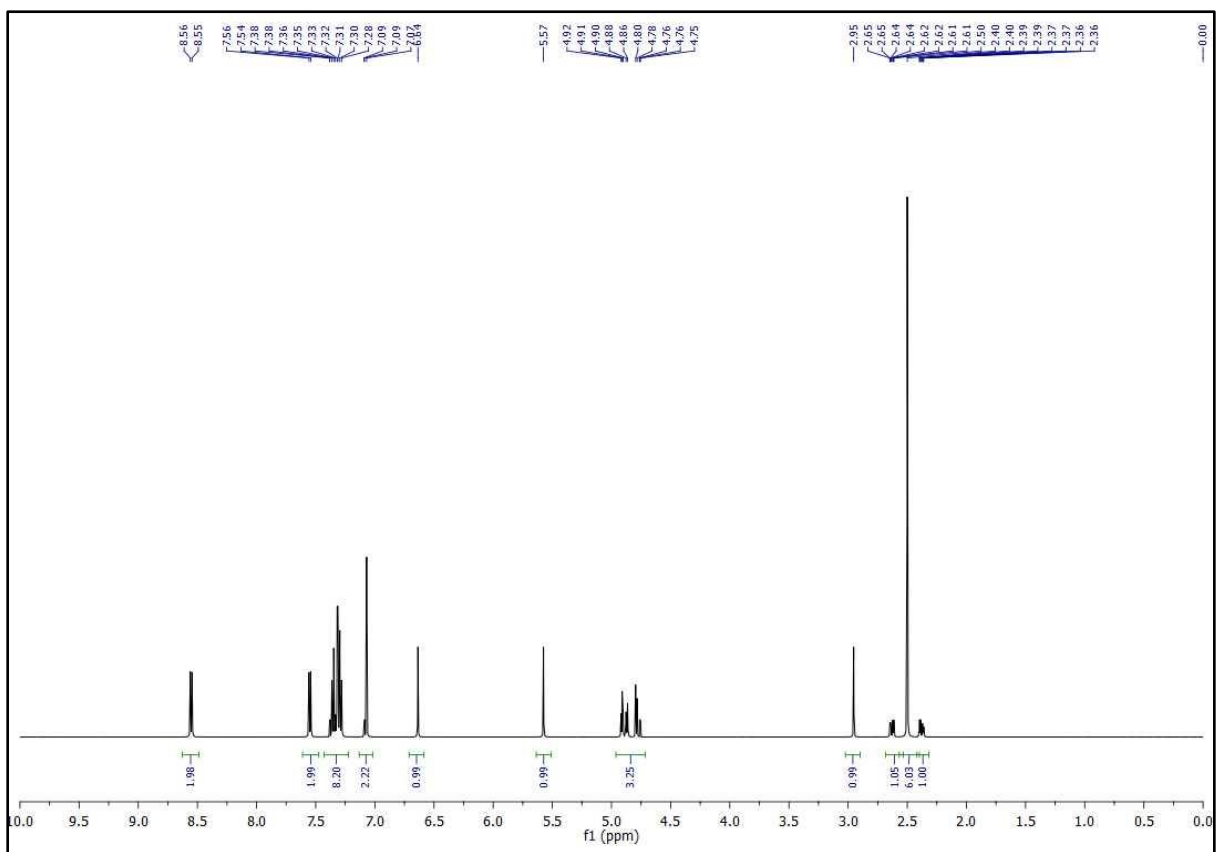

**Figure S28.**  $^{13}\text{C}$  NMR of 2,5-bis(4-chlorophenyl)-8-hydroxy-8-(pyridin-4-yl)-2,3,5,6,7,8-hexahydro-1H-pyrazolo[1,5-d][1,2,4]triazepine-1-carboxamide (4n)

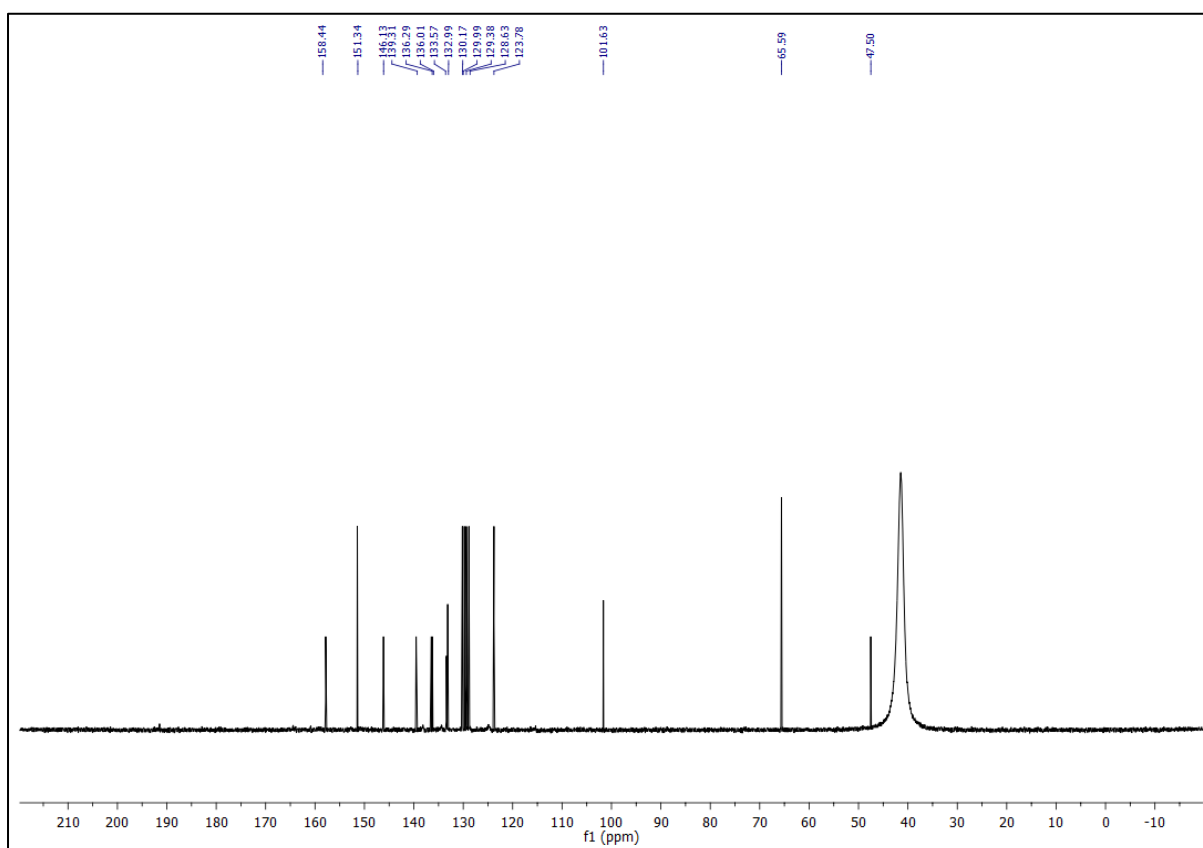

Figure S29.  $^1\text{H}$  NMR of 1,5-diphenylpenta-1,4-dien-3-one (1a)

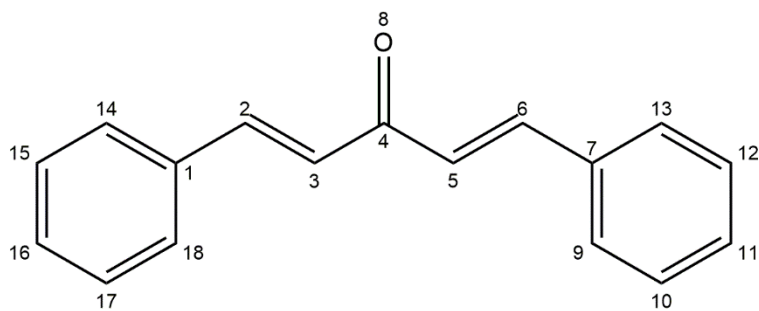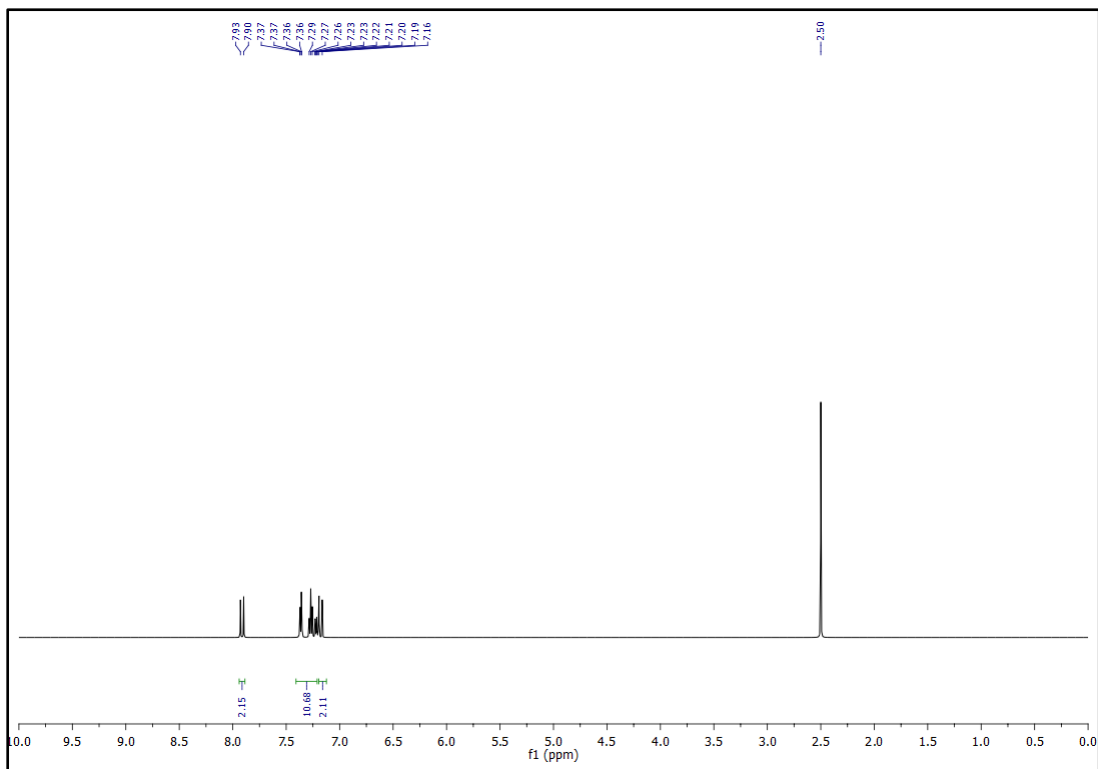

**Figure S30.**  $^{13}\text{C}$  NMR of 1,5-diphenylpenta-1,4-dien-3-one (1a)

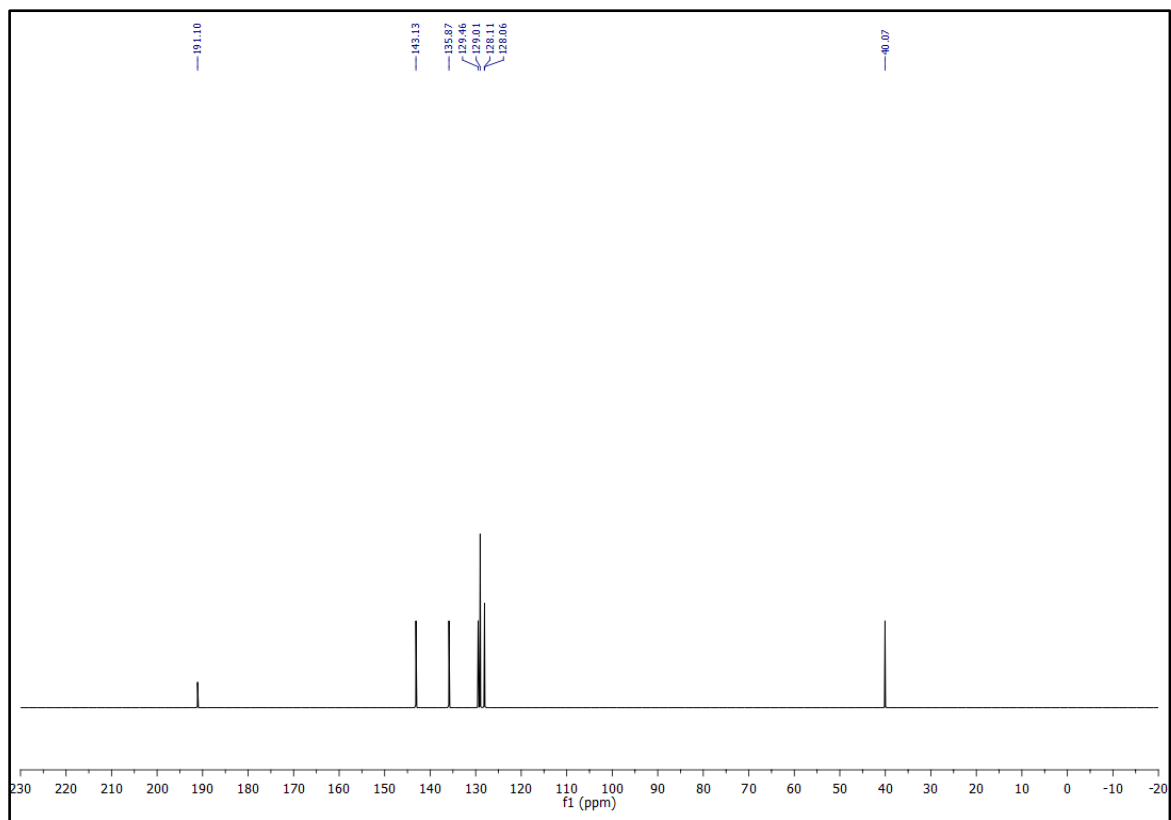

**Figure S31.**  $^1\text{H}$  NMR of 1,5-bis(4-hydroxyphenyl)penta-1,4-dien-3-one (1b)

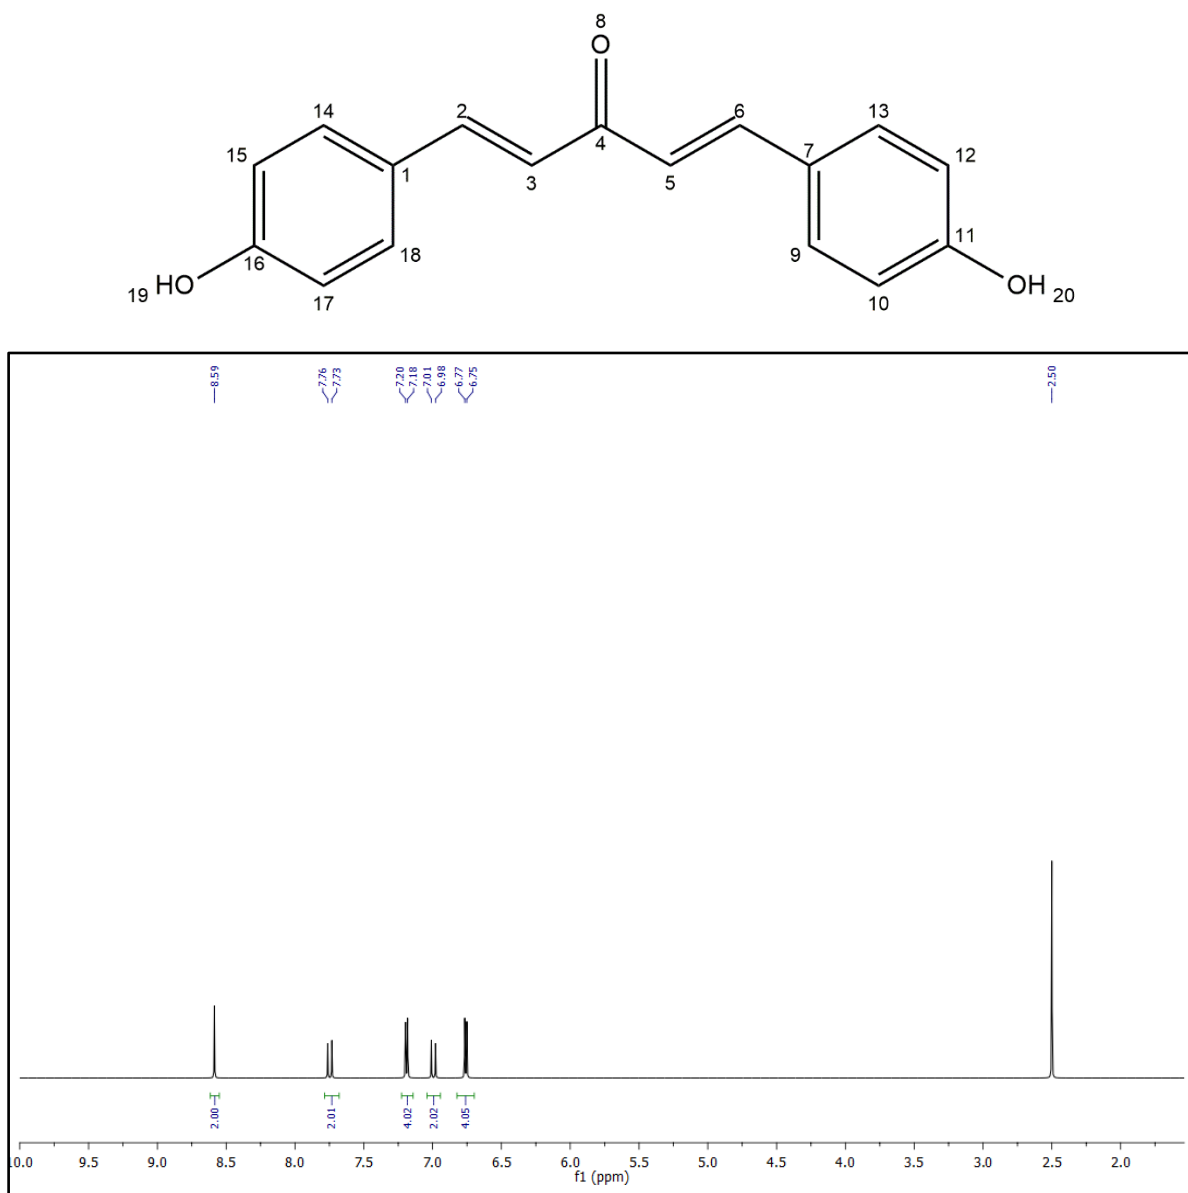

**Figure S32.**  $^{13}\text{C}$  NMR of 1,5-bis(4-hydroxyphenyl)penta-1,4-dien-3-one (1b)

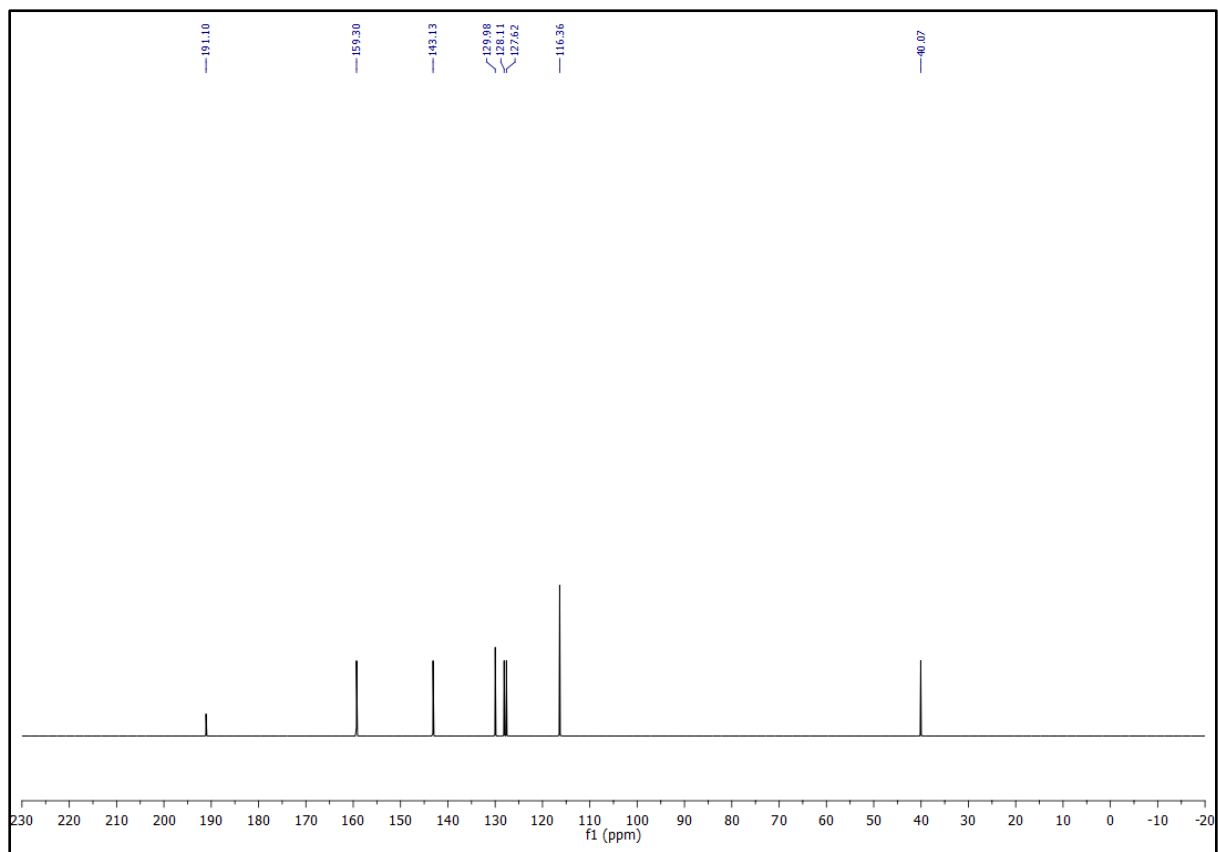

**Figure S33.**  $^1\text{H}$  NMR of 1,5-bis(4-nitrophenyl)penta-1,4-dien-3-one (1c)

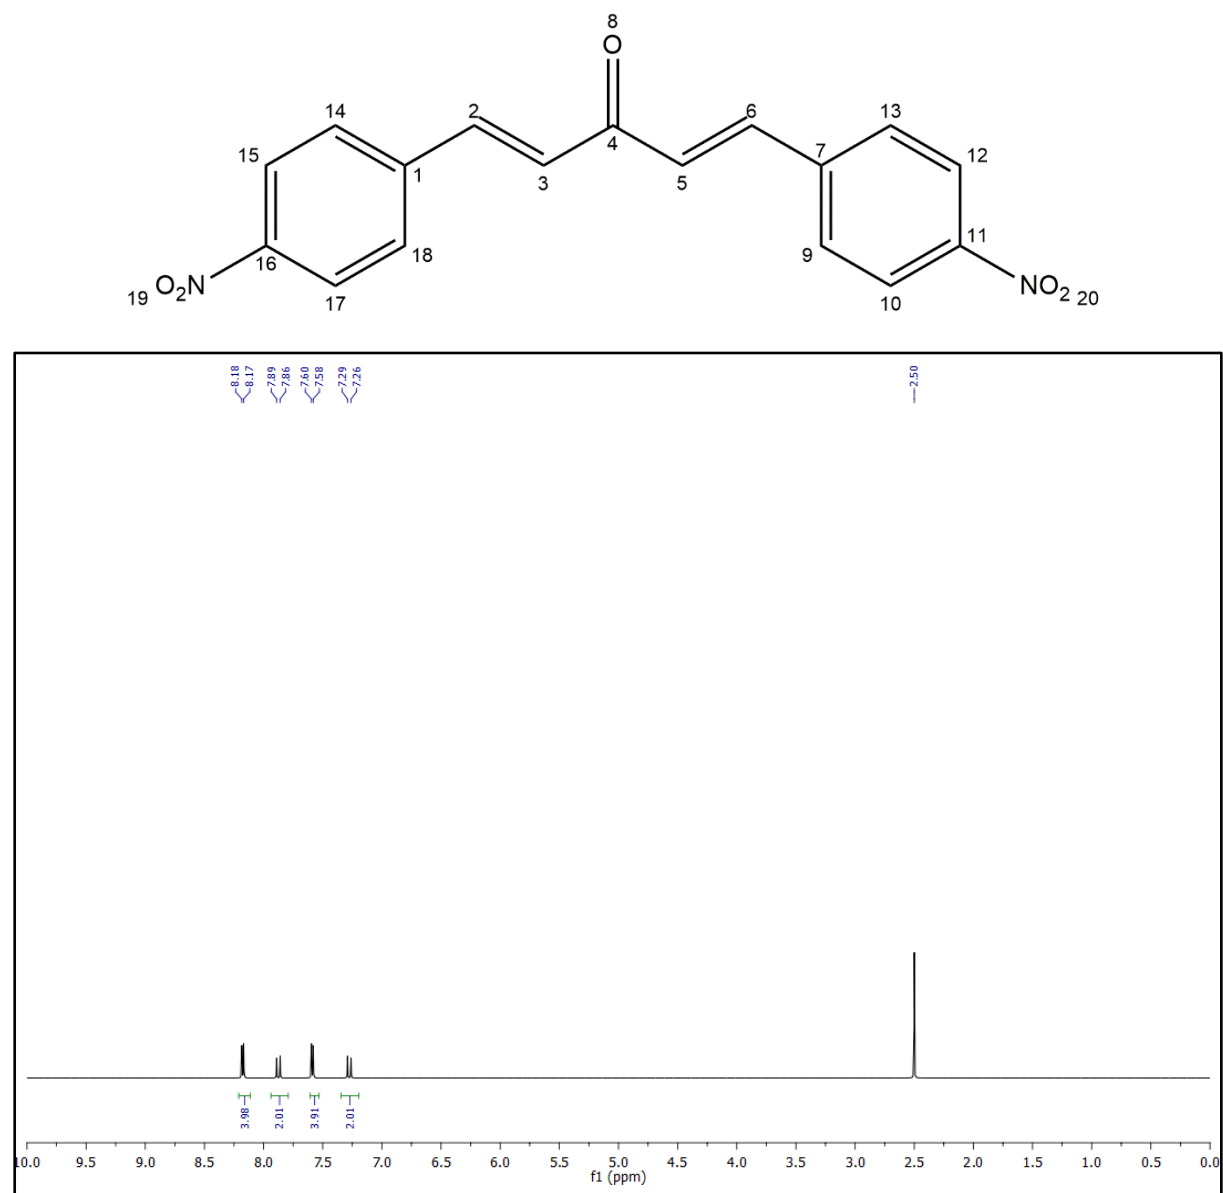

**Figure S34.**  $^{13}\text{C}$  NMR of 1,5-bis(4-nitrophenyl)penta-1,4-dien-3-one (1c)

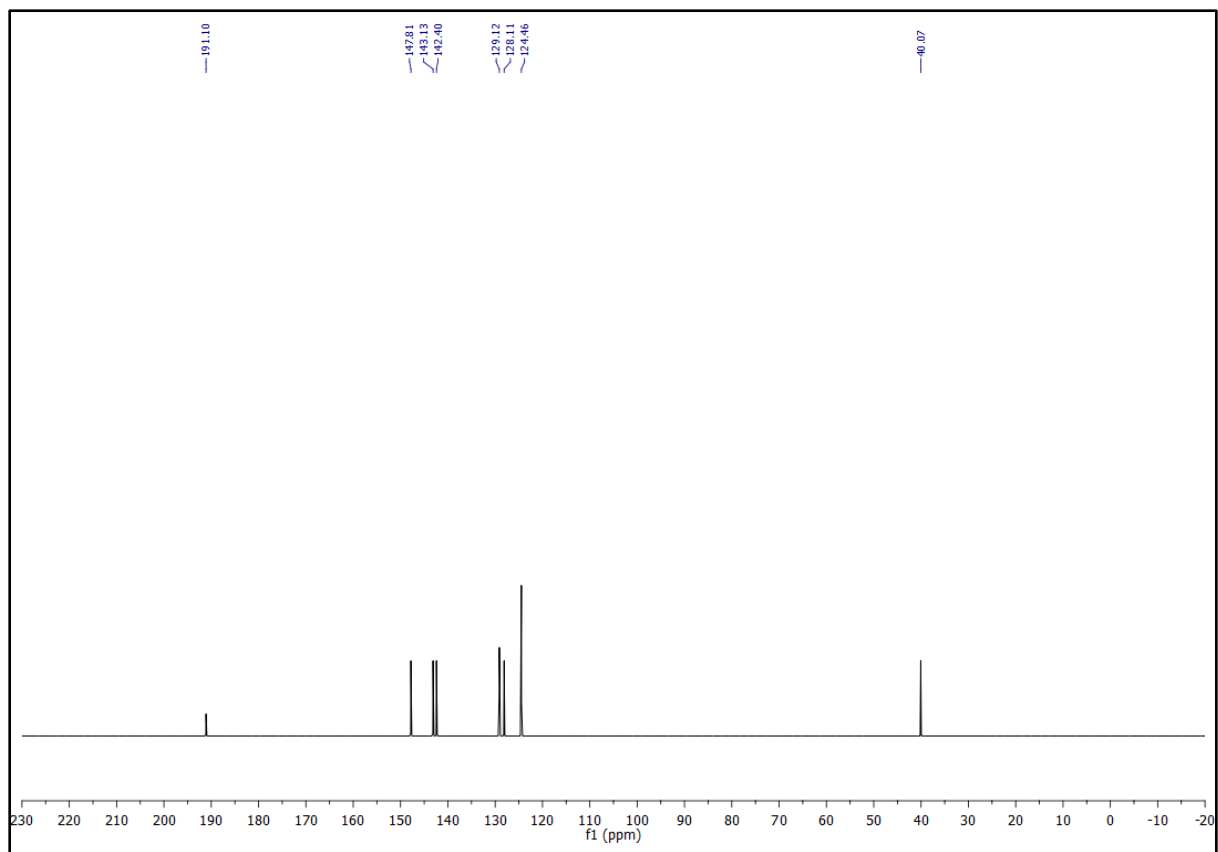

Figure S35. <sup>1</sup>H NMR of 1,5-bis(4-hydroxy-3-methoxyphenyl)penta-1,4-dien-3-one (1d)

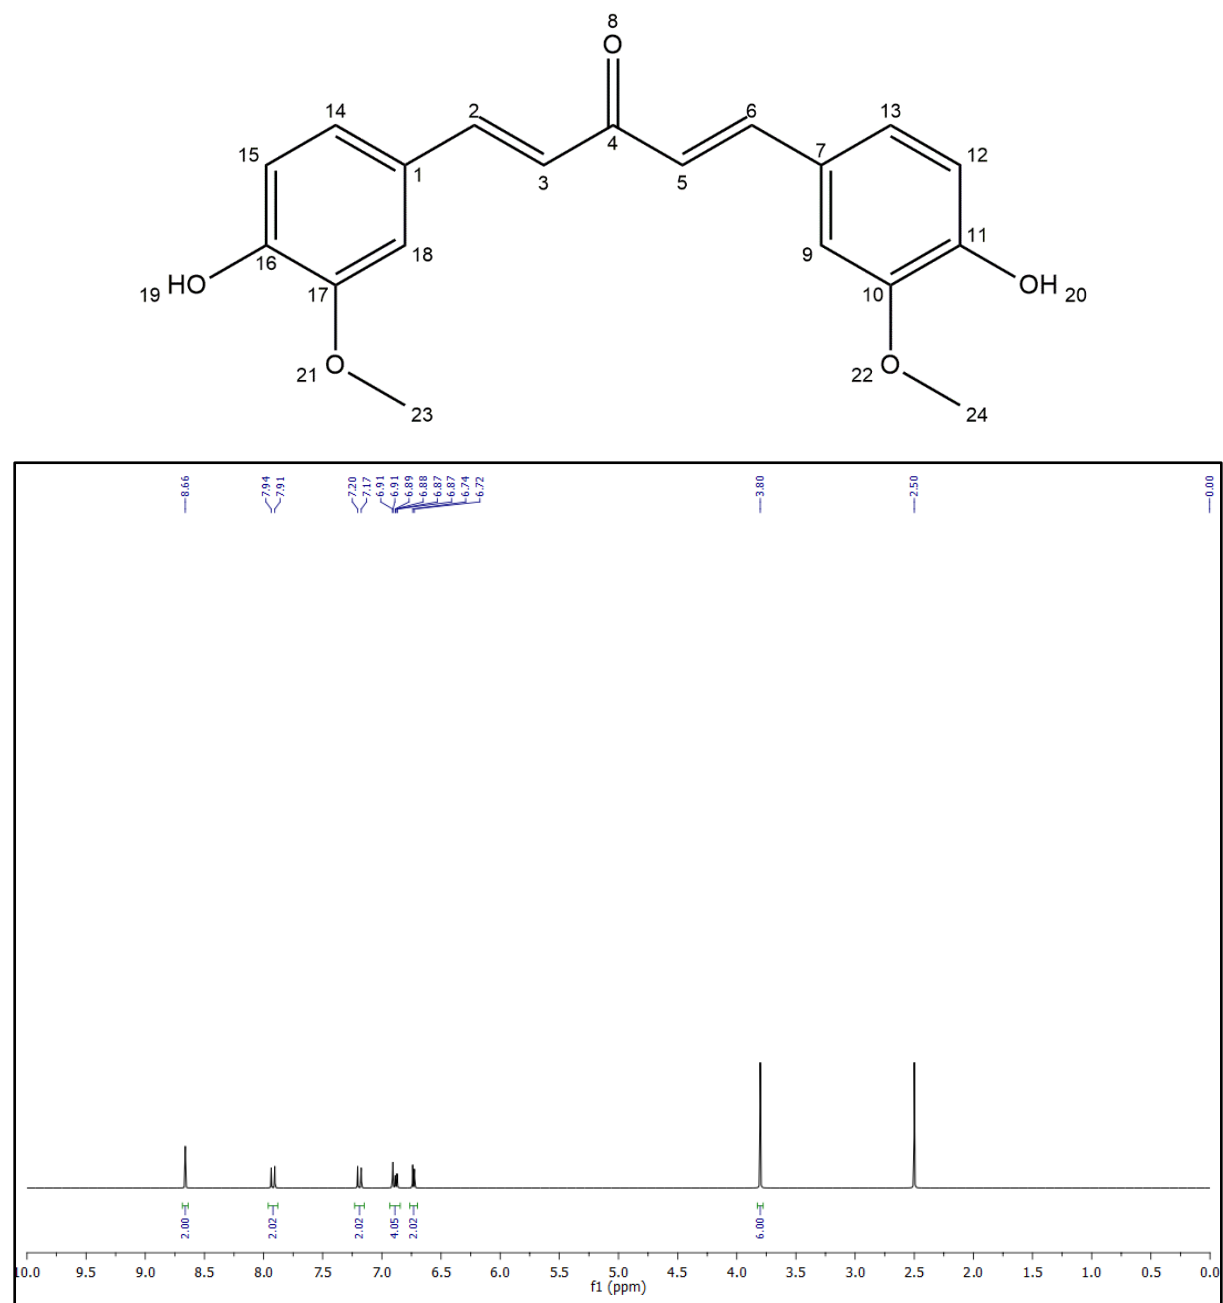

**Figure S36.**  $^{13}\text{C}$  NMR of 1,5-bis(4-hydroxy-3-methoxyphenyl)penta-1,4-dien-3-one (1d)

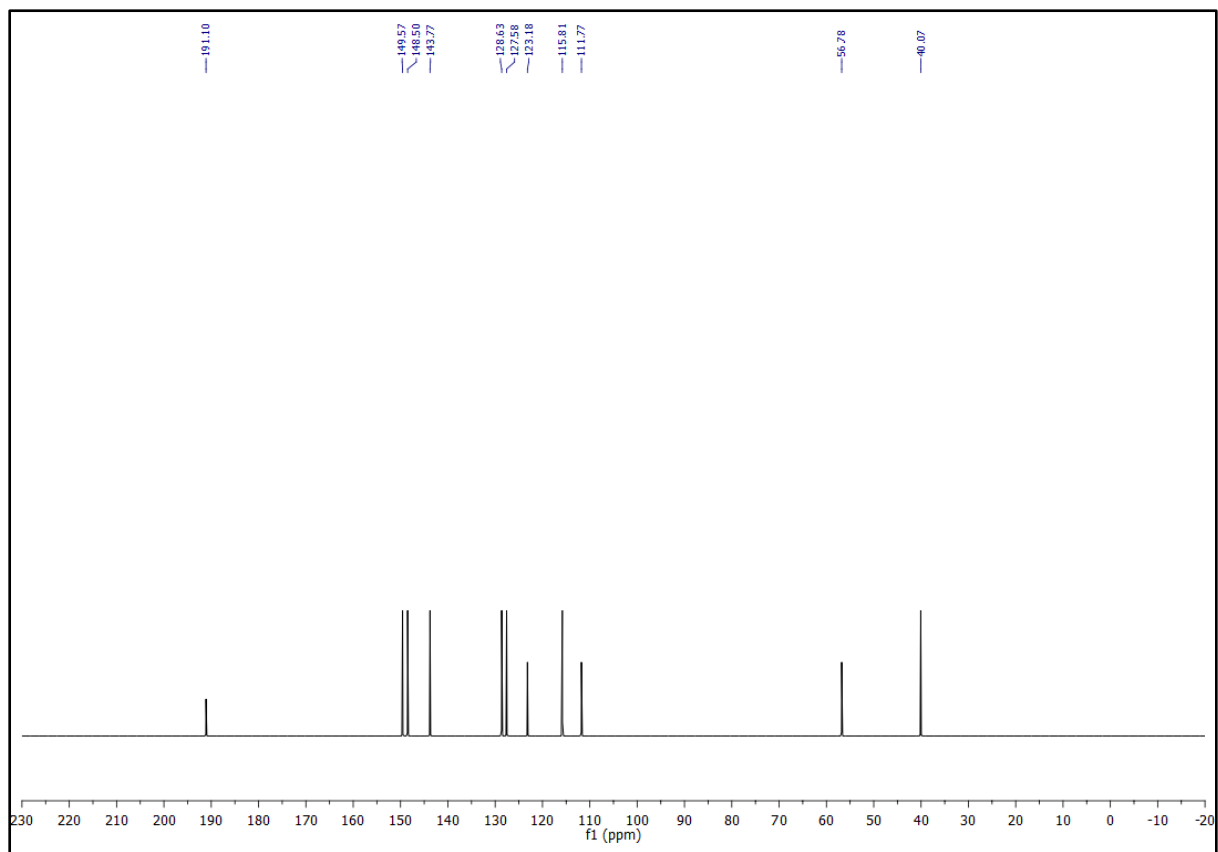

Figure S37. <sup>1</sup>H NMR of 1,5-bis(2-hydroxyphenyl)penta-1,4-dien-3-one (1e)

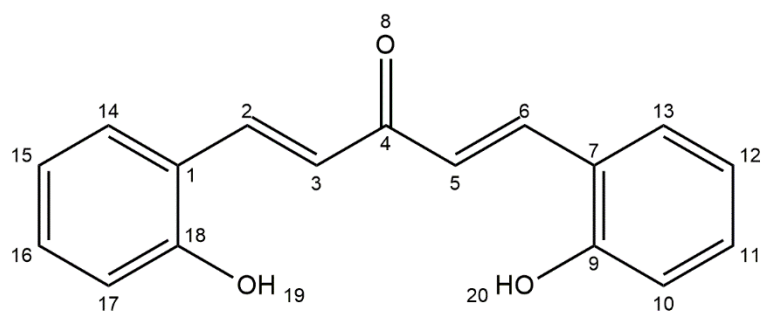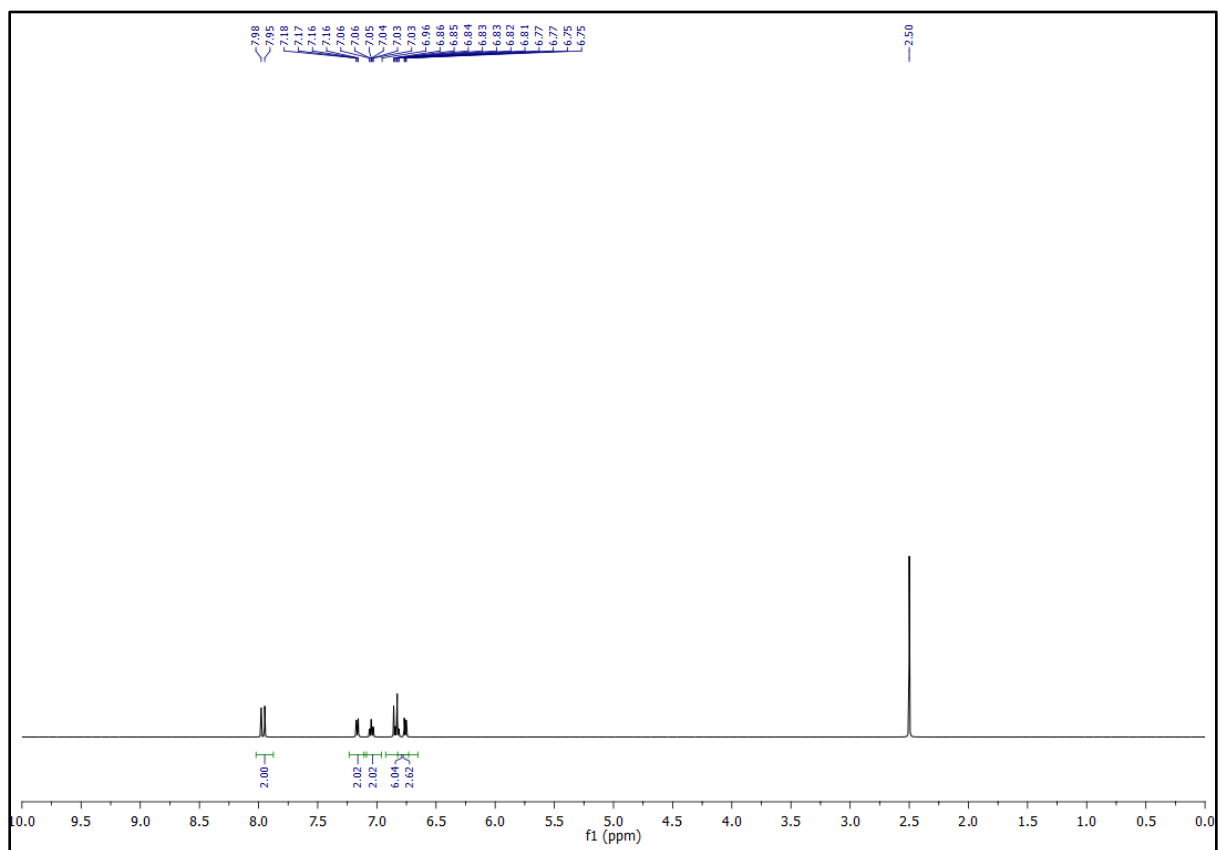

**Figure S38.**  $^{13}\text{C}$  NMR of 1,5-bis(2-hydroxyphenyl)penta-1,4-dien-3-one (1e)

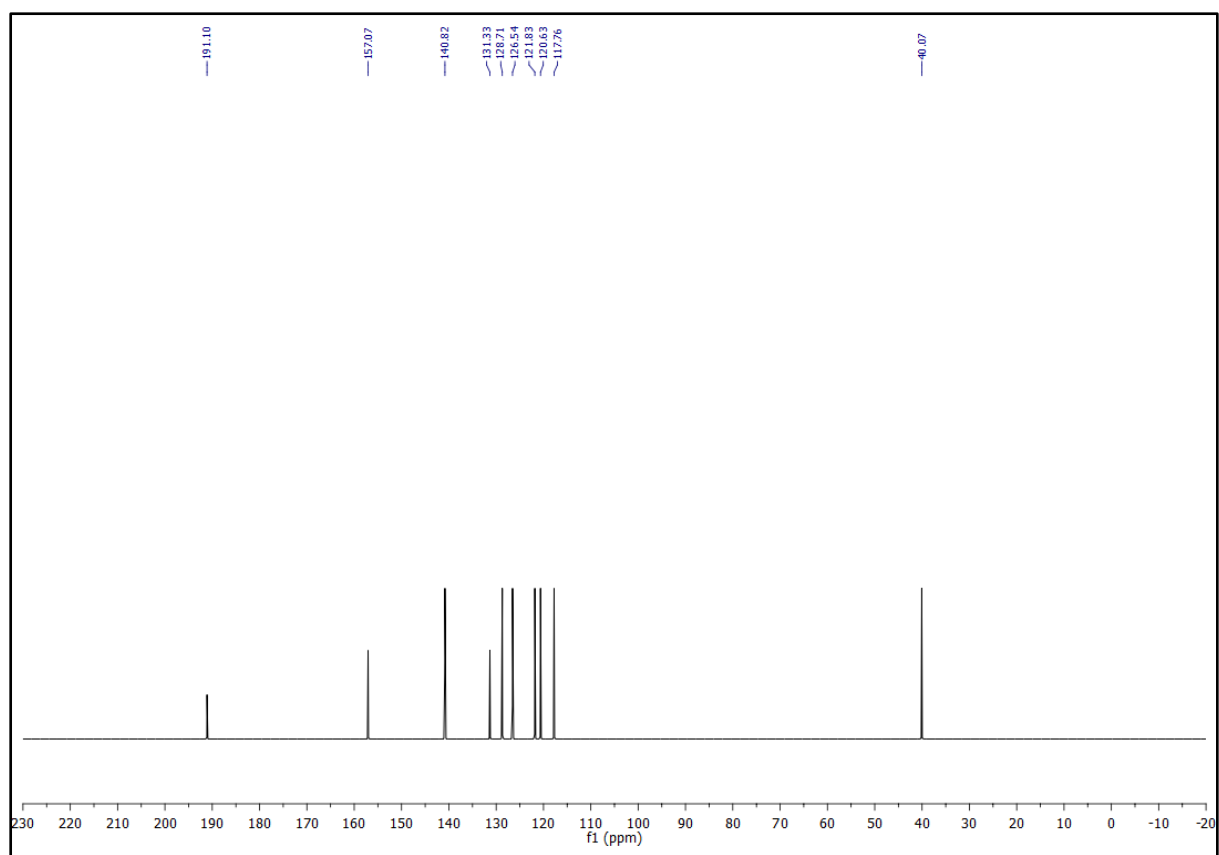

**Figure S39.**  $^1\text{H}$  NMR of 1,5-bis(4-(dimethylamino)phenyl)penta-1,4-dien-3-one (1f)

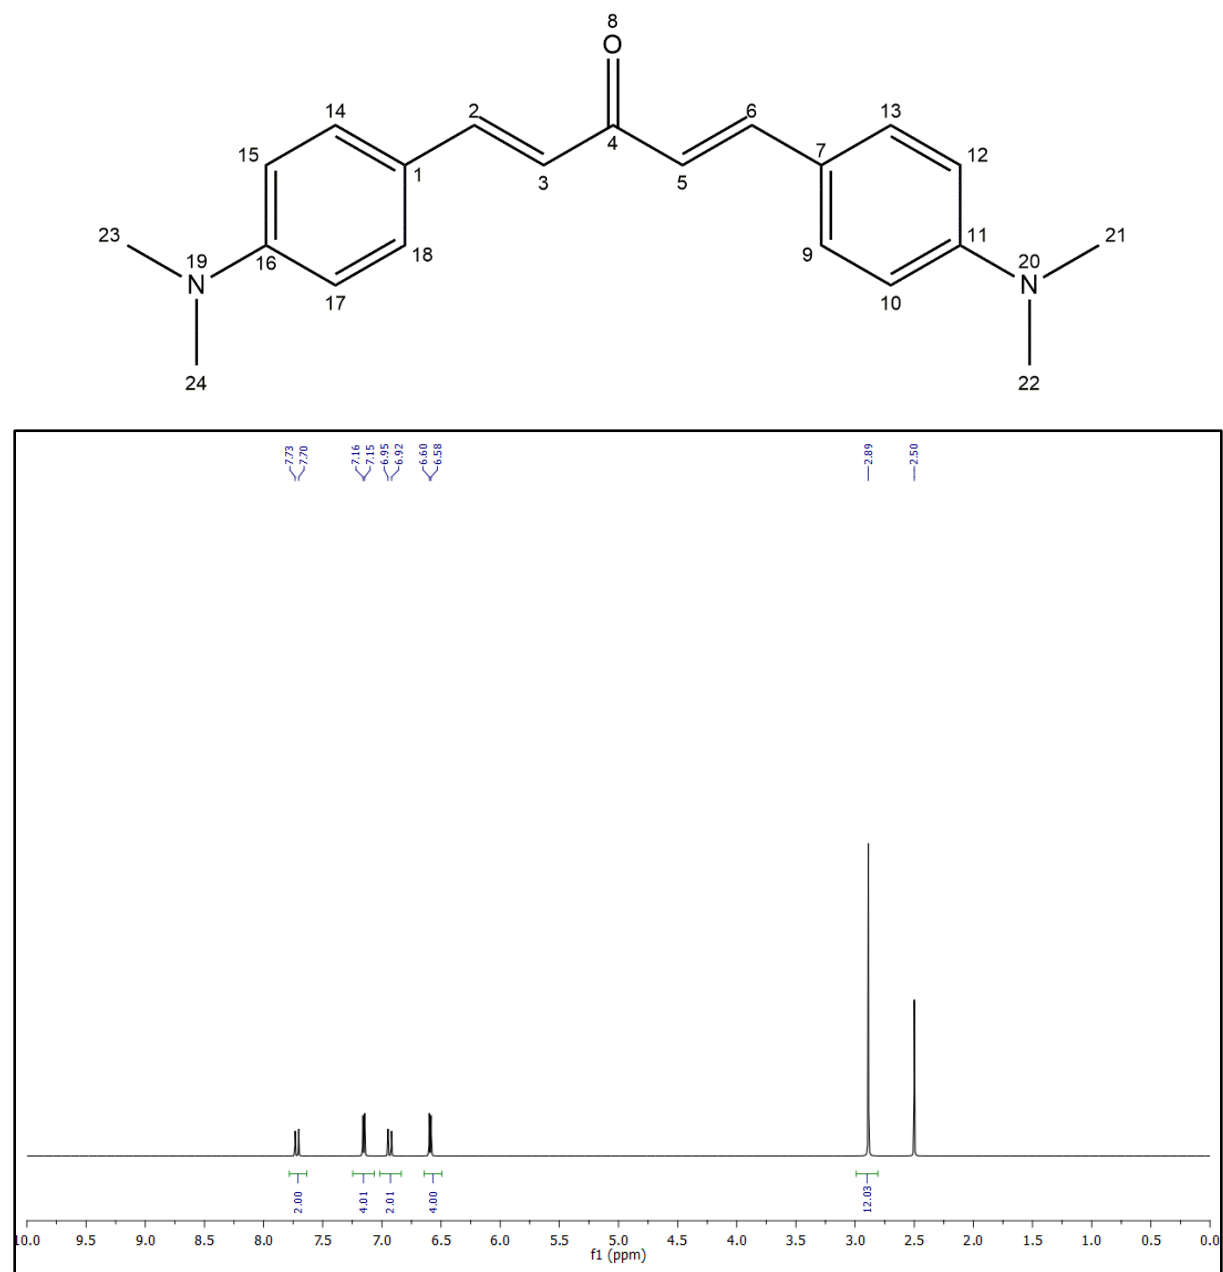

**Figure S40.**  $^{13}\text{C}$  NMR of 1,5-bis(4-(dimethylamino)phenyl)penta-1,4-dien-3-one (1f)

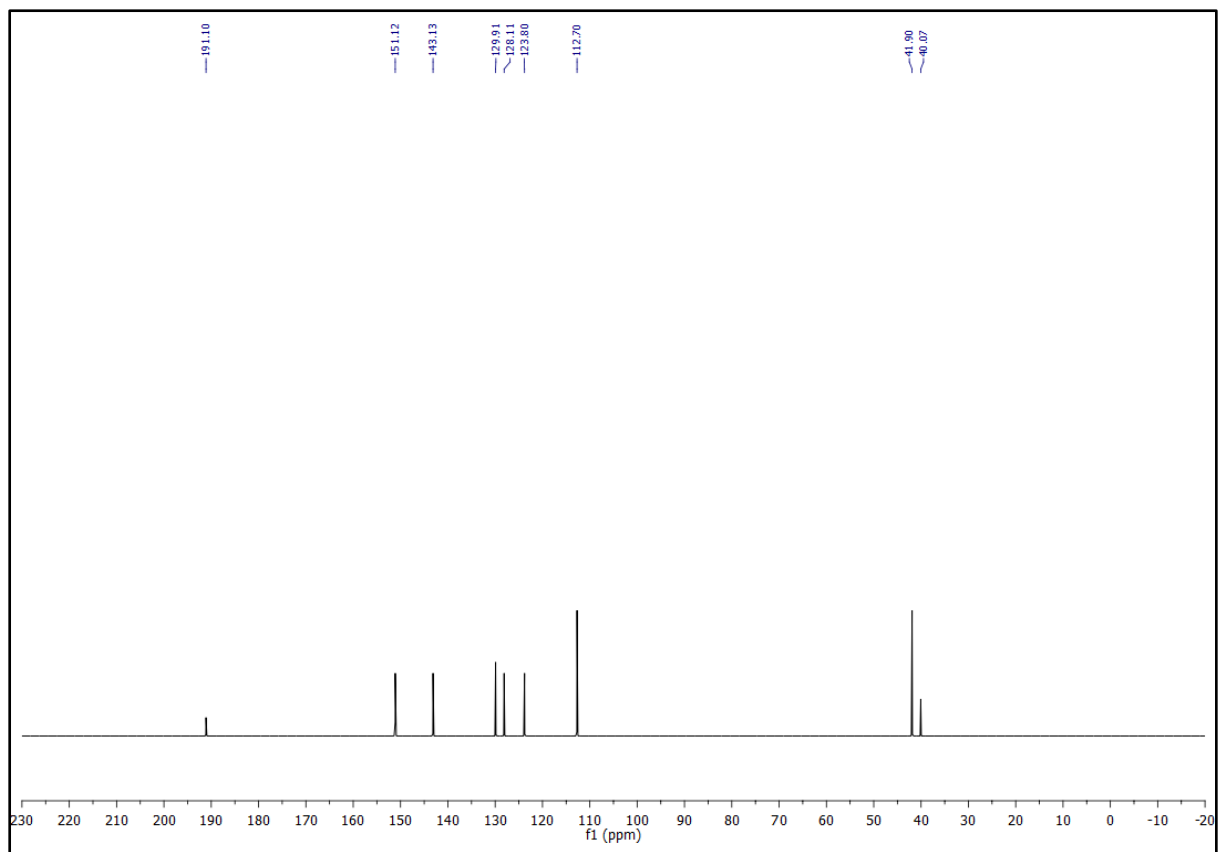

**Figure S41.**  $^1\text{H}$  NMR of 1,5-bis(4-chlorophenyl)penta-1,4-dien-3-one (1g)

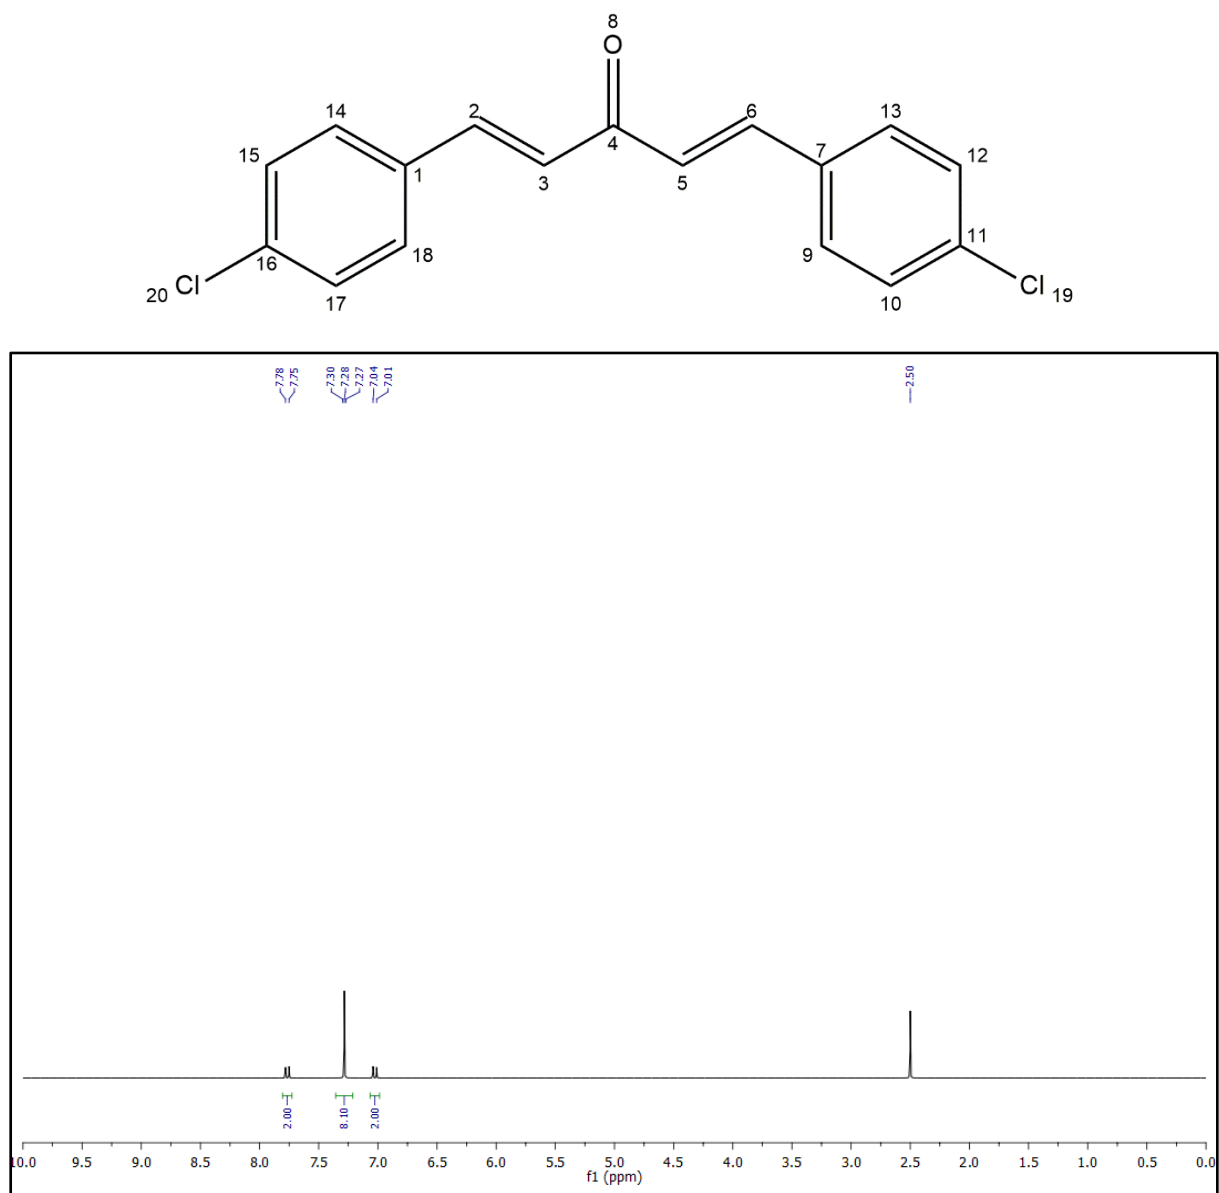

**Figure S42.**  $^{13}\text{C}$  NMR of 1,5-bis(4-chlorophenyl)penta-1,4-dien-3-one (1g)

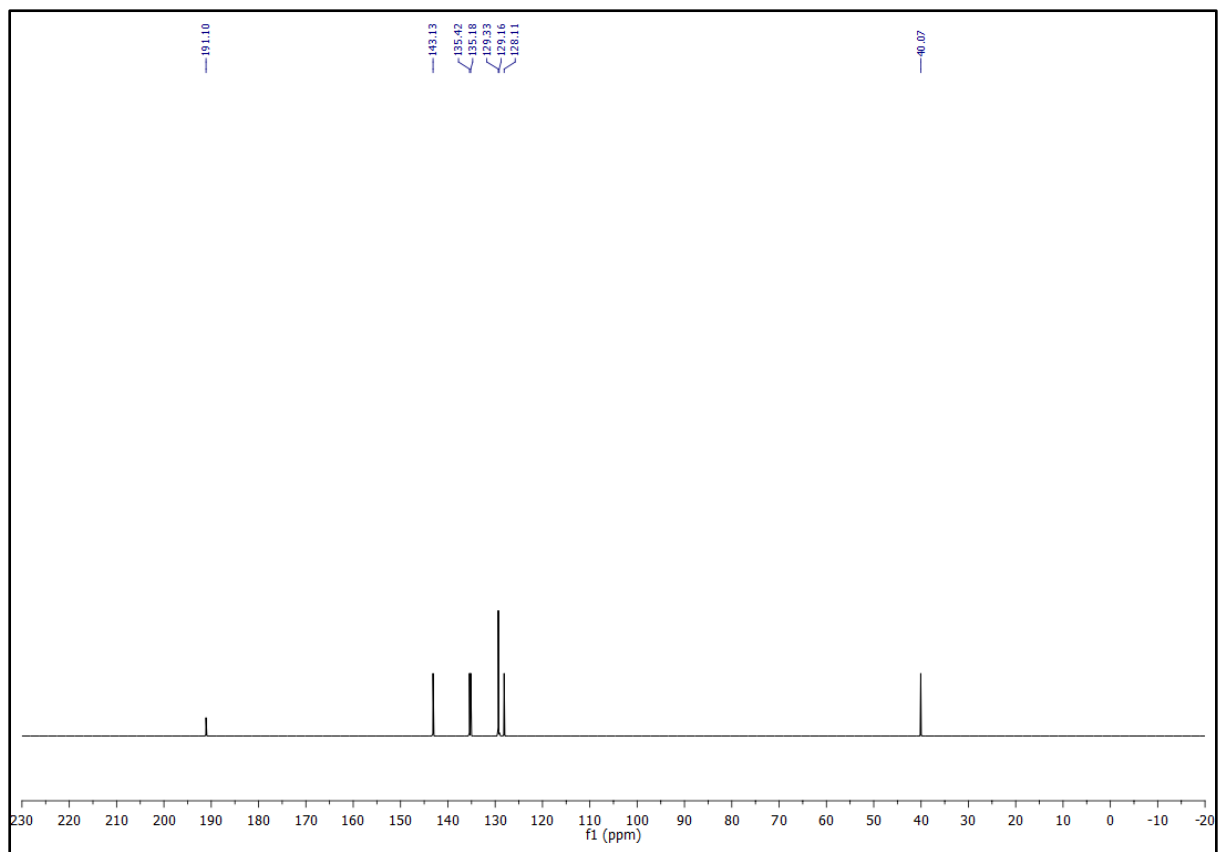

**Figure S43.**  $^1\text{H}$  NMR of 4-(1-(3,5-dinitrophenyl)-3-(4-hydroxystyryl)-4,5-dihydro-1H-pyrazol-5-yl)phenol (IIIab)

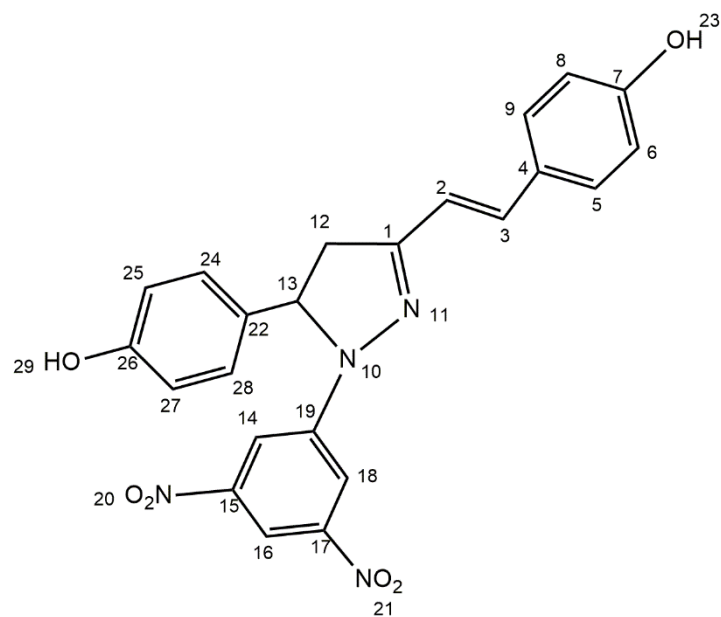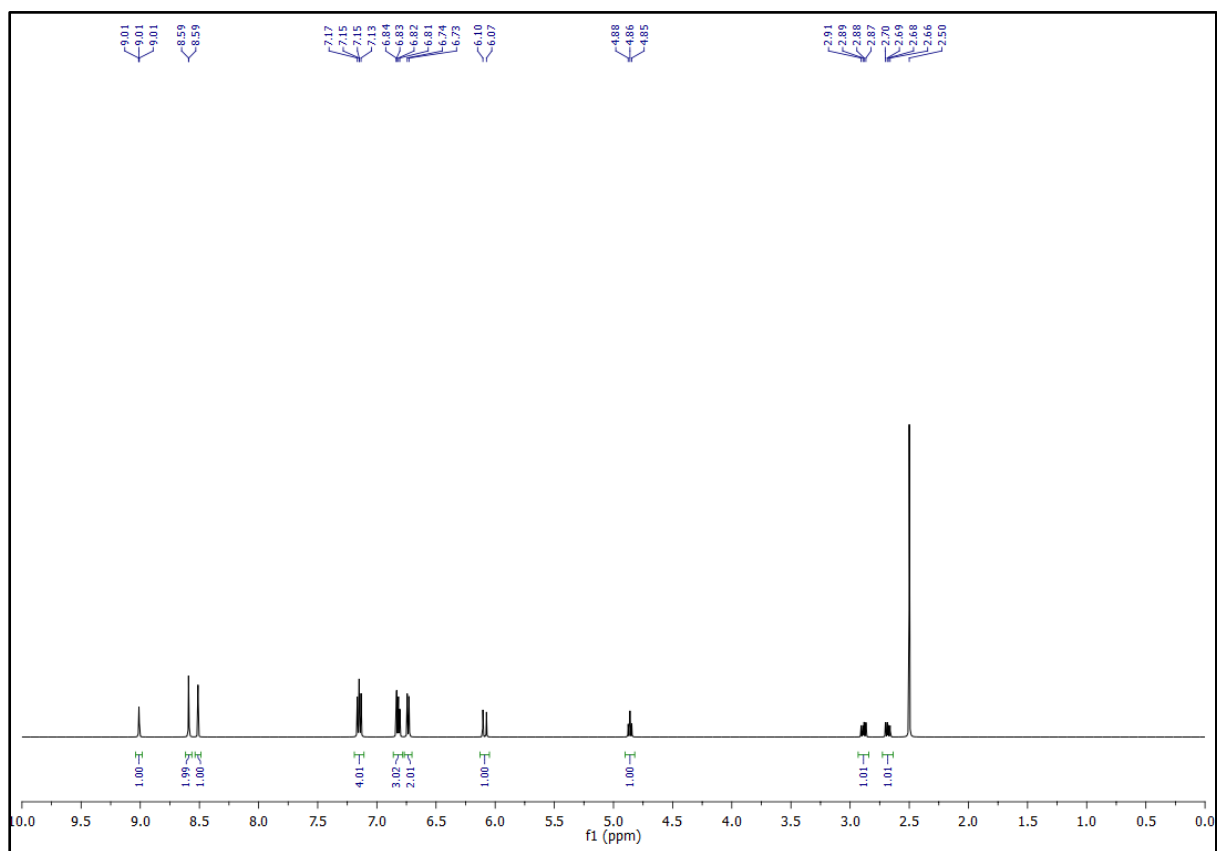

**Figure S44.**  $^{13}\text{C}$  NMR of 4-(1-(3,5-dinitrophenyl)-3-(4-hydroxystyryl)-4,5-dihydro-1H-pyrazol-5-yl)phenol (IIIab)

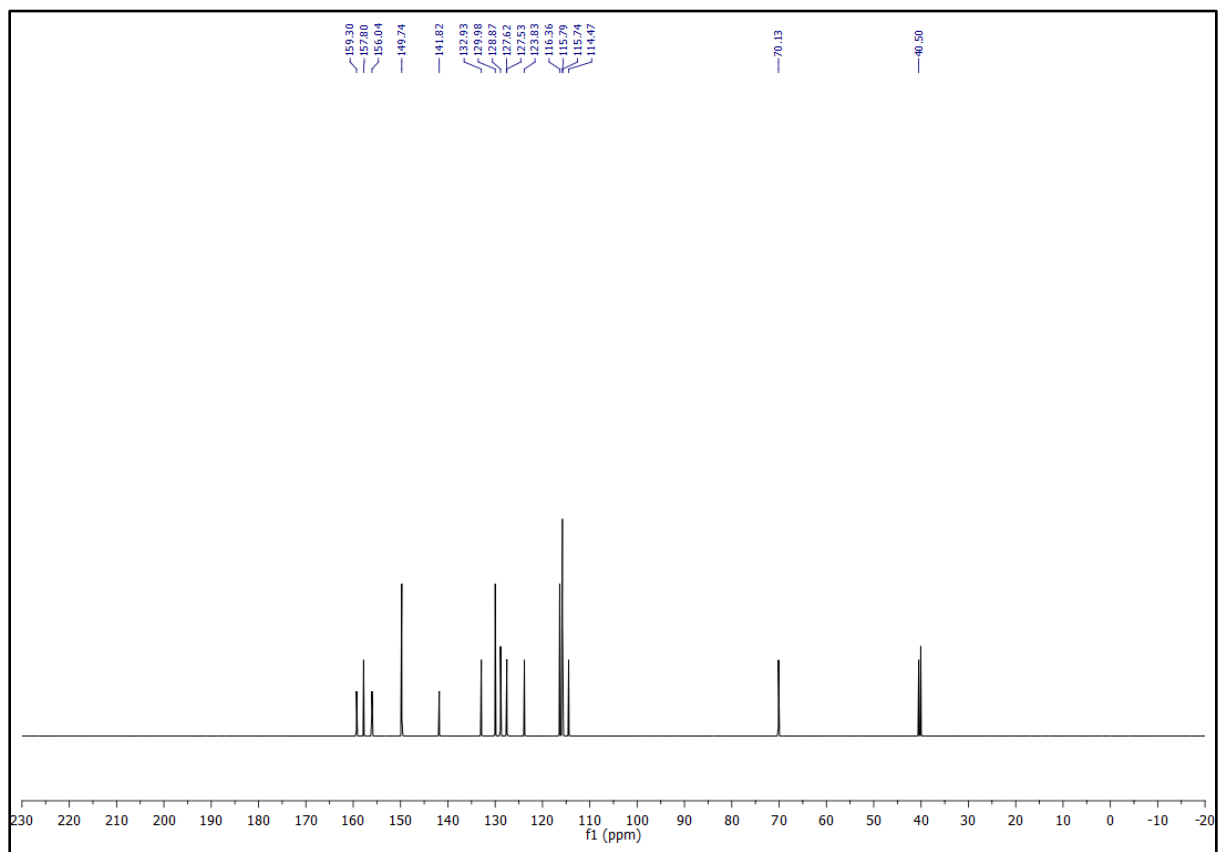

**Figure S45.**  $^1\text{H}$  NMR of 4,4'-(3-(2-(2,4-dinitrophenyl)hydrazono)penta-1,4-diene-1,5-diyl)diphenol (IIab)

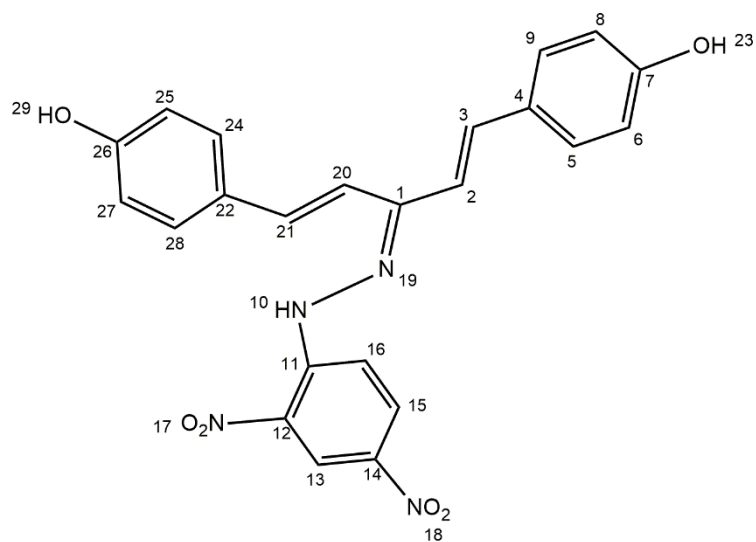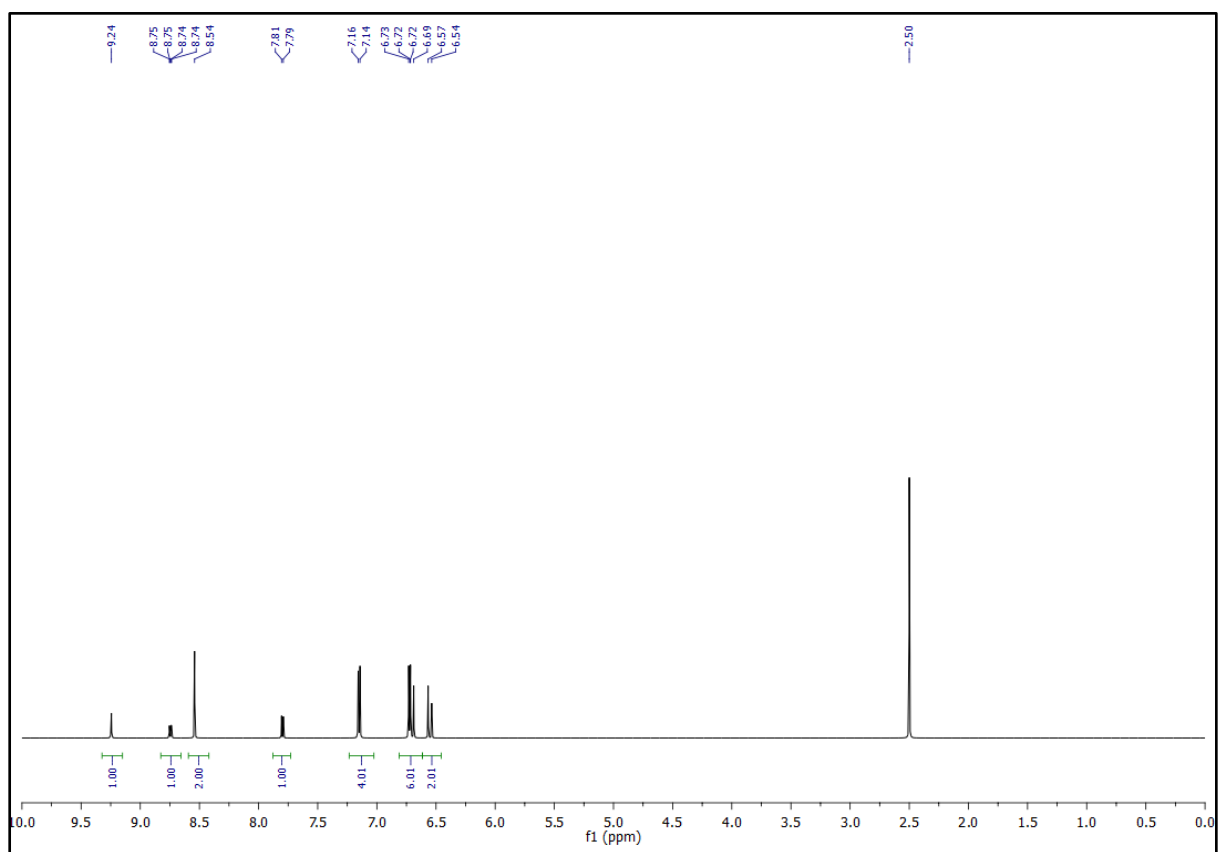

**Figure S46.**  $^{13}\text{C}$  NMR of 4,4'-(3-(2-(2,4-dinitrophenyl)hydrazono)penta-1,4-diene-1,5-diyl)diphenol (*IIab*)

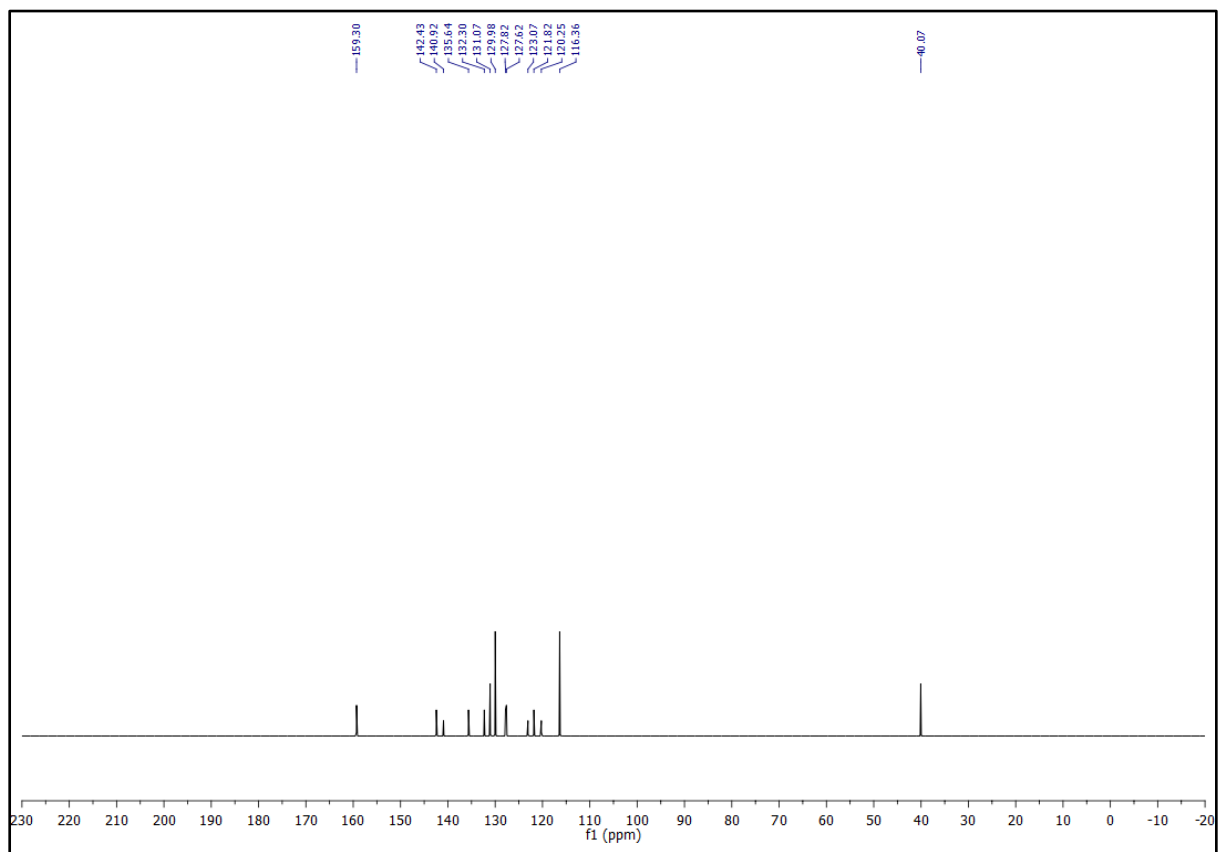

**Figure S47.** 2D (left) and 3D (right) representations of closest binding interaction between synthesized ligands (4a-4n) and receptor protein 2QV4.

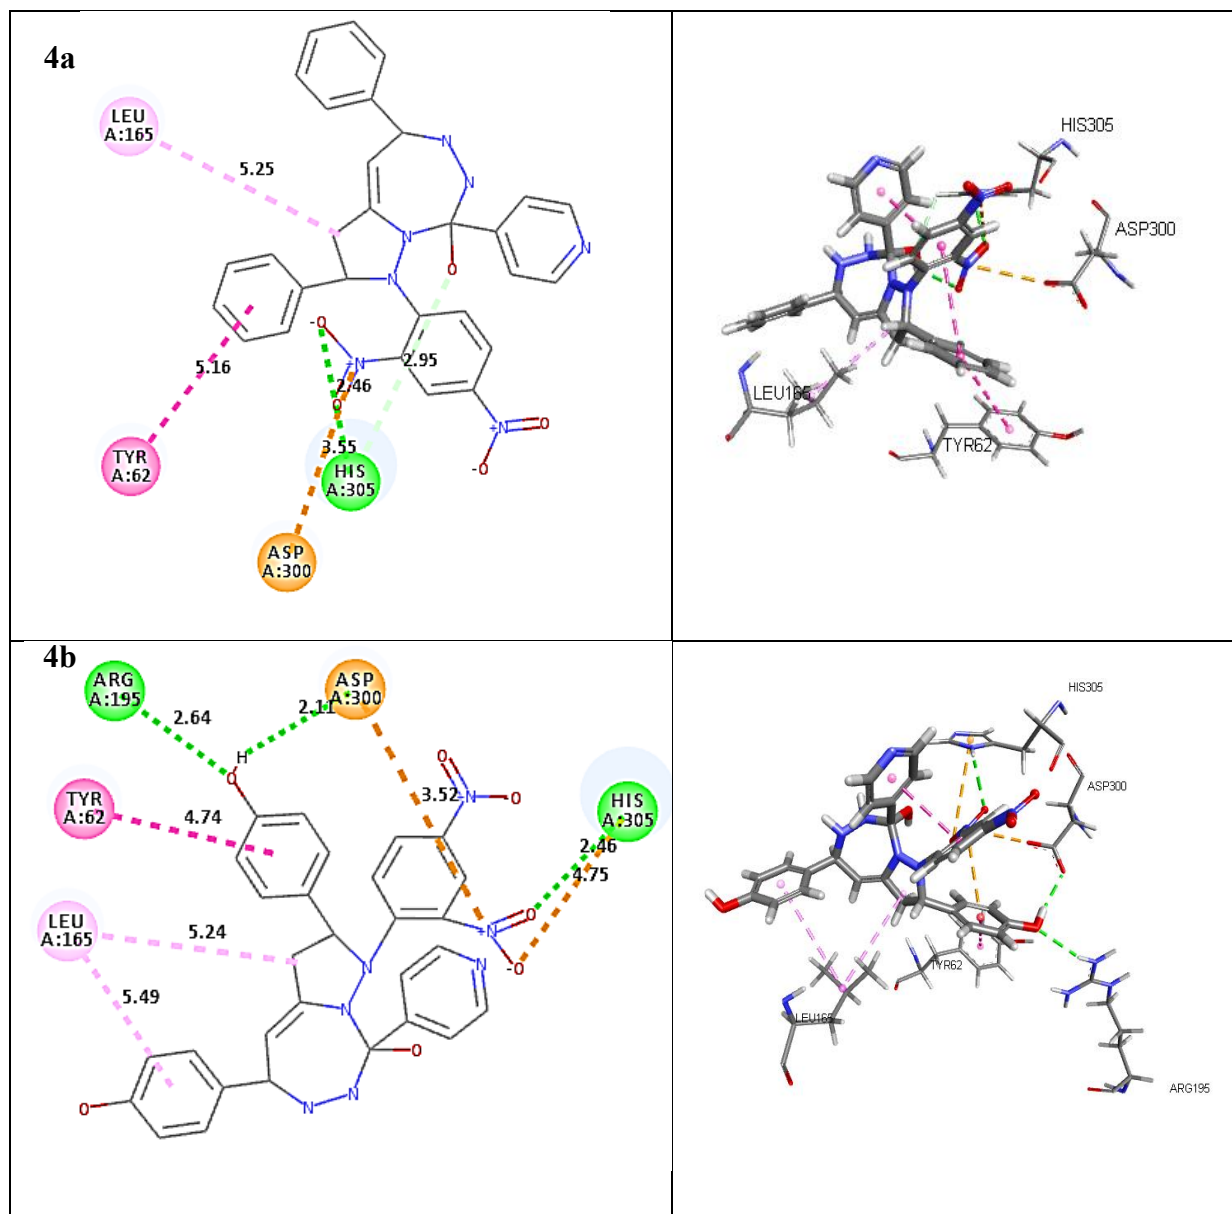

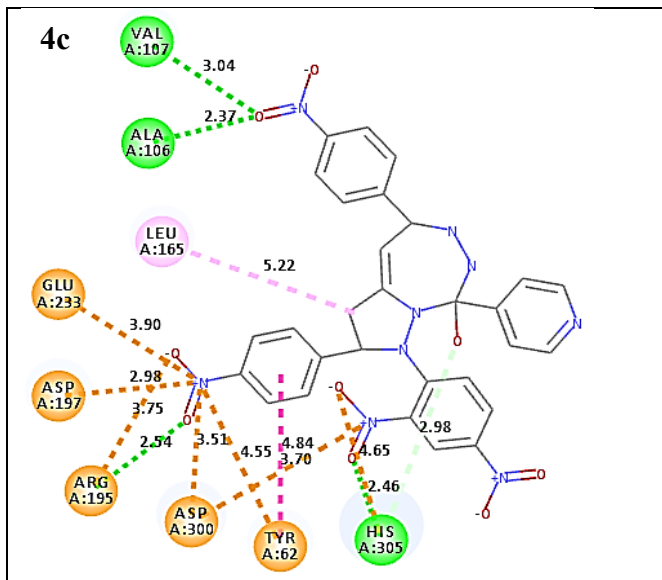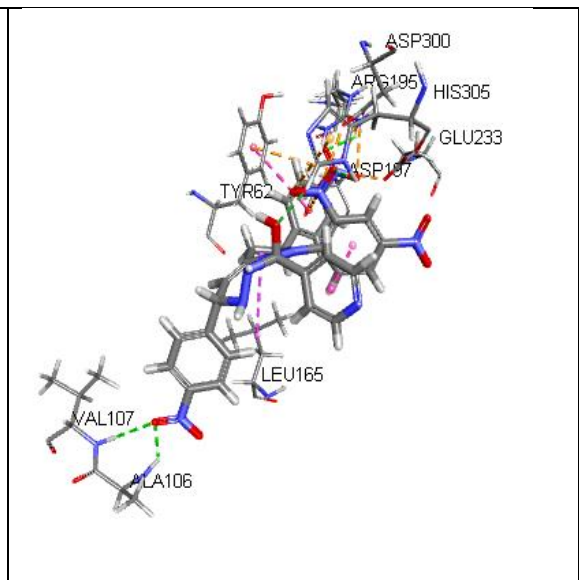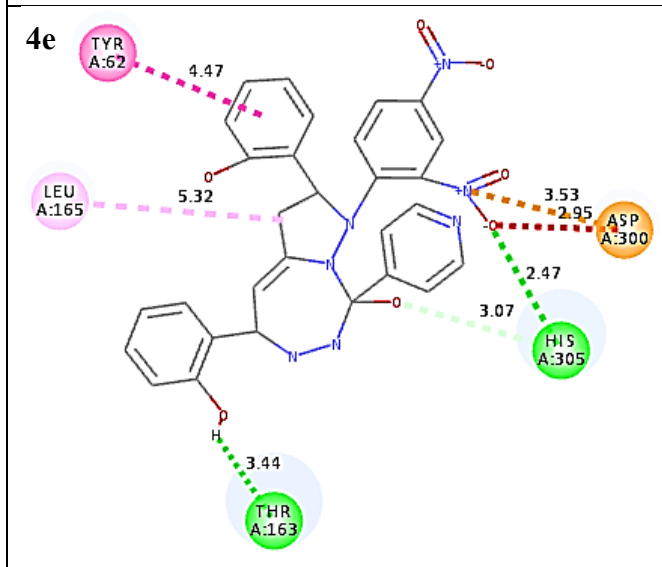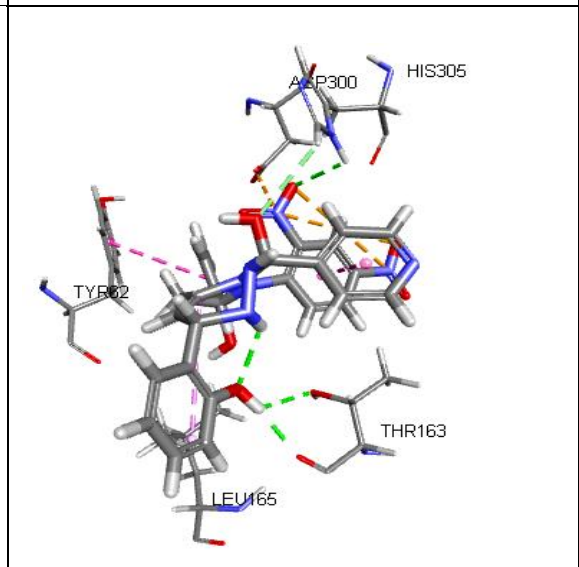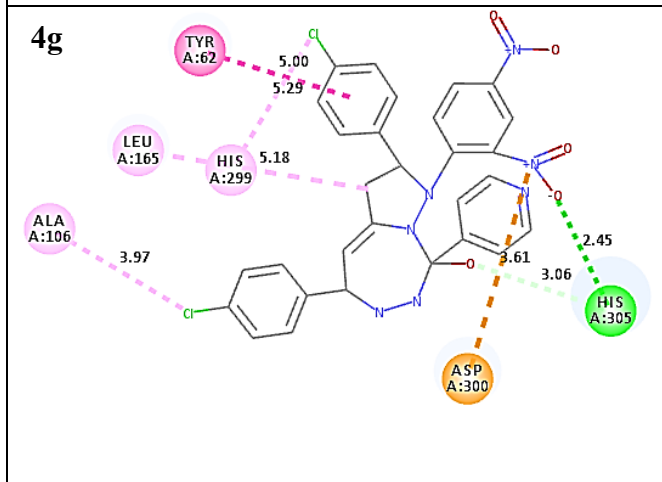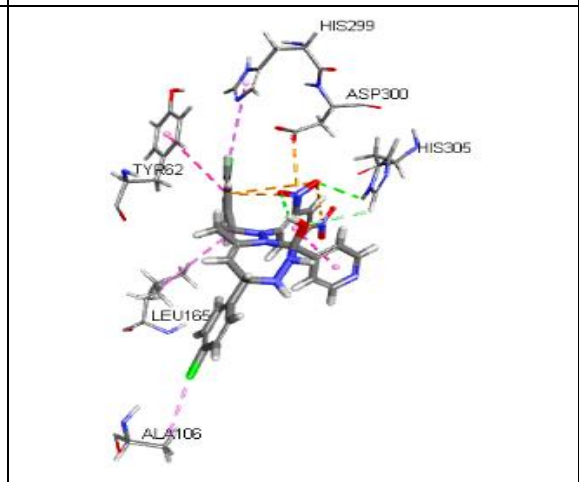

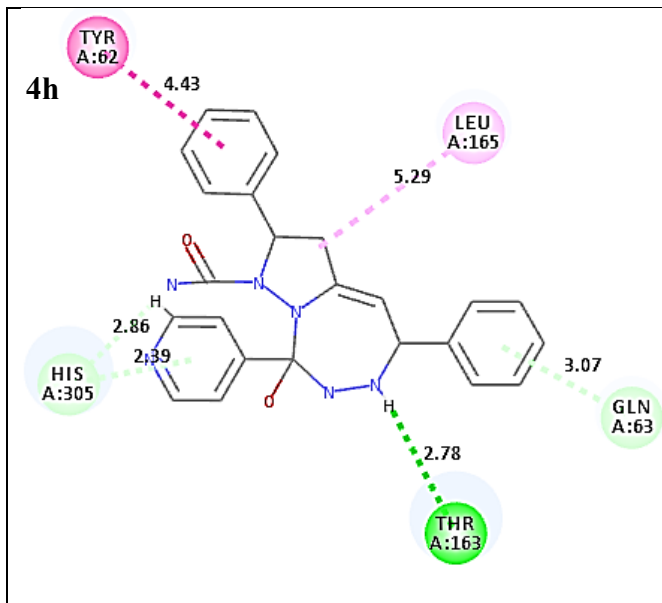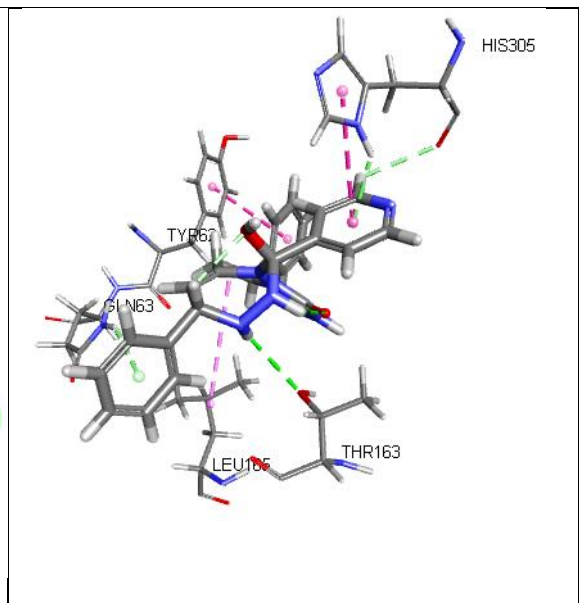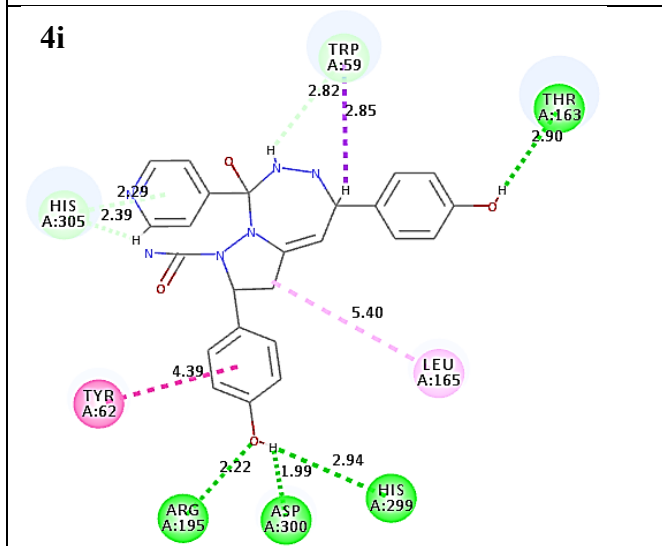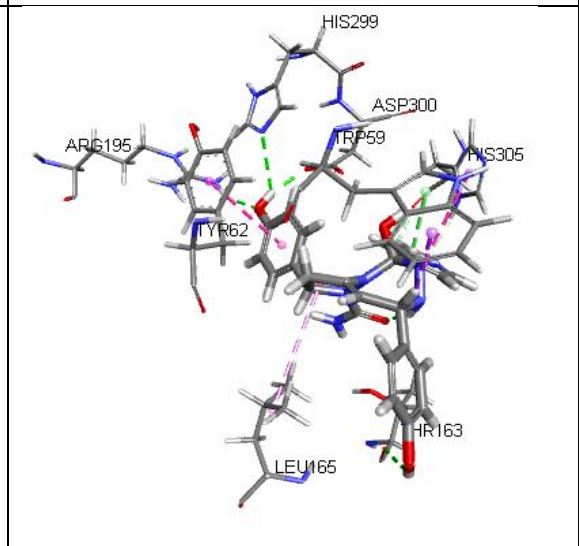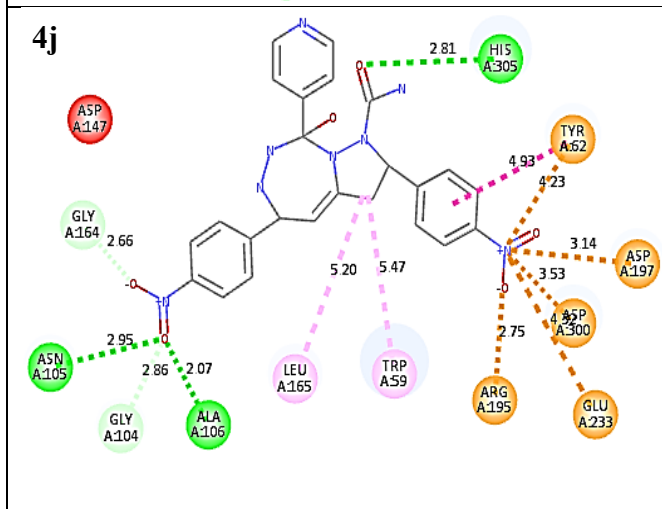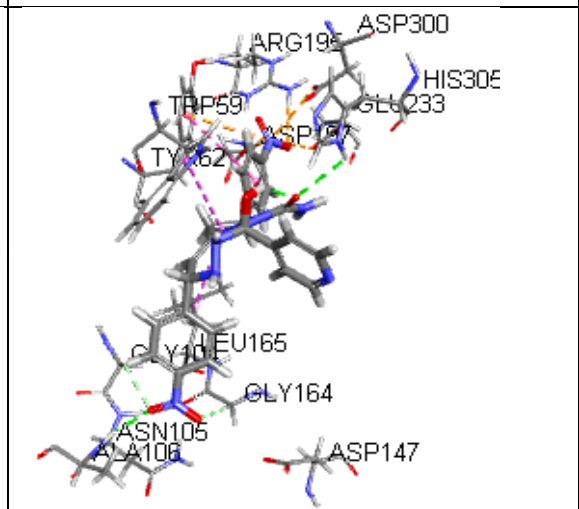

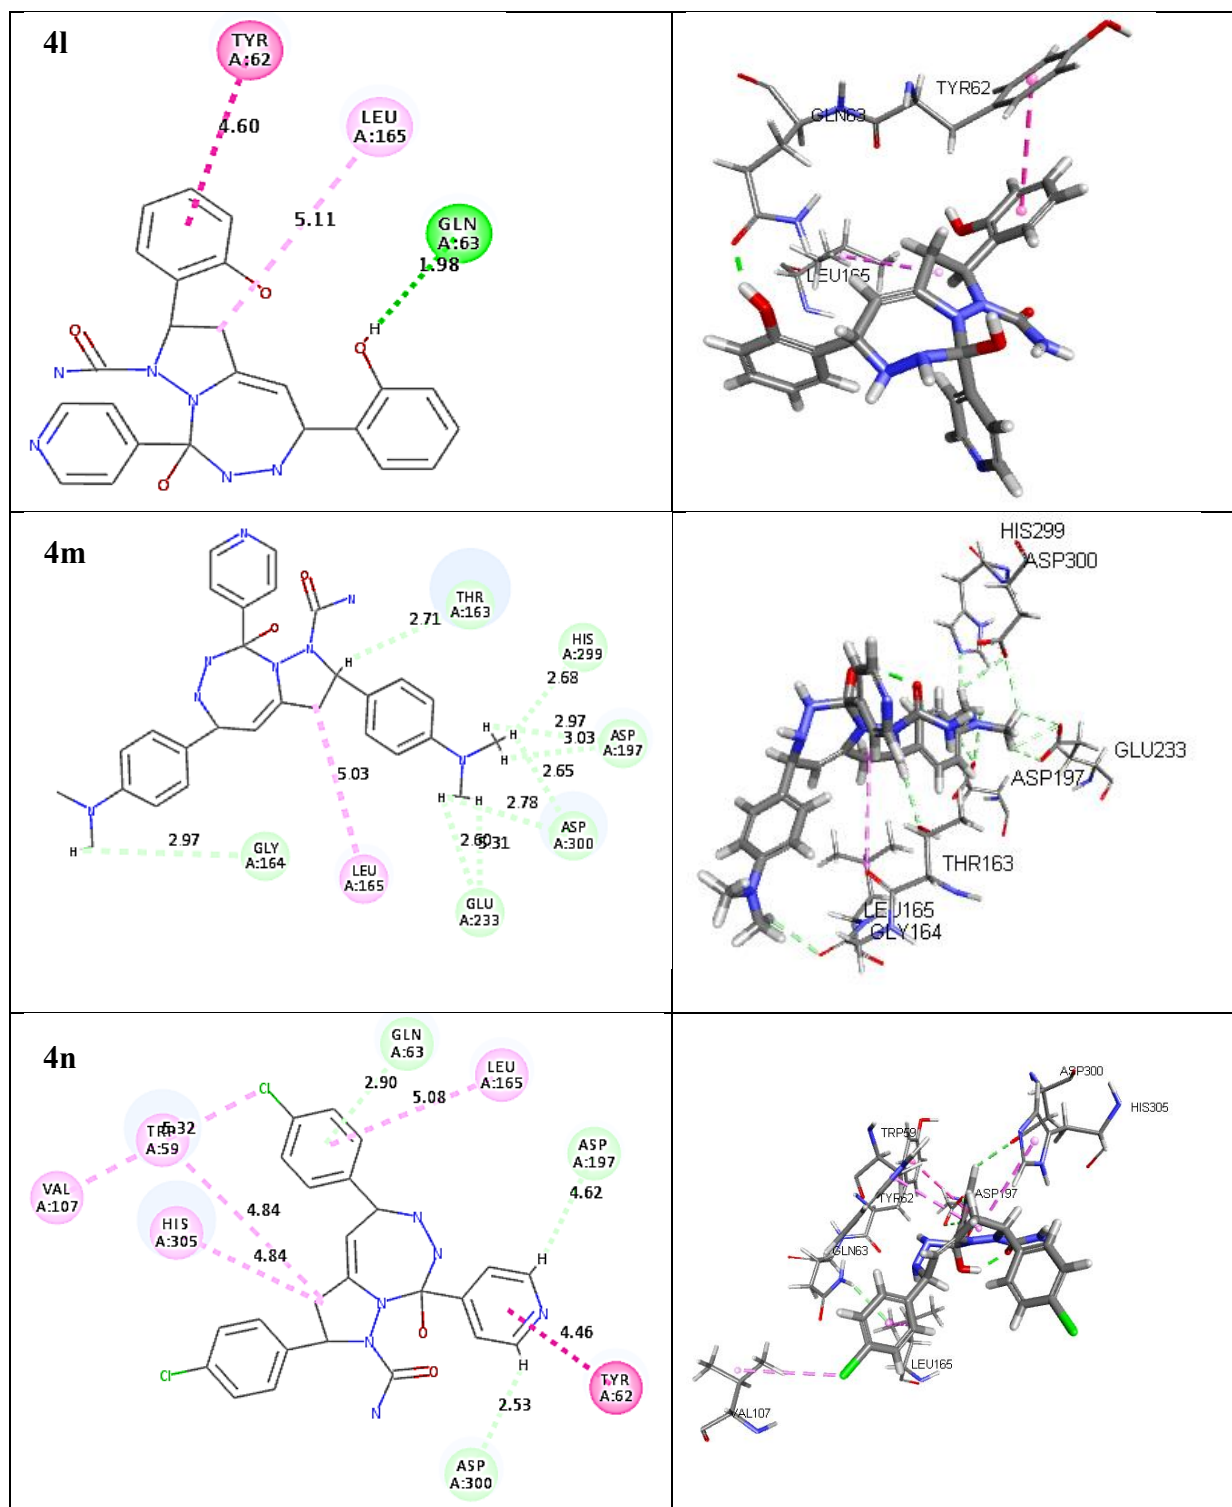

**Figure S48.** 2D (left) and 3D (right) representations of closest binding interaction between synthesized ligands (4a-4n) and receptor protein 3W37.

**4a**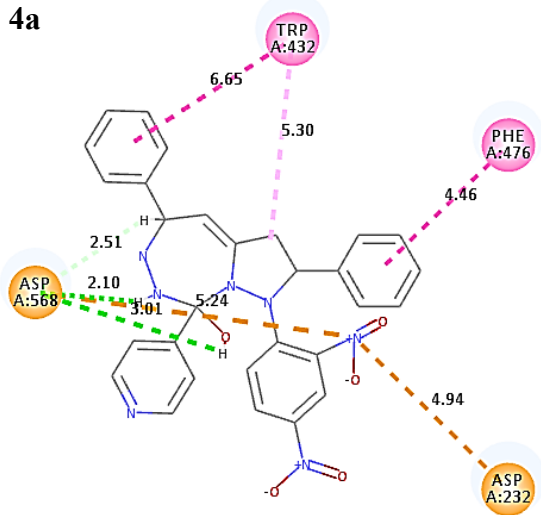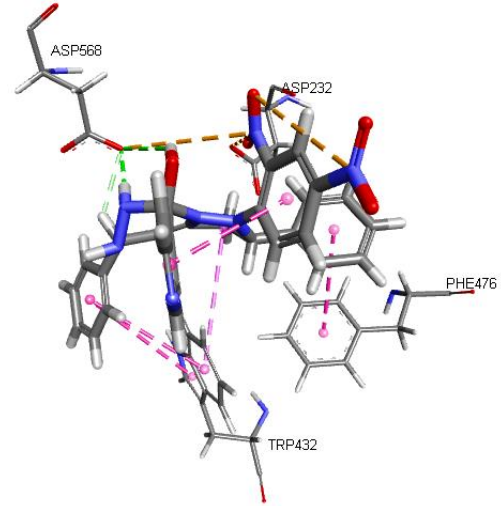**4b**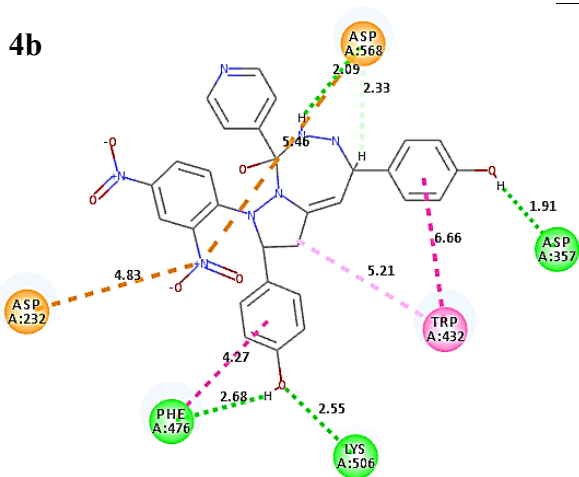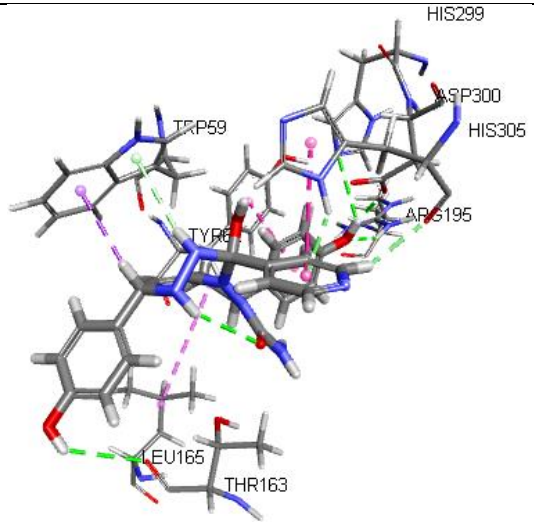**4c**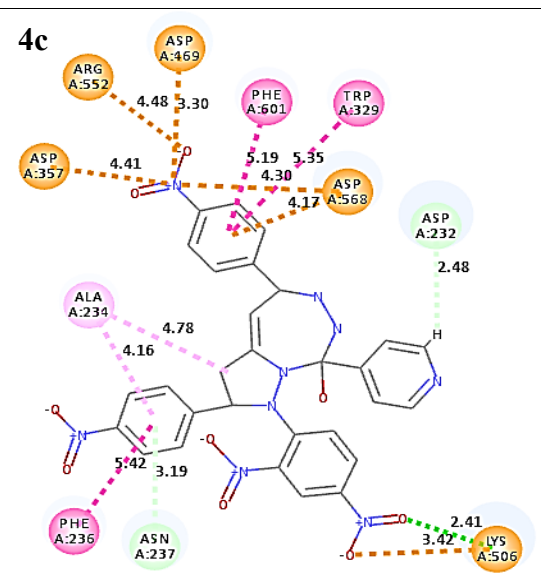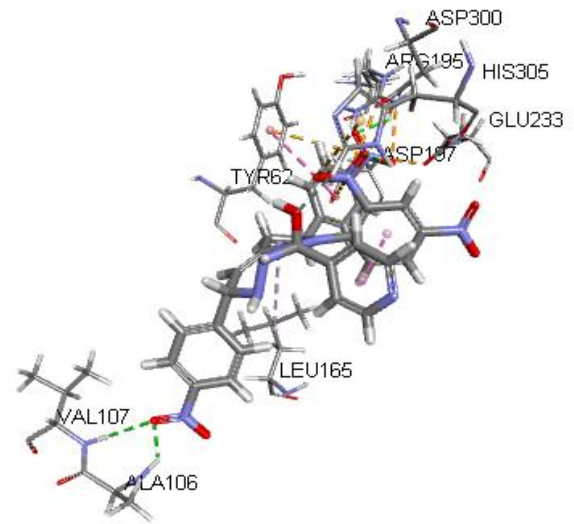

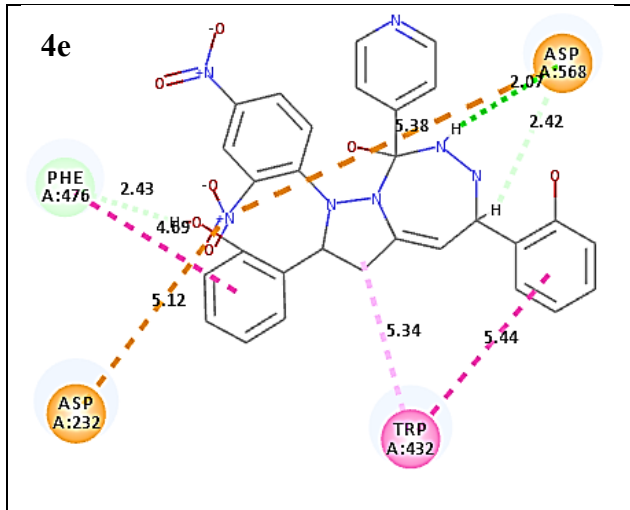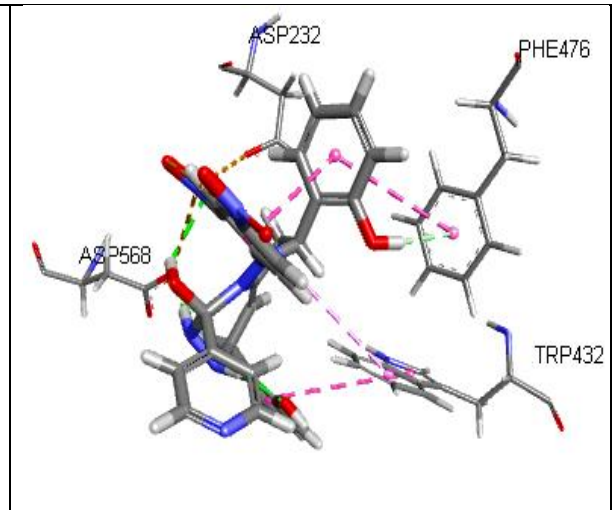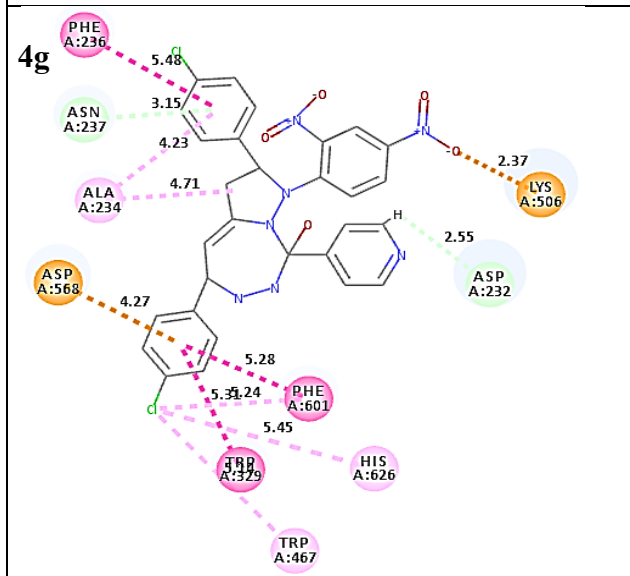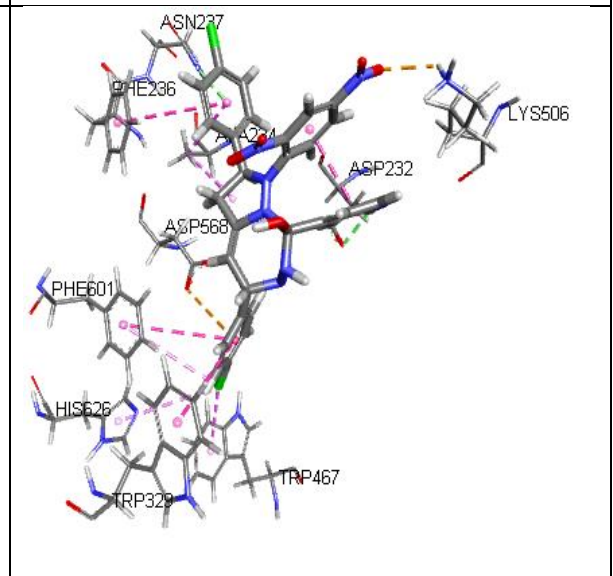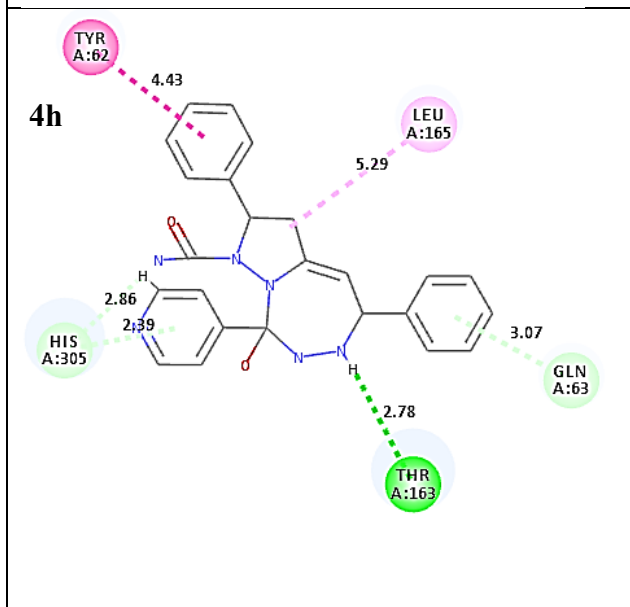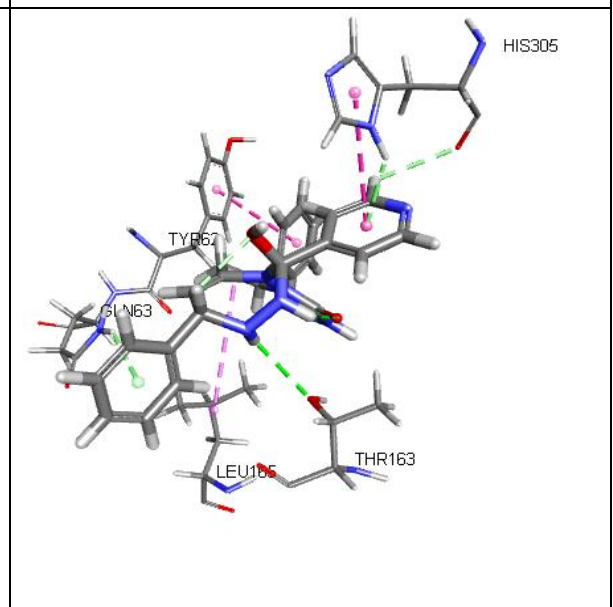

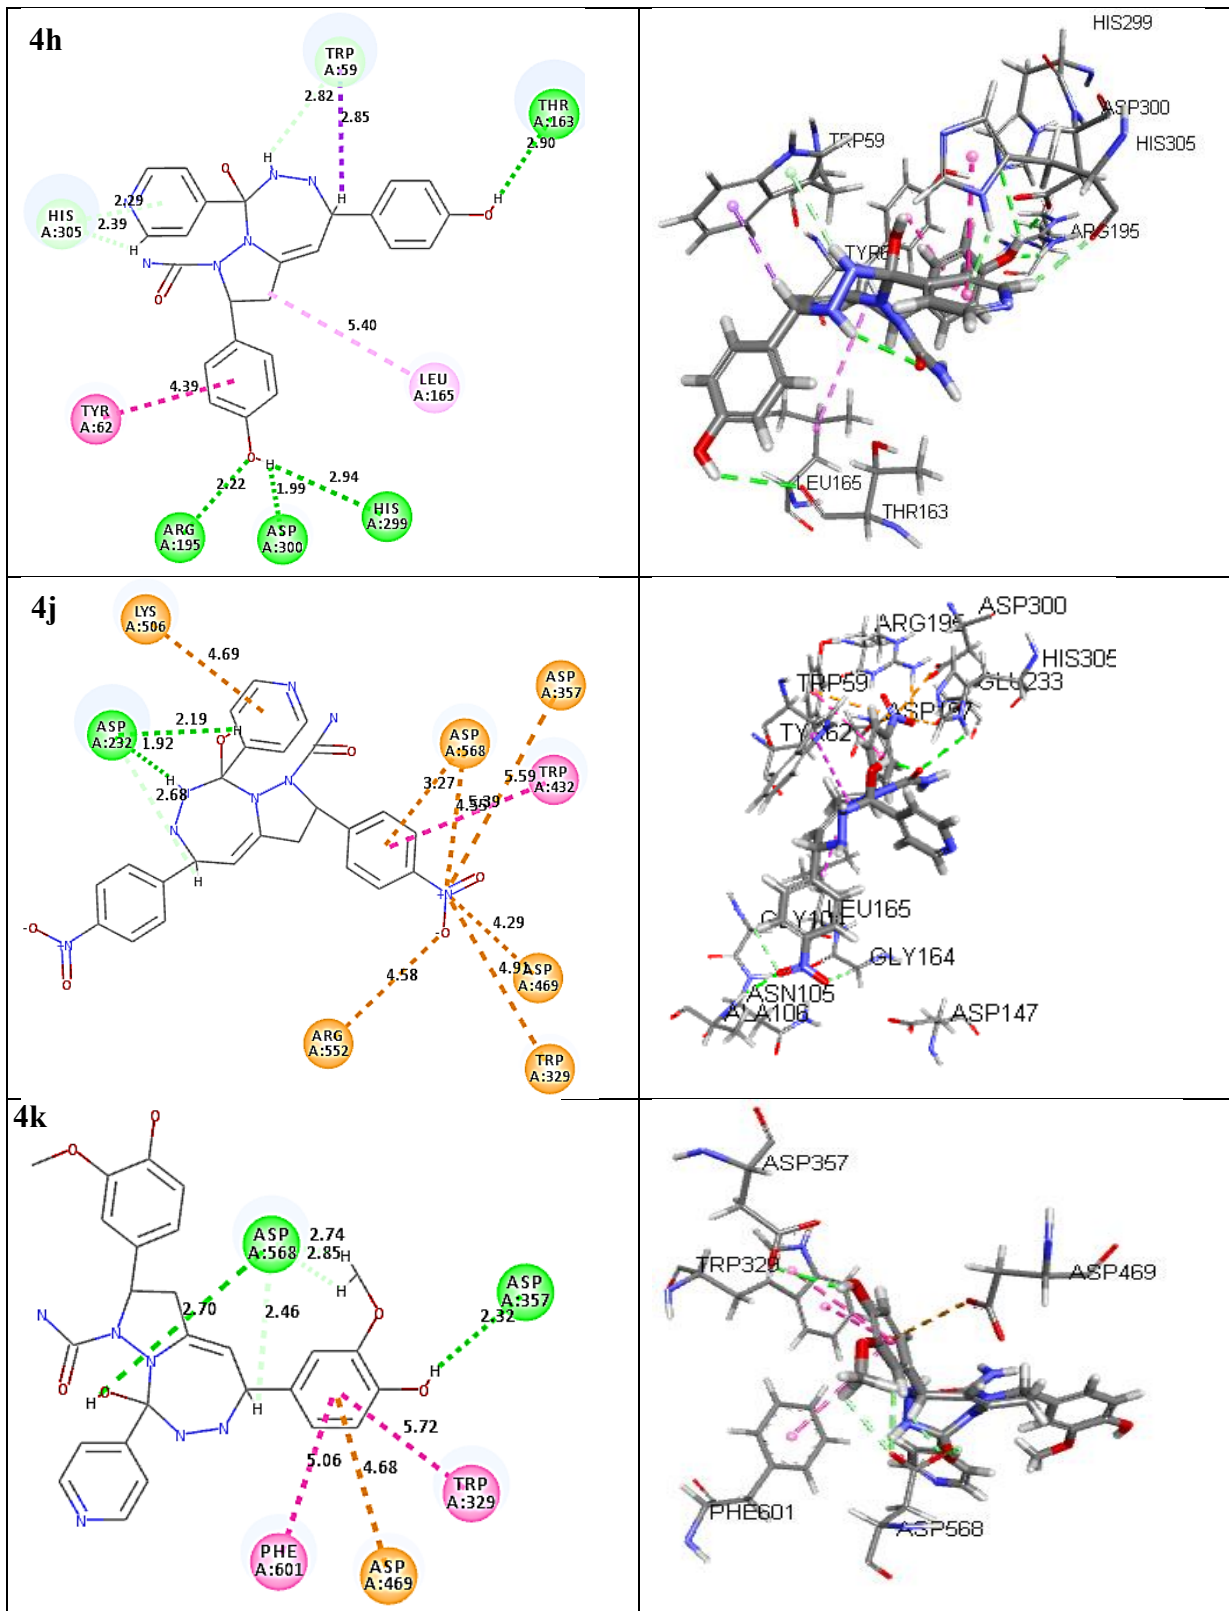

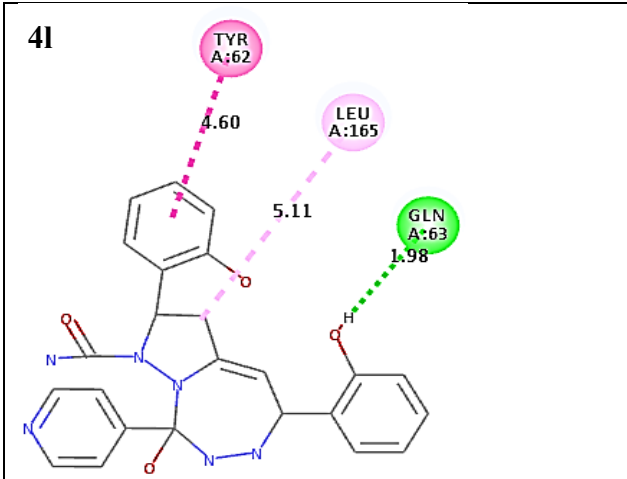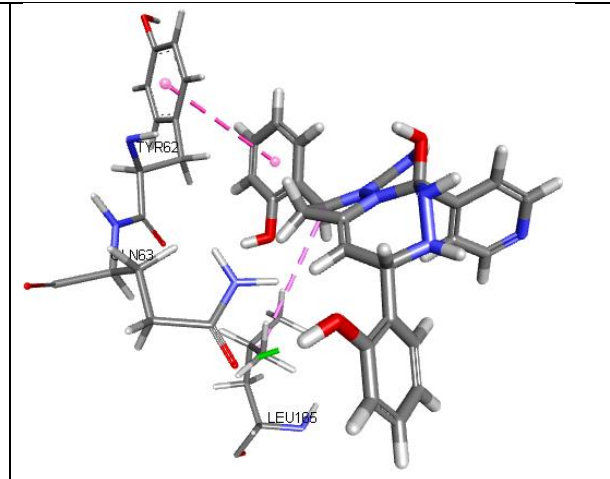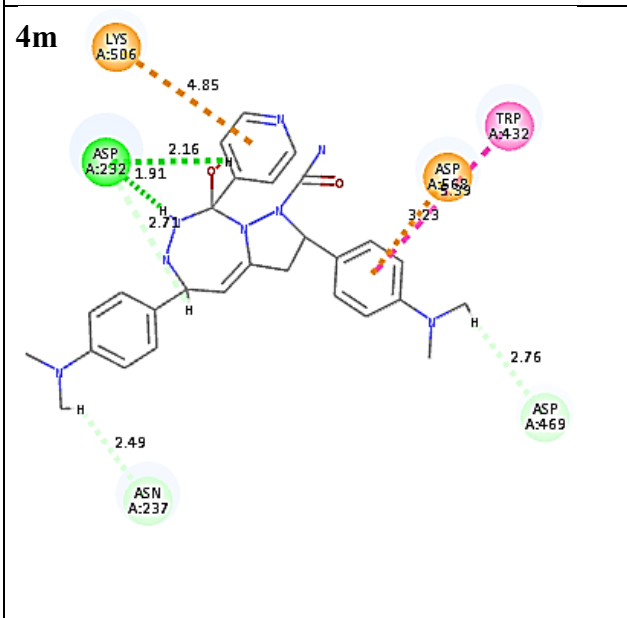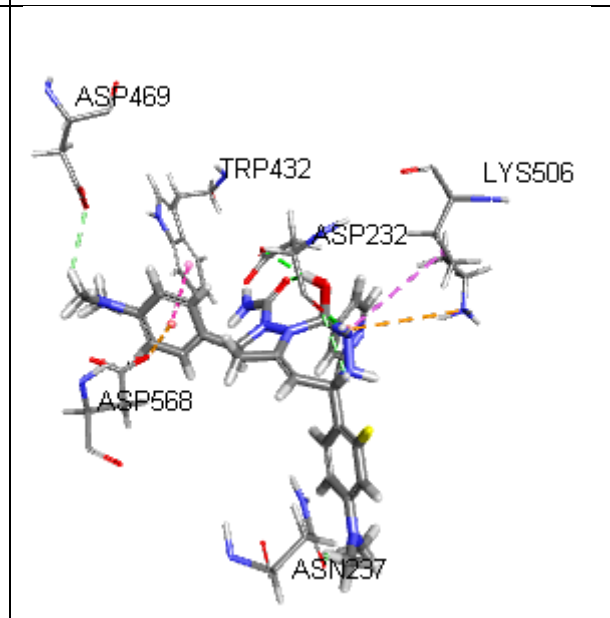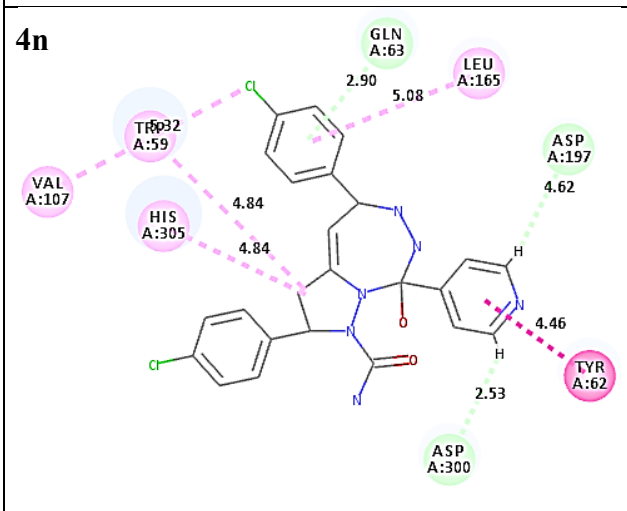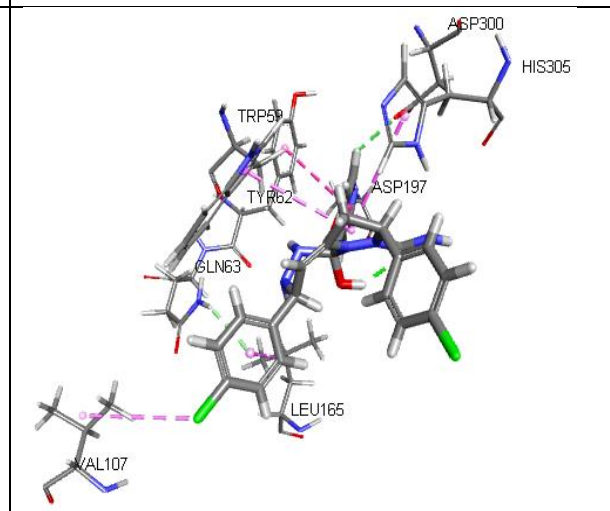

**Figure S49.** Molecular orbitals diagram (HOMO; bottom and LUMO; top) with HOMO-LUMO energy gap.

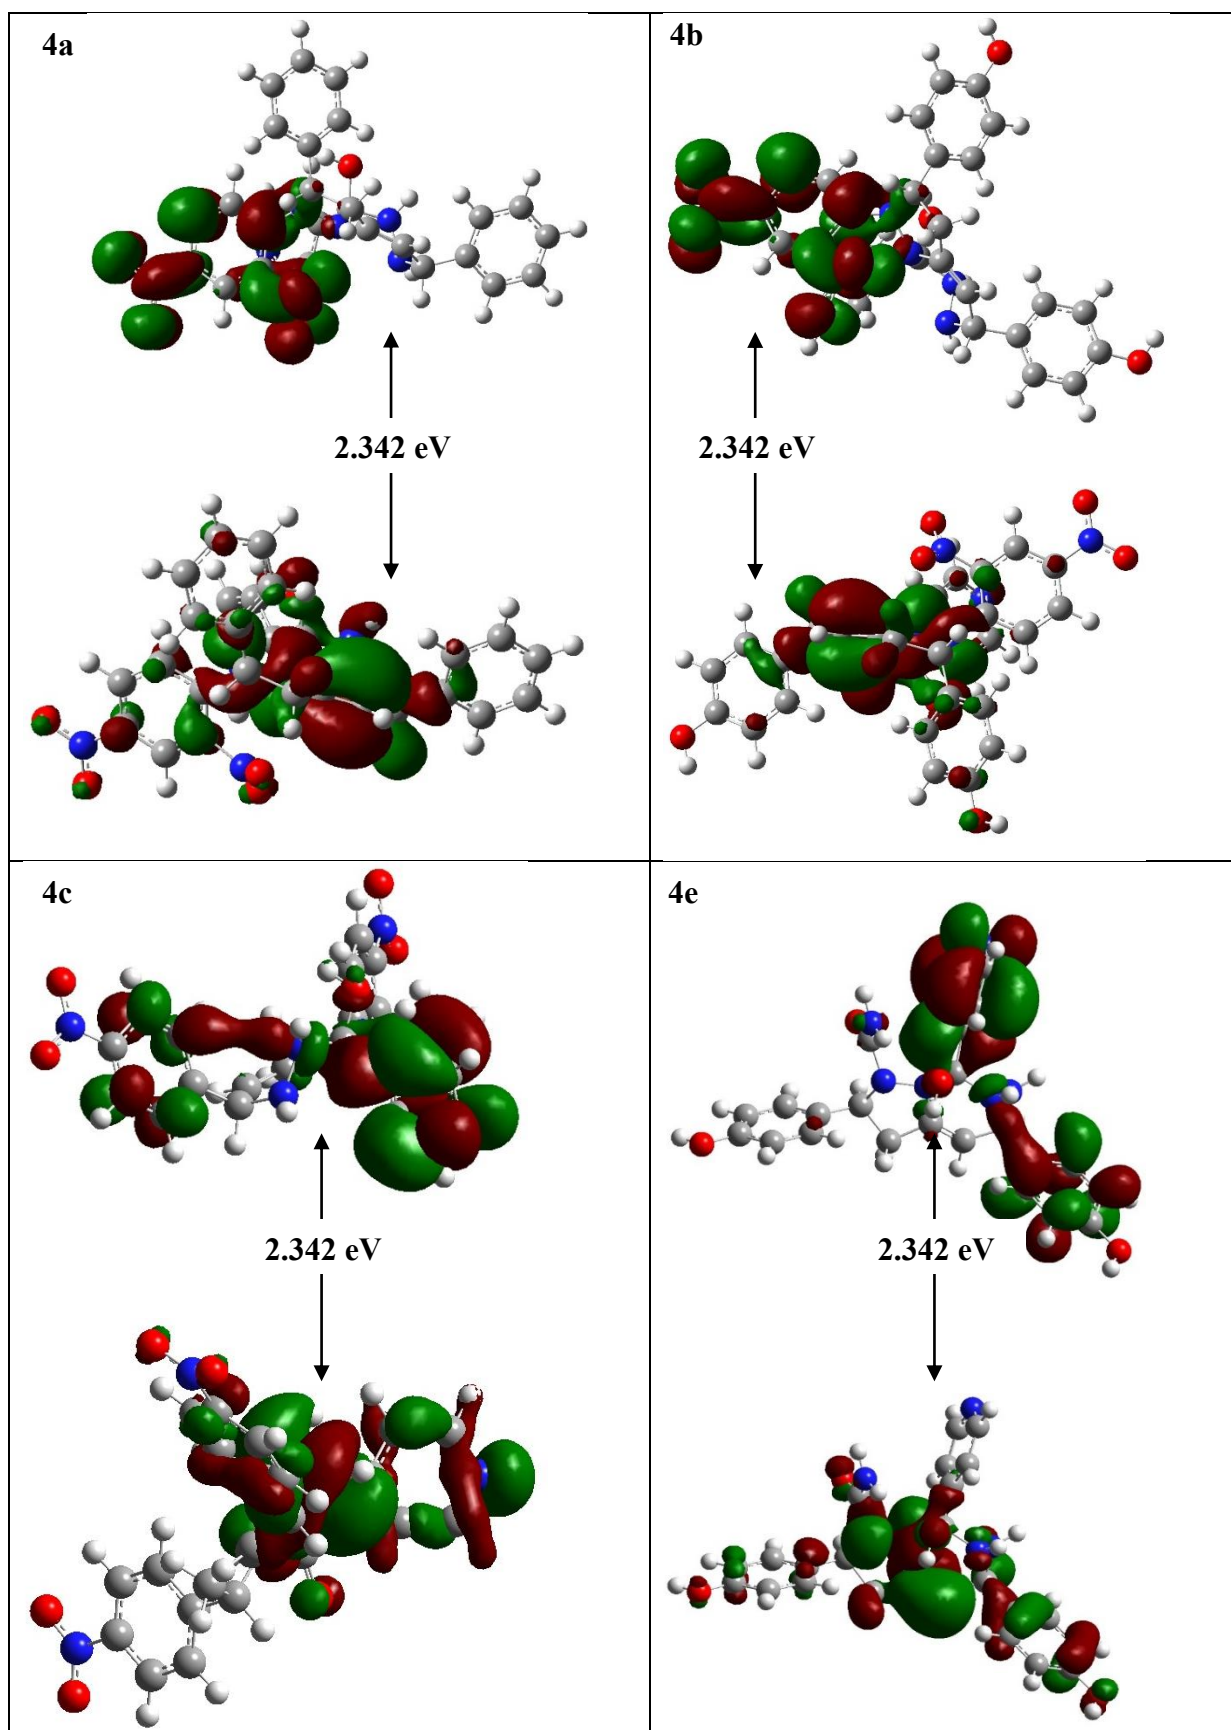

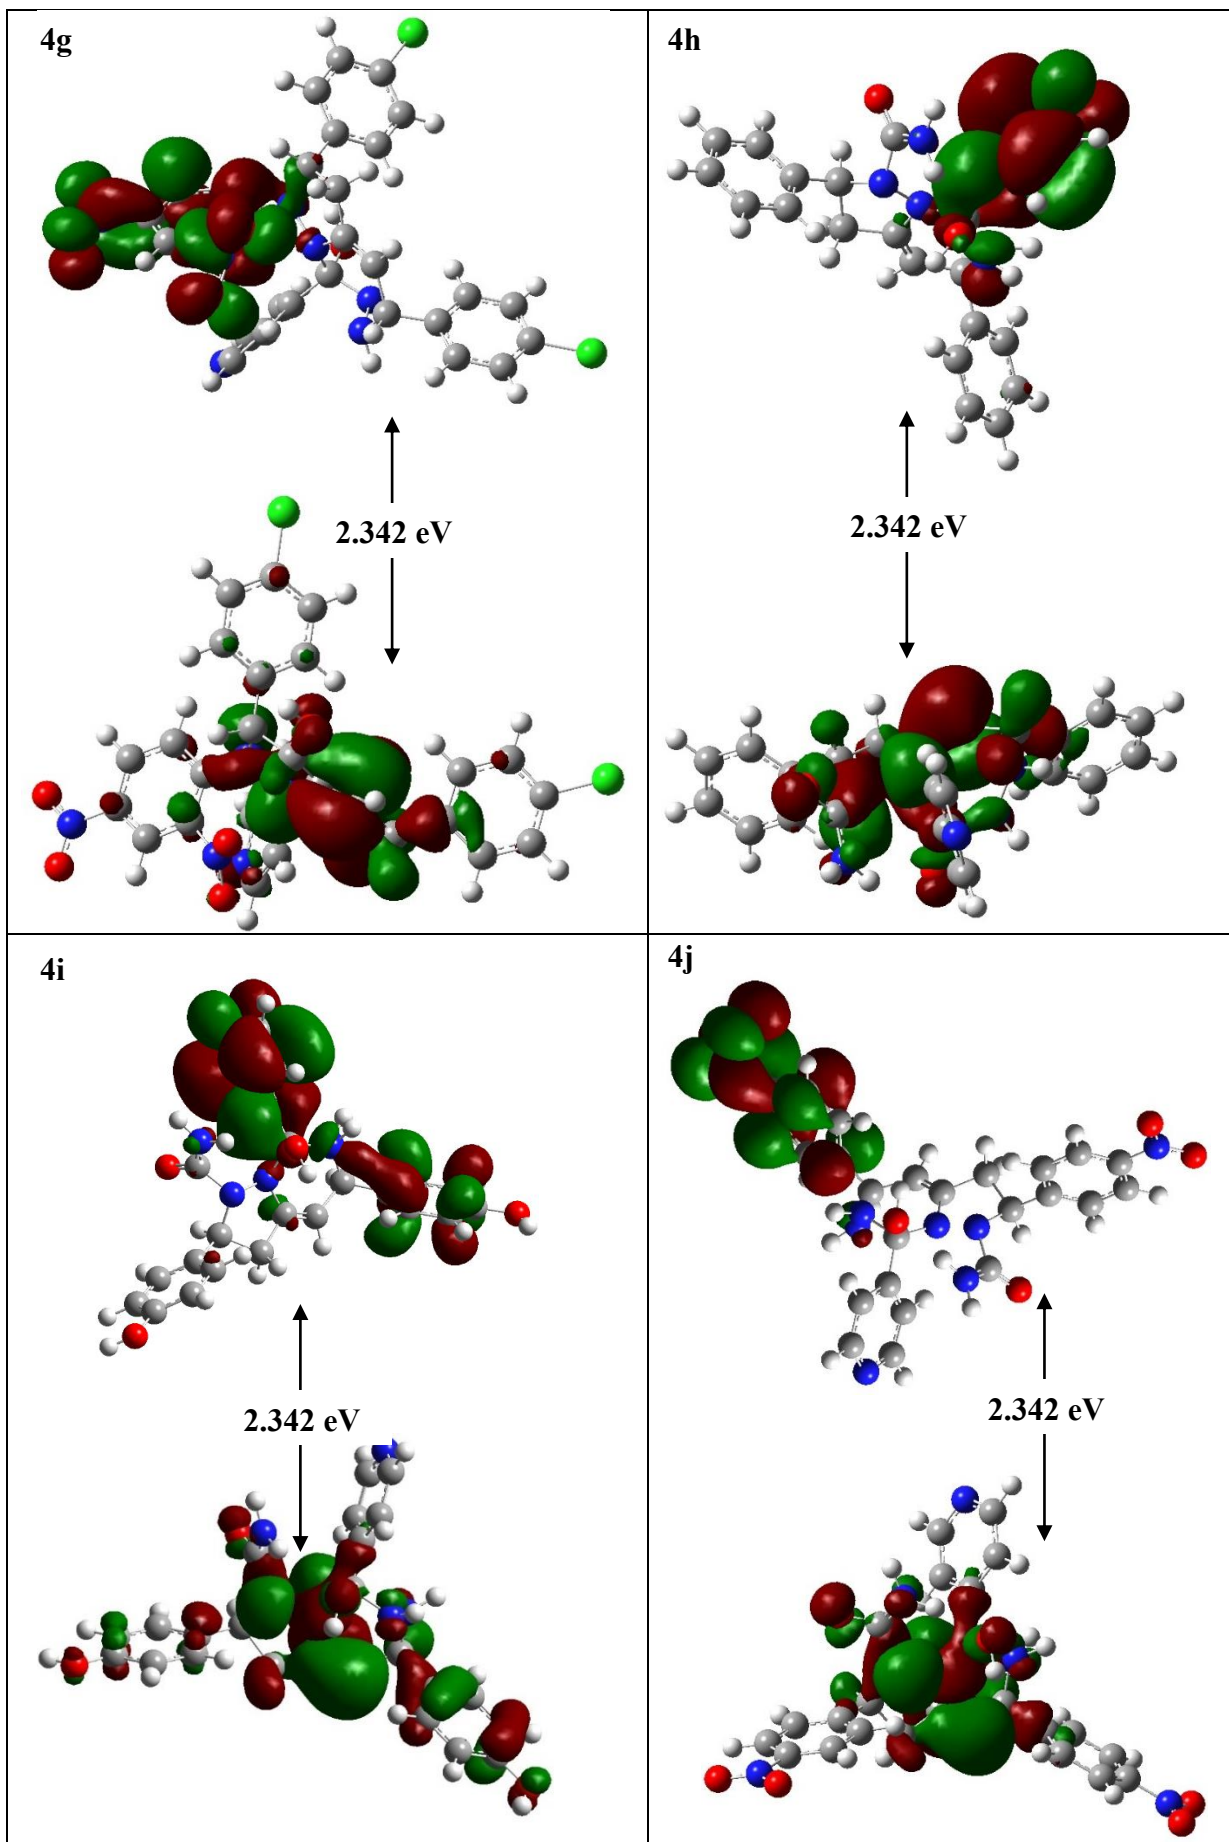

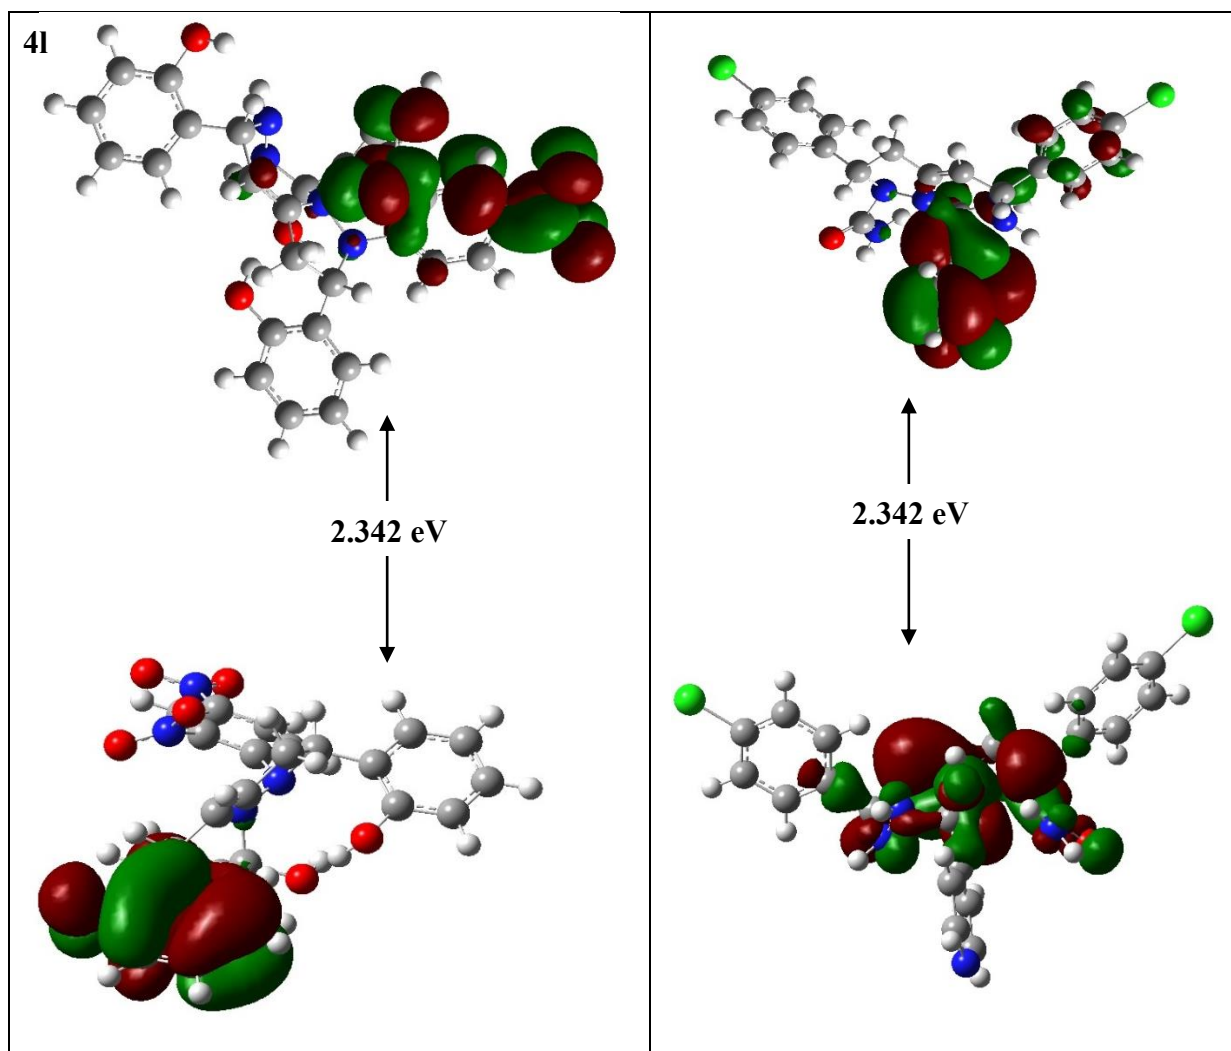

**Table S1.** Absorbance and corresponding % Inhibition of the tested compounds (4a-4n) against  $\alpha$ -amylase enzyme at different concentrations.

| Compounds | Absorbance |       |       | % Inhibition (50 $\mu$ g/ml) |          |          | Mean     | Std. Dev. | % Inhibition (50 $\mu$ g/ml) |
|-----------|------------|-------|-------|------------------------------|----------|----------|----------|-----------|------------------------------|
|           | Set_1      | Set_2 | Set_3 | Set_1                        | Set_2    | Set_3    |          |           |                              |
| 4a        | 0.77       | 0.85  | 0.74  | 16.30435                     | 20.65217 | 19.56522 | 18.84058 | 2.26268   | 18.84 $\pm$ 2.26             |
| 4b        | 0.56       | 0.64  | 0.53  | 39.13043                     | 34.78261 | 42.3913  | 38.76812 | 3.817266  | 39.13 $\pm$ 3.81             |
| 4c        | 0.58       | 0.66  | 0.55  | 36.95652                     | 32.6087  | 40.21739 | 36.5942  | 3.817266  | 36.59 $\pm$ 3.81             |
| 4d        | 0.48       | 0.56  | 0.45  | 47.82609                     | 45.65217 | 51.08696 | 48.18841 | 2.735447  | 48.18 $\pm$ 2.73             |
| 4e        | 0.7        | 0.78  | 0.67  | 23.91304                     | 23.91304 | 27.17391 | 25       | 1.882664  | 25.00 $\pm$ 1.88             |
| 4f        | 0.51       | 0.59  | 0.48  | 44.56522                     | 45.65217 | 47.82609 | 46.01449 | 1.660354  | 46.01 $\pm$ 1.66             |
| 4g        | 0.74       | 0.78  | 0.7   | 19.56522                     | 21.73913 | 23.91304 | 21.73913 | 2.173913  | 21.73 $\pm$ 2.17             |
| 4h        | 0.78       | 0.82  | 0.74  | 15.21739                     | 16.30435 | 19.56522 | 17.02899 | 2.26268   | 17.02 $\pm$ 2.26             |
| 4i        | 0.64       | 0.68  | 0.6   | 30.43478                     | 36.95652 | 34.78261 | 34.05797 | 3.320707  | 34.05 $\pm$ 3.32             |
| 4j        | 0.68       | 0.72  | 0.64  | 26.08696                     | 31.52174 | 30.43478 | 29.34783 | 2.875817  | 29.34 $\pm$ 2.87             |
| 4k        | 0.6        | 0.64  | 0.56  | 34.78261                     | 35.86957 | 39.13043 | 36.5942  | 2.26268   | 36.59 $\pm$ 2.26             |
| 4l        | 0.71       | 0.77  | 0.67  | 22.82609                     | 27.17391 | 27.17391 | 25.72464 | 2.510219  | 25.72 $\pm$ 2.51             |
| 4m        | 0.62       | 0.68  | 0.58  | 32.6087                      | 39.13043 | 36.95652 | 36.23188 | 3.320707  | 36.23 $\pm$ 3.32             |
| 4n        | 0.75       | 0.81  | 0.71  | 18.47826                     | 15.21739 | 22.82609 | 18.84058 | 3.817266  | 18.84 $\pm$ 3.81             |

| Compounds | Absorbance |       |       | % Inhibition (100 µg/ml) |          |          | Mean     | Std. Dev. | % Inhibition (100 µg/ml) |
|-----------|------------|-------|-------|--------------------------|----------|----------|----------|-----------|--------------------------|
|           | Set_1      | Set_2 | Set_3 | Set_1                    | Set_2    | Set_3    |          |           |                          |
| 4a        | 0.6        | 0.63  | 0.61  | 34.78261                 | 36.95652 | 33.69565 | 35.14493 | 1.660354  | 35.14 ± 1.66             |
| 4b        | 0.41       | 0.41  | 0.42  | 55.43478                 | 55.43478 | 54.34783 | 55.07246 | 0.627555  | 55.07 ± 0.63             |
| 4c        | 0.5        | 0.5   | 0.51  | 45.65217                 | 45.65217 | 44.56522 | 45.28986 | 0.627555  | 45.29 ± 0.63             |
| 4d        | 0.28       | 0.35  | 0.35  | 69.56522                 | 72.82609 | 72.82609 | 71.73913 | 1.882664  | 71.74 ± 1.88             |
| 4e        | 0.55       | 0.63  | 0.56  | 40.21739                 | 42.3913  | 39.13043 | 40.57971 | 1.660354  | 40.58 ± 1.66             |
| 4f        | 0.3        | 0.3   | 0.31  | 67.3913                  | 67.3913  | 66.30435 | 67.02899 | 0.627555  | 67.03 ± 0.63             |
| 4g        | 0.57       | 0.59  | 0.59  | 38.04348                 | 35.86957 | 35.86957 | 36.5942  | 1.255109  | 36.59 ± 1.26             |
| 4h        | 0.59       | 0.58  | 0.58  | 35.86957                 | 36.95652 | 36.95652 | 36.5942  | 0.627555  | 36.59 ± 0.63             |
| 4i        | 0.5        | 0.58  | 0.52  | 45.65217                 | 47.82609 | 43.47826 | 45.65217 | 2.173913  | 45.65 ± 2.17             |
| 4j        | 0.53       | 0.55  | 0.55  | 42.3913                  | 40.21739 | 40.21739 | 40.94203 | 1.255109  | 40.94 ± 1.26             |
| 4k        | 0.56       | 0.56  | 0.5   | 50                       | 50       | 45.65217 | 48.55072 | 2.510219  | 48.55 ± 2.51             |
| 4l        | 0.64       | 0.64  | 0.63  | 41.30435                 | 41.30435 | 42.3913  | 41.66667 | 0.627555  | 41.67 ± 0.63             |
| 4m        | 0.49       | 0.5   | 0.51  | 46.73913                 | 45.65217 | 44.56522 | 45.65217 | 1.086957  | 45.65 ± 1.09             |
| 4n        | 0.58       | 0.61  | 0.6   | 36.95652                 | 33.69565 | 34.78261 | 35.14493 | 1.660354  | 35.14 ± 1.66             |

| Compounds | Absorbance |       |       | % Inhibition (200 µg/ml) |          |          | Mean     | Std. Dev. | % Inhibition (200 µg/ml) |
|-----------|------------|-------|-------|--------------------------|----------|----------|----------|-----------|--------------------------|
|           | Set_1      | Set_2 | Set_3 | Set_1                    | Set_2    | Set_3    |          |           |                          |
| 4a        | 0.58       | 0.58  | 0.57  | 36.95652                 | 36.95652 | 38.04348 | 37.31884 | 0.627555  | 37.32 ± 0.63             |
| 4b        | 0.38       | 0.37  | 0.37  | 58.69565                 | 59.78261 | 59.78261 | 59.42029 | 0.627555  | 59.42 ± 0.63             |
| 4c        | 0.43       | 0.44  | 0.42  | 53.26087                 | 52.17391 | 54.34783 | 53.26087 | 1.086957  | 53.26 ± 1.09             |
| 4d        | 0.2        | 0.2   | 0.19  | 78.26087                 | 78.26087 | 79.34783 | 78.62319 | 0.627555  | 78.62 ± 0.63             |
| 4e        | 0.48       | 0.46  | 0.47  | 47.82609                 | 50       | 48.91304 | 48.91304 | 1.086957  | 48.91 ± 1.09             |
| 4f        | 0.25       | 0.33  | 0.24  | 72.82609                 | 75       | 73.91304 | 73.91304 | 1.086957  | 73.91 ± 1.09             |
| 4g        | 0.48       | 0.47  | 0.46  | 47.82609                 | 48.91304 | 50       | 48.91304 | 1.086957  | 48.91 ± 1.09             |
| 4h        | 0.63       | 0.64  | 0.64  | 36.95652                 | 44.56522 | 44.56522 | 42.02899 | 4.392882  | 42.03 ± 4.39             |
| 4i        | 0.46       | 0.44  | 0.45  | 50                       | 52.17391 | 51.08696 | 51.08696 | 1.086957  | 51.09 ± 1.09             |
| 4j        | 0.49       | 0.48  | 0.48  | 46.73913                 | 47.82609 | 47.82609 | 47.46377 | 0.627555  | 47.46 ± 0.63             |
| 4k        | 0.42       | 0.43  | 0.41  | 54.34783                 | 53.26087 | 55.43478 | 54.34783 | 1.086957  | 54.35 ± 1.09             |
| 4l        | 0.5        | 0.49  | 0.49  | 45.65217                 | 46.73913 | 46.73913 | 46.37681 | 0.627555  | 46.38 ± 0.63             |
| 4m        | 0.48       | 0.47  | 0.49  | 52.17391                 | 47.82609 | 48.91304 | 53.26087 | 2.26268   | 53.26 ± 2.26             |
| 4n        | 0.51       | 0.51  | 0.5   | 44.56522                 | 44.56522 | 45.65217 | 44.92754 | 0.627555  | 44.93 ± 0.63             |

| Compounds | Absorbance |       |       | % Inhibition (300 µg/ml) |          |          | Mean     | Std. Dev. | % Inhibition (300 µg/ml) |
|-----------|------------|-------|-------|--------------------------|----------|----------|----------|-----------|--------------------------|
|           | Set_1      | Set_2 | Set_3 | Set_1                    | Set_2    | Set_3    |          |           |                          |
| 4a        | 0.5        | 0.49  | 0.49  | 45.65217                 | 46.73913 | 46.73913 | 46.37681 | 0.627555  | 46.38 ± 0.63             |
| 4b        | 0.31       | 0.3   | 0.29  | 66.30435                 | 67.3913  | 68.47826 | 67.3913  | 1.086957  | 67.39 ± 1.09             |
| 4c        | 0.4        | 0.41  | 0.41  | 56.52174                 | 55.43478 | 55.43478 | 55.7971  | 0.627555  | 55.80 ± 0.63             |
| 4d        | 0.11       | 0.1   | 0.13  | 88.04348                 | 89.13043 | 85.86957 | 87.68116 | 1.660354  | 87.68 ± 1.66             |
| 4e        | 0.46       | 0.45  | 0.46  | 50                       | 51.08696 | 50       | 50.36232 | 0.627555  | 50.36 ± 0.63             |
| 4f        | 0.2        | 0.19  | 0.18  | 78.26087                 | 79.34783 | 80.43478 | 79.34783 | 1.086957  | 79.35 ± 1.09             |
| 4g        | 0.45       | 0.47  | 0.45  | 51.08696                 | 48.91304 | 51.08696 | 50.36232 | 1.255109  | 50.36 ± 5.02             |
| 4h        | 0.53       | 0.52  | 0.52  | 42.3913                  | 43.47826 | 43.47826 | 43.11594 | 0.627555  | 43.12 ± 0.63             |
| 4i        | 0.44       | 0.43  | 0.43  | 52.17391                 | 53.26087 | 54.34783 | 53.26087 | 1.086957  | 53.26 ± 1.09             |

|    |      |      |      |          |          |          |          |          |              |
|----|------|------|------|----------|----------|----------|----------|----------|--------------|
| 4j | 0.45 | 0.44 | 0.44 | 51.08696 | 52.17391 | 53.26087 | 53.26087 | 1.086957 | 53.26 ± 1.09 |
| 4k | 0.41 | 0.4  | 0.45 | 55.43478 | 56.52174 | 57.6087  | 56.52174 | 1.086957 | 56.52 ± 1.09 |
| 4l | 0.44 | 0.43 | 0.44 | 52.17391 | 53.26087 | 52.17391 | 52.53623 | 0.627555 | 52.54 ± 0.63 |
| 4m | 0.42 | 0.41 | 0.42 | 54.34783 | 55.43478 | 54.34783 | 54.71014 | 0.627555 | 54.71 ± 0.63 |
| 4n | 0.48 | 0.47 | 0.46 | 47.82609 | 48.91304 | 50       | 48.91304 | 1.086957 | 48.91 ± 1.09 |

| Compounds | Absorbance |       |       | % Inhibition (400 µg/ml) |          |          | Mean     | Std. Dev. | % Inhibition (400 µg/ml) |
|-----------|------------|-------|-------|--------------------------|----------|----------|----------|-----------|--------------------------|
|           | Set_1      | Set_2 | Set_3 | Set_1                    | Set_2    | Set_3    |          |           |                          |
| 4a        | 0.48       | 0.49  | 0.48  | 47.82609                 | 46.73913 | 47.82609 | 47.46377 | 0.627555  | 47.46 ± 0.63             |
| 4b        | 0.29       | 0.3   | 0.29  | 68.47826                 | 67.3913  | 68.47826 | 68.11594 | 0.627555  | 68.12 ± 0.63             |
| 4c        | 0.38       | 0.39  | 0.38  | 58.69565                 | 57.6087  | 58.69565 | 58.33333 | 0.627555  | 58.33 ± 0.63             |
| 4d        | 0.11       | 0.1   | 0.1   | 88.04348                 | 89.13043 | 89.13043 | 88.76812 | 0.627555  | 88.77 ± 0.63             |
| 4e        | 0.44       | 0.45  | 0.44  | 52.17391                 | 51.08696 | 52.17391 | 51.81159 | 0.627555  | 51.81 ± 0.63             |
| 4f        | 0.18       | 0.19  | 0.18  | 80.43478                 | 79.34783 | 80.43478 | 80.07246 | 0.627555  | 80.07 ± 0.63             |
| 4g        | 0.44       | 0.45  | 0.44  | 52.17391                 | 51.08696 | 52.17391 | 51.81159 | 0.627555  | 51.81 ± 0.62             |
| 4h        | 0.41       | 0.41  | 0.42  | 55.43478                 | 55.43478 | 54.34783 | 55.07246 | 0.627555  | 55.07 ± 0.63             |
| 4i        | 0.44       | 0.43  | 0.43  | 52.17391                 | 53.26087 | 54.34783 | 53.26087 | 1.086957  | 53.26 ± 1.09             |
| 4j        | 0.39       | 0.44  | 0.39  | 57.26087                 | 52.17391 | 57.26087 | 55.56522 | 2.936956  | 52.90 ± 0.63             |
| 4k        | 0.41       | 0.4   | 0.4   | 55.43478                 | 56.52174 | 56.52174 | 56.15942 | 0.627555  | 56.16 ± 0.63             |
| 4l        | 0.44       | 0.43  | 0.42  | 52.17391                 | 53.26087 | 54.34783 | 53.26087 | 1.086957  | 53.26 ± 1.09             |
| 4m        | 0.42       | 0.41  | 0.41  | 54.34783                 | 55.43478 | 55.43478 | 55.07246 | 0.627555  | 55.07 ± 0.63             |
| 4n        | 0.43       | 0.44  | -     | 53.26087                 | 52.17391 | -        | 52.71739 | 0.768594  | 52.72 ± 0.77             |

| Compounds | Absorbance |       |       | % Inhibition (500 µg/ml) |          |          | Mean     | Std. Dev. | % Inhibition (500µg/ml) |
|-----------|------------|-------|-------|--------------------------|----------|----------|----------|-----------|-------------------------|
|           | Set_1      | Set_2 | Set_3 | Set_1                    | Set_2    | Set_3    |          |           |                         |
| 4a        | 0.44       | 0.43  | 0.43  | 52.17391                 | 54.34783 | 54.34783 | 53.62319 | 1.255109  | 53.62 ± 1.25            |
| 4b        | 0.29       | 0.3   | 0.29  | 68.47826                 | 67.3913  | 68.47826 | 68.11594 | 0.627555  | 68.11 ± 0.62            |
| 4c        | 0.38       | 0.36  | 0.36  | 58.69565                 | 60.86957 | 60.86957 | 60.14493 | 1.255109  | 60.14 ± 1.25            |
| 4d        | 0.1        | 0.1   | 0.1   | 89.13043                 | 89.13043 | 89.13043 | 89.13043 | 0         | 89.13 ± 0.00            |
| 4e        | 0.42       | 0.42  | 0.44  | 52.17391                 | 54.34783 | 54.34783 | 53.62319 | 1.255109  | 53.62 ± 1.25            |
| 4f        | 0.18       | 0.18  | 0.18  | 80.43478                 | 80.43478 | 80.43478 | 80.43478 | 0         | 80.43 ± 0.00            |
| 4g        | 0.53       | 0.54  | 0.54  | 53.26087                 | 52.17391 | 52.17391 | 52.53623 | 0.627555  | 52.54 ± 0.63            |
| 4h        | 0.41       | 0.41  | 0.4   | 55.43478                 | 55.43478 | 56.52174 | 55.7971  | 0.627555  | 55.79 ± 0.62            |
| 4i        | 0.43       | 0.43  | 0.41  | 53.26087                 | 53.26087 | 55.43478 | 53.98551 | 1.255109  | 53.98 ± 1.25            |
| 4j        | 0.39       | 0.38  | 0.4   | 57.26087                 | 58.69565 | 56.52174 | 57.49275 | 1.105352  | 57.49 ± 1.10            |
| 4k        | 0.39       | 0.38  | 0.38  | 57.26087                 | 58.69565 | 58.69565 | 58.21739 | 0.828372  | 58.21 ± 0.82            |
| 4l        | 0.42       | 0.43  | 0.42  | 54.34783                 | 53.26087 | 54.34783 | 53.98551 | 0.627555  | 53.98 ± 0.62            |
| 4m        | 0.4        | 0.41  | 0.41  | 56.52174                 | 55.43478 | 55.43478 | 55.7971  | 0.627555  | 55.79 ± 0.62            |
| 4n        | 0.43       | 0.42  | -     | 53.26087                 | 54.34783 | -        | 53.80435 | 0.768594  | 53.80 ± 0.76            |

**Table S2.** Absorbance and corresponding % Inhibition of the tested compounds (4a-4n) against  $\alpha$ -glucosidase enzyme at different concentrations.



|    |      |      |      |          |          |          |          |          |               |
|----|------|------|------|----------|----------|----------|----------|----------|---------------|
| 4j | 0.53 | 0.54 | 0.53 | 32.05128 | 30.76923 | 32.05128 | 31.62393 | 18.17573 | 17.09 ± 9.13  |
| 4k | 0.43 | 0.41 | 0.41 | 44.87179 | 47.4359  | 47.4359  | 46.5812  | 26.35482 | 46.58 ± 26.35 |
| 4l | 0.56 | 0.55 | 0.53 | 28.20513 | 29.48718 | 32.05128 | 29.91453 | 17.10461 | 29.91 ± 17.10 |
| 4m | 0.46 | 0.43 | 0.43 | 41.02564 | 44.87179 | 44.87179 | 43.58974 | 24.52556 | 43.59 ± 24.53 |
| 4n | 0.53 | 0.54 | 0.54 | 32.05128 | 30.76923 | 30.76923 | 31.19658 | 17.77101 | 31.20 ± 17.77 |

| Compounds | Absorbance |       |       | % Inhibition (300 µg/ml) |          |          | Mean     | Std. Dev. | % Inhibition (300 µg/ml) |
|-----------|------------|-------|-------|--------------------------|----------|----------|----------|-----------|--------------------------|
|           | Set_1      | Set_2 | Set_3 | Set_1                    | Set_2    | Set_3    |          |           |                          |
| 4a        | 0.54       | 0.53  | 0.53  | 30.76923                 | 32.05128 | 32.05128 | 31.62393 | 0.740193  | 31.62 ± 0.74             |
| 4b        | 0.43       | 0.42  | 0.41  | 44.87179                 | 46.15385 | 47.4359  | 46.15385 | 1.282051  | 46.15 ± 1.28             |
| 4c        | 0.45       | 0.47  | 0.46  | 42.30769                 | 39.74359 | 41.02564 | 41.02564 | 1.282051  | 41.03 ± 1.28             |
| 4d        | 0.28       | 0.27  | 0.25  | 64.10256                 | 65.38462 | 67.94872 | 65.81197 | 1.958366  | 65.81 ± 1.96             |
| 4e        | 0.52       | 0.51  | 0.54  | 33.33333                 | 34.61538 | 30.76923 | 32.90598 | 1.958366  | 32.91 ± 1.96             |
| 4f        | 0.38       | 0.37  | 0.37  | 51.28205                 | 52.5641  | 52.5641  | 52.13675 | 0.740193  | 52.14 ± 0.74             |
| 4g        | 0.5        | 0.51  | 0.52  | 35.89744                 | 34.61538 | 33.33333 | 34.61538 | 1.282051  | 34.62 ± 1.28             |
| 4h        | 0.51       | 0.52  | 0.51  | 34.61538                 | 33.33333 | 34.61538 | 34.18803 | 0.740193  | 34.19 ± 0.74             |
| 4i        | 0.44       | 0.43  | 0.46  | 43.58974                 | 44.87179 | 41.02564 | 43.16239 | 1.958366  | 43.16 ± 1.96             |
| 4j        | 0.52       | 0.52  | 0.54  | 33.33333                 | 33.33333 | 30.76923 | 32.47863 | 1.480385  | 32.48 ± 1.48             |
| 4k        | 0.4        | 0.42  | 0.41  | 48.71795                 | 46.15385 | 47.4359  | 47.4359  | 1.282051  | 47.44 ± 1.28             |
| 4l        | 0.48       | 0.46  | 0.46  | 38.46154                 | 41.02564 | 41.02564 | 40.17094 | 1.480385  | 40.17 ± 1.48             |
| 4m        | 0.42       | 0.42  | 0.43  | 46.15385                 | 46.15385 | 44.87179 | 45.7265  | 0.740193  | 45.73 ± 0.74             |
| 4n        | 0.46       | 0.48  | 0.44  | 41.02564                 | 38.46154 | 43.58974 | 41.02564 | 2.564103  | 41.03 ± 2.56             |

| Compounds | Absorbance |       |       | % Inhibition (400 µg/ml) |          |          | Mean     | Std. Dev. | % Inhibition (400 µg/ml) |
|-----------|------------|-------|-------|--------------------------|----------|----------|----------|-----------|--------------------------|
|           | Set_1      | Set_2 | Set_3 | Set_1                    | Set_2    | Set_3    |          |           |                          |
| 4a        | 0.43       | 0.54  | 0.53  | 44.87179                 | 30.76923 | 32.05128 | 35.89744 | 7.798414  | 35.90 ± 7.80             |
| 4b        | 0.39       | 0.37  | 0.37  | 50                       | 52.5641  | 52.5641  | 51.7094  | 1.480385  | 51.71 ± 1.48             |
| 4c        | 0.43       | 0.42  | 0.41  | 44.87179                 | 46.15385 | 47.4359  | 46.15385 | 1.282051  | 46.15 ± 1.28             |
| 4d        | 0.22       | 0.24  | 0.21  | 71.79487                 | 69.23077 | 73.07692 | 71.36752 | 1.958366  | 71.37 ± 1.96             |
| 4e        | 0.49       | 0.47  | 0.47  | 37.17949                 | 39.74359 | 39.74359 | 38.88889 | 1.480385  | 38.89 ± 1.48             |
| 4f        | 0.24       | 0.22  | 0.28  | 69.23077                 | 71.79487 | 64.10256 | 68.37607 | 3.916731  | 68.38 ± 3.92             |
| 4g        | 0.39       | 0.37  | 0.37  | 50                       | 52.5641  | 52.5641  | 51.7094  | 1.480385  | 51.71 ± 1.48             |
| 4h        | 0.48       | 0.46  | 0.46  | 38.46154                 | 41.02564 | 41.02564 | 40.17094 | 1.480385  | 40.17 ± 1.48             |
| 4i        | 0.41       | 0.39  | 0.43  | 47.4359                  | 50       | 44.87179 | 47.4359  | 2.564103  | 47.44 ± 2.56             |
| 4j        | 0.48       | 0.46  | 0.43  | 38.46154                 | 41.02564 | 44.87179 | 41.45299 | 3.226425  | 41.45 ± 3.23             |
| 4k        | 0.3        | 0.28  | 0.32  | 61.53846                 | 64.10256 | 58.97436 | 61.53846 | 2.564103  | 61.54 ± 2.56             |
| 4l        | 0.46       | 0.44  | 0.44  | 41.02564                 | 43.58974 | 43.58974 | 42.73504 | 1.480385  | 42.74 ± 1.48             |
| 4m        | 0.34       | 0.32  | 0.35  | 56.41026                 | 58.97436 | 55.12821 | 56.83761 | 1.958366  | 56.84 ± 1.96             |
| 4n        | 0.49       | 0.47  | 0.48  | 37.17949                 | 39.74359 | 38.46154 | 38.46154 | 1.282051  | 38.46 ± 1.28             |

| Compounds | Absorbance |       |       | % Inhibition (500 µg/ml) |          |          | Mean     | Std. Dev. | % Inhibition (500µg/ml) |
|-----------|------------|-------|-------|--------------------------|----------|----------|----------|-----------|-------------------------|
|           | Set_1      | Set_2 | Set_3 | Set_1                    | Set_2    | Set_3    |          |           |                         |
| 4a        | 0.39       | 0.38  | 0.39  | 50                       | 51.28205 | 50       | 50.42735 | 28.55574  | 50.43 ± 28.56           |
| 4b        | 0.32       | 0.31  | 0.32  | 58.97436                 | 60.25641 | 58.97436 | 59.40171 | 33.8006   | 59.40 ± 33.80           |

|    |      |      |      |          |          |          |          |          |               |
|----|------|------|------|----------|----------|----------|----------|----------|---------------|
| 4c | 0.4  | 0.4  | 0.4  | 48.71795 | 48.71795 | 48.71795 | 48.71795 | 27.86751 | 48.72 ± 27.87 |
| 4d | 0.11 | 0.1  | 0.1  | 85.89744 | 87.17949 | 87.17949 | 86.75214 | 49.80547 | 86.75 ± 49.81 |
| 4e | 0.42 | 0.41 | 0.42 | 46.15385 | 47.4359  | 46.15385 | 46.5812  | 26.34671 | 46.58 ± 26.35 |
| 4f | 0.19 | 0.18 | 0.18 | 75.64103 | 76.92308 | 76.92308 | 76.49573 | 43.82676 | 76.50 ± 43.83 |
| 4g | 0.31 | 0.31 | 0.31 | 60.25641 | 60.25641 | 60.25641 | 60.25641 | 34.50038 | 60.26 ± 34.50 |
| 4h | 0.42 | 0.43 | 0.42 | 46.15385 | 44.87179 | 46.15385 | 45.7265  | 26.35249 | 45.73 ± 26.35 |
| 4i | 0.39 | 0.38 | 0.38 | 50       | 51.28205 | 51.28205 | 50.8547  | 28.99066 | 50.85 ± 28.99 |
| 4j | 0.43 | 0.42 | 0.43 | 44.87179 | 46.15385 | 44.87179 | 45.29915 | 25.60652 | 45.30 ± 25.61 |
| 4k | 0.24 | 0.23 | 0.24 | 69.23077 | 70.51282 | 69.23077 | 69.65812 | 39.73946 | 69.66 ± 39.74 |
| 4l | 0.41 | 0.43 | 0.41 | 47.4359  | 44.87179 | 47.4359  | 46.5812  | 27.11    | 46.58 ± 27.11 |
| 4m | 0.28 | 0.28 | 0.28 | 64.10256 | 64.10256 | 64.10256 | 64.10256 | 36.76715 | 64.10 ± 36.77 |
| 4n | 0.44 | 0.43 | 0.43 | 43.58974 | 44.87179 | 44.87179 | 44.44444 | 25.27919 | 44.44 ± 25.28 |
